# Supplementary material for: Enantioselective construction of cis-hydroindole scaffolds via an asymmetric inverse-electron-demand Diels–Alder reaction: application to the formal total synthesis of (+)-minovincine
Source: Royal Society of Chemistry journal article supplement (doi:10.1039/d2sc01458k), 2022-01-01
Supplement: d2sc01458k1.pdf [file d2sc01458k1.pdf]

# Enantioselective Construction of *cis*-Hydroindole Scaffolds via Asymmetric Inverse-Electron-Demand Diels–Alder Reaction: Application to the Formal Total Synthesis of (+)-Minovincine

Fangqing Zhang, Bing-Tao Ren, Yuqiao Zhou, Yangbin Liu\* and Xiaoming Feng\*

## Table of Contents:

|                                                                      |    |
|----------------------------------------------------------------------|----|
| 1. General Information .....                                         | 2  |
| 2. Optimization of Reaction Conditions .....                         | 3  |
| Table S1. Investigation of Lewis Acids. ....                         | 3  |
| Table S2. Investigation of Ligands.....                              | 4  |
| Table S3. Investigation of Solvents.....                             | 5  |
| Table S4. Investigation of Temperature. ....                         | 5  |
| Table S5. Investigation of the Loading and Ratio of Catalyst.....    | 6  |
| 3. Preparation of Substrates.....                                    | 6  |
| Table S6. Structures of Substituted 2-pyrones. ....                  | 6  |
| Table S7. Structures of Substituted Enamines.....                    | 7  |
| 4. General Procedure for the Catalytic Asymmetric Reaction .....     | 7  |
| 5. Procedure for Transformation of Product.....                      | 16 |
| 6. Asymmetric Formal Total Synthesis of (+)-Minovincine .....        | 18 |
| 7. X-ray Crystallographic Data of <b>3a</b> .....                    | 23 |
| Table S8. Crystal Data and Structure Refinement for <b>3a</b> . .... | 23 |
| 8. Reference.....                                                    | 24 |
| 9. Chromatographic Data for Chiral Products .....                    | 25 |
| 10. NMR Spectra of New Compounds.....                                | 45 |

## 1. General Information

All manipulations were maintained under an atmosphere of argon unless otherwise stated. All solvents were dried and distilled according to general practice prior to use. All reagents were purchased from commercial sources and used without further purification unless specified otherwise. Solvents for flash column chromatography were technical grade and distilled prior to use. Analytical thin-layer chromatography (TLC) was performed using Huanghai silica gel plates with HSGF 254. Visualization of the developed chromatogram was performed by UV absorbance (254 nm) and appropriate stains. Flash column chromatography was performed using silica gel (300-400 mesh) from Leyan.com with the indicated solvent system according to standard techniques.  $\text{CDCl}_3$  was bought from Leyan.com.  $^1\text{H}$  NMR and  $^{13}\text{C}$  NMR were recorded on a Bruker NMR 400 or Bruker NMR 500. Multiplicities are described as: s (singlet), d (doublet), t (triplet), q (quartet), m (multiplet); and coupling constants (J) are reported in Hertz (Hz).  $^{13}\text{C}$  NMR spectra were recorded with total proton decoupling. Chiral HPLC was recorded on a Shimadzu LC-20A spectrometer using Daicel Chiralcel IA, OJ, ID, AD, OD columns. HRMS (ESI) analysis was performed by the Analytical Instrumentation Center at Peking University Shenzhen Graduate School and (HRMS) data were reported with ion mass/charge (m/z) ratios as values in atomic mass units.

## 2. Optimization of Reaction Conditions

**Table S1. Investigation of Lewis Acids.**

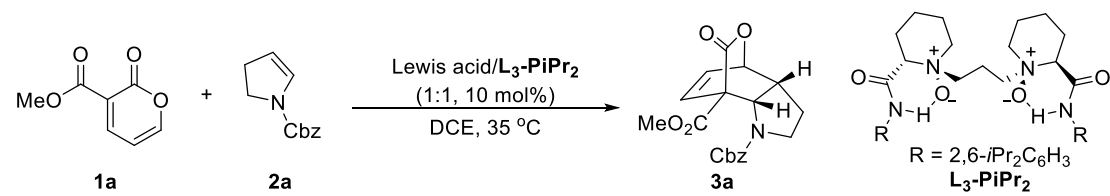

| Entry <sup>a</sup> | Lewis acid                                           | Time (h) | Yield (%) <sup>b</sup> | ee (%) <sup>c</sup> |
|--------------------|------------------------------------------------------|----------|------------------------|---------------------|
| 1                  | Fe(OTf) <sub>3</sub>                                 | 24       | trace                  | --                  |
| 2                  | In(OTf) <sub>3</sub>                                 | 24       | trace                  | --                  |
| 3                  | Sc(OTf) <sub>3</sub>                                 | 24       | trace                  | --                  |
| 4                  | Zn(OTf) <sub>2</sub>                                 | 3        | 91                     | -18                 |
| 5                  | Ni(OTf) <sub>2</sub>                                 | 3        | 86                     | 37                  |
| 6                  | Yb(OTf) <sub>3</sub>                                 | 3        | 92                     | 13                  |
| 7                  | La(OTf) <sub>3</sub>                                 | 7        | 91                     | 4                   |
| 8                  | Co(BF <sub>4</sub> ) <sub>2</sub> ·6H <sub>2</sub> O | 3        | 62                     | 79                  |
| 9                  | Gd(OTf) <sub>3</sub>                                 | 3        | 50                     | 2                   |
| 10                 | Mg(OTf) <sub>2</sub>                                 | 3        | 73                     | 78                  |
| 11                 | Ca(OTf) <sub>2</sub>                                 | 12       | trace                  | --                  |
| 12                 | Cu(OTf) <sub>2</sub>                                 | 8        | 66                     | 42                  |
| 13                 | Dy(OTf) <sub>3</sub>                                 | 10       | 74                     | 71                  |

<sup>a</sup> Reaction conditions: **1a** (0.10 mmol), **2a** (0.15 mmol, 1.5 equiv.), Lewis acid (10 mol%), **L<sub>3</sub>-PiPr<sub>2</sub>** (10 mol%), DCE (0.5 mL), rt. <sup>b</sup> NMR yield detected by using CH<sub>2</sub>Br<sub>2</sub> as an internal standard. <sup>c</sup> Enantiomeric excess determined by HPLC analysis on a chiral stationary phase. DCE = 1,2-dichloroethane.

**Table S2. Investigation of Ligands.**

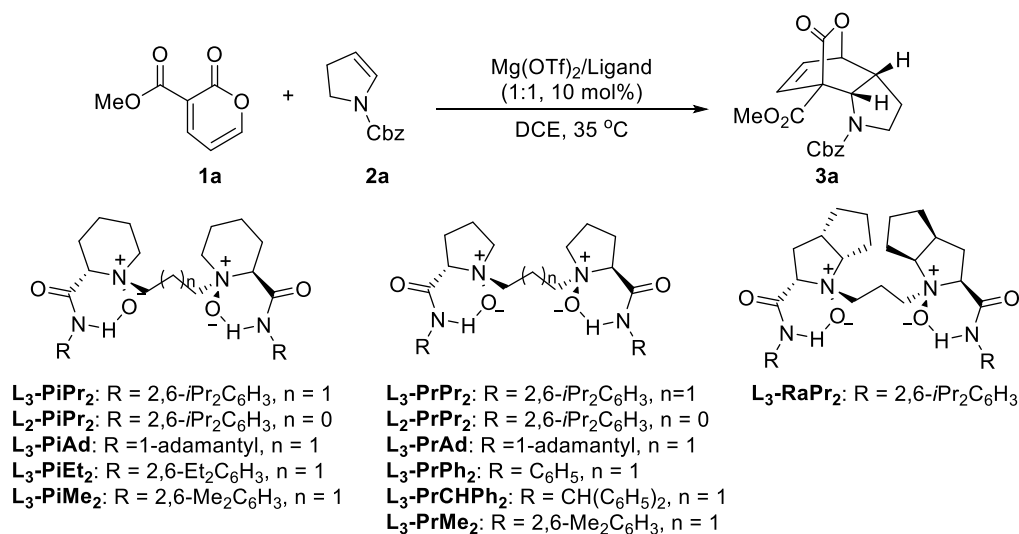

| Entry <sup>a</sup> | Ligand.                                 | Time (h) | Yield (%) <sup>b</sup> | ee (%) <sup>c</sup> |
|--------------------|-----------------------------------------|----------|------------------------|---------------------|
| 1                  | <b>L<sub>3</sub>-PiPr<sub>2</sub></b>   | 3        | 80                     | 79                  |
| 2                  | <b>L<sub>2</sub>-PiPr<sub>2</sub></b>   | 12       | 99                     | 68                  |
| 3                  | <b>L<sub>3</sub>-PrPr<sub>2</sub></b>   | 12       | 97                     | 69                  |
| 4                  | <b>L<sub>2</sub>-PrPr<sub>2</sub></b>   | 17       | 97                     | 67                  |
| 5                  | <b>L<sub>3</sub>-RaPr<sub>2</sub></b>   | 12       | 99                     | 79                  |
| 6                  | <b>L<sub>3</sub>-PiMe<sub>2</sub></b>   | 3        | 97                     | 88                  |
| 7                  | <b>L<sub>3</sub>-PiAd</b>               | 17       | 91                     | 12                  |
| 8                  | <b>L<sub>3</sub>-PiEt<sub>2</sub></b>   | 6        | 95                     | 82                  |
| 9                  | <b>L<sub>3</sub>-PrMe<sub>2</sub></b>   | 17       | 93                     | 43                  |
| 10                 | <b>L<sub>3</sub>-PrPh</b>               | 12       | 99                     | 2                   |
| 11                 | <b>L<sub>3</sub>-PrAd</b>               | 3        | 96                     | 20                  |
| 12                 | <b>L<sub>3</sub>-PrCHPh<sub>2</sub></b> | 6        | 99                     | 6                   |

<sup>a</sup> Reaction conditions: **1a** (0.10 mmol), **2a** (0.15 mmol, 1.5 equiv.), Mg(OTf)<sub>2</sub> (10 mol%), ligand (10 mol%), DCE (0.5 mL), rt., <sup>b</sup> NMR yield detected by using CH<sub>2</sub>Br<sub>2</sub> as an internal standard. <sup>c</sup> Enantiomeric excess determined by HPLC analysis on a chiral stationary phase. DCE = 1,2-dichloroethane.

**Table S3. Investigation of Solvents.**
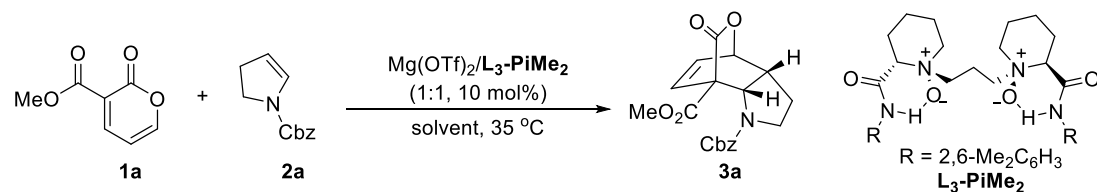

| Entry <sup>a</sup> | Solvent           | Time (h) | Yield (%) <sup>b</sup> | ee (%) <sup>c</sup> |
|--------------------|-------------------|----------|------------------------|---------------------|
| 1                  | DCE               | 3        | 93                     | 88                  |
| 2                  | DCM               | 3        | 99                     | 91                  |
| 3                  | CHCl <sub>3</sub> | 3        | 99                     | 95                  |
| 4                  | Tol               | 12       | 86                     | 64                  |
| 5                  | PhCl              | 12       | 97                     | 85                  |
| 6                  | THF               | 12       | 96                     | 64                  |
| 7                  | Et <sub>2</sub> O | 12       | 99                     | 77                  |
| 8                  | EA                | 12       | 60                     | 85                  |
| 9                  | MeCN              | 12       | 99                     | 88                  |
| 10                 | MeOH              | 12       | 68                     | 28                  |

<sup>a</sup> Reaction conditions: **1a** (0.10 mmol), **2a** (0.15 mmol, 1.5 equiv.), Mg(OTf)<sub>2</sub> (10 mol %), **L<sub>3</sub>-PiMe<sub>2</sub>** (10 mol %), solvent (0.5 mL), 35 °C. <sup>b</sup> NMR yield detected by using CH<sub>2</sub>Br<sub>2</sub> as an internal standard. <sup>c</sup> Enantiomeric excess determined by HPLC analysis on a chiral stationary phase.

**Table S4. Investigation of Temperature.**
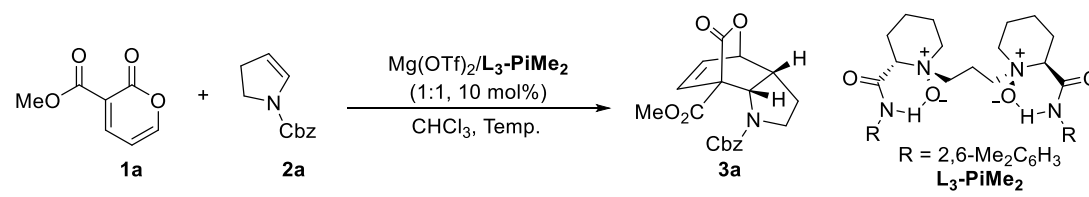

| Entry <sup>a</sup> | Temp. (°C) | Time (h) | Yield (%) <sup>b</sup> | ee (%) <sup>c</sup> |
|--------------------|------------|----------|------------------------|---------------------|
| 1                  | 35         | 3        | >99                    | 95                  |
| 2                  | 45         | 3        | 99                     | 88                  |
| 3                  | 25         | 4        | >99                    | 94                  |
| 5                  | 15         | 12       | >99                    | 95                  |
| 6                  | 5          | 12       | 59                     | 93                  |
| 7                  | -20        | 36       | trace                  | --                  |

<sup>a</sup> Reaction conditions: **1a** (0.10 mmol), **2a** (0.15 mmol, 1.5 equiv.), Mg(OTf)<sub>2</sub> (10 mol %), **L<sub>3</sub>-PiMe<sub>2</sub>** (10 mol %), CHCl<sub>3</sub> (0.5 mL), at indicated temperature. <sup>b</sup> NMR yield detected by using CH<sub>2</sub>Br<sub>2</sub> as an internal standard. <sup>c</sup> Enantiomeric excess determined by HPLC analysis on a chiral stationary phase.

**Table S5. Investigation of the Loading and Ratio of Catalyst.**

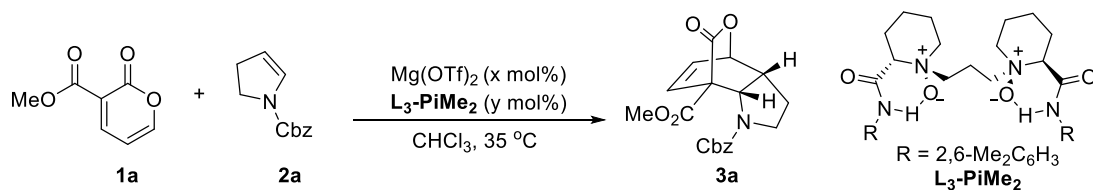

| Entry <sup>a</sup> | x  | y  | Time (h) | Yield (%) <sup>b</sup> | ee (%) <sup>c</sup> |
|--------------------|----|----|----------|------------------------|---------------------|
| 1                  | 10 | 10 | 3        | 99                     | 95                  |
| 2                  | 5  | 5  | 3        | 99                     | 95                  |
| 3                  | 2  | 2  | 12       | 99                     | 93                  |
| 4                  | 10 | 11 | 12       | 89                     | 95                  |
| 5                  | 10 | 9  | 12       | 90                     | 87                  |

<sup>a</sup> Reaction conditions: **1** (0.10 mmol), **2a** (0.15 mmol, 1.5 equiv.),  $\text{Mg}(\text{OTf})_2$  ( $x \text{ mol}\%$ ),  $\text{L}_3\text{-PiMe}_2$  ( $y \text{ mol}\%$ ),  $\text{CHCl}_3$  (0.5 mL),  $35^\circ\text{C}$ . <sup>b</sup> NMR yield detected by using  $\text{CH}_2\text{Br}_2$  as an internal standard. <sup>c</sup> Enantiomeric excess determined by HPLC analysis on a chiral stationary phase.

### 3. Preparation of Substrates

**Table S6. Structures of Substituted 2-pyrones.**

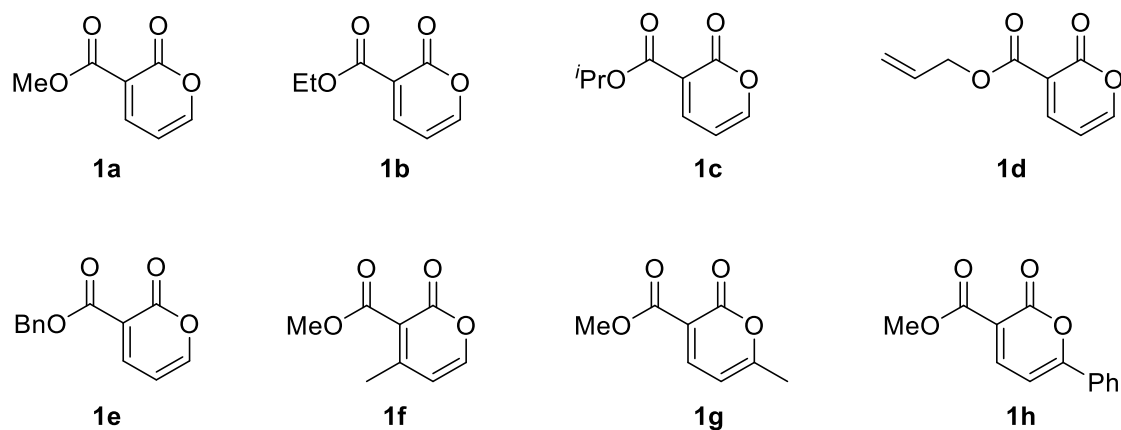

All 2-pyrones were prepared according to the literature.<sup>1</sup>

**Table S7. Structures of Substituted Enamines.**

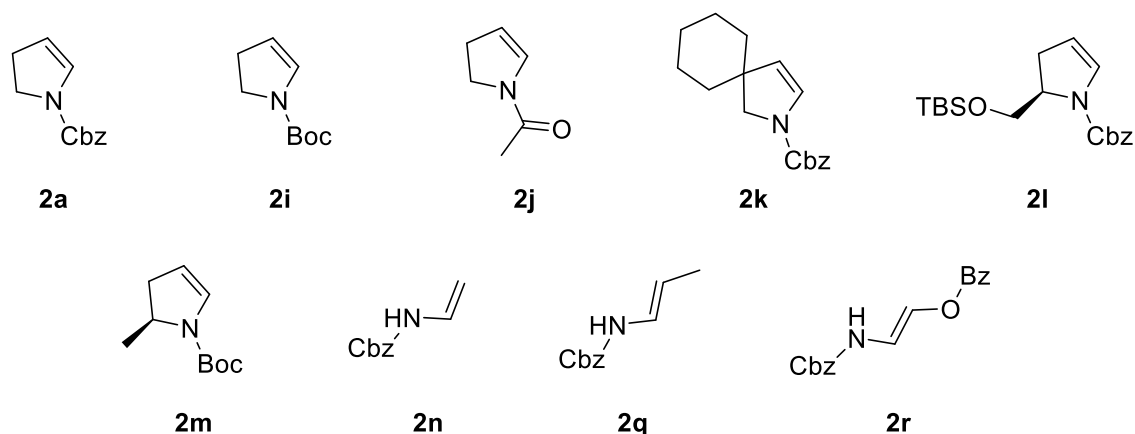

All enamines were prepared according to the literature.<sup>2-8</sup>

#### 4. General Procedure for the Catalytic Asymmetric Reaction

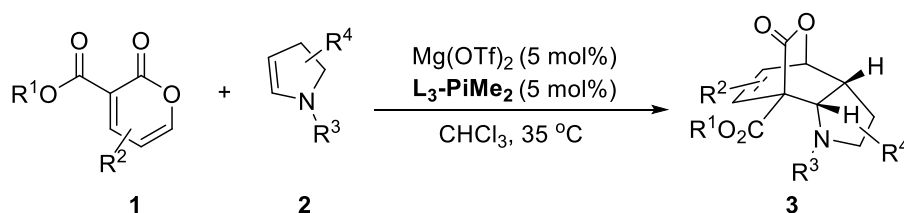

After stirring a mixture of  $\text{Mg}(\text{OTf})_2$  (0.005 mmol, 5 mol %) and **L3-PiMe<sub>2</sub>** (0.005 mmol, 5 mol %) in dry  $\text{CHCl}_3$  (0.5 mL) at 35 °C for 1 h under argon atmosphere, substrate **1** (0.10 mmol) and substrate **2** (0.15 mmol) were added, and then the reaction mixture was stirring at 35 °C. After the disappearance of substrate **1** (monitored by TLC), the crude product was purified by silica gel flash chromatography (EtOAc: petroleum ether 1: 3) to afford the desired product **3**.

#### 1-benzyl 7-methyl (**3aR,4R,7S,7aS**)-8-oxo-2,3,3a,7a-tetrahydro-1*H*-4,7-(epoxymethano)indole-1,7(**4H**)-dicarboxylate

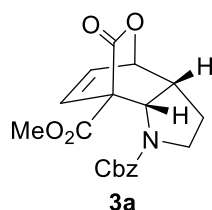

Following the general procedure, reaction time 3 h. Product **3a** was obtained as a white solid (35 mg, 99% yield, 95% ee). The enantiomeric excess was determined by CHIRALPAK AD-H (0.46 cm × 25 cm), hexanes/ethanol = 80/20, 1.0 mL/min,  $\lambda = 210$  nm, t

(minor) = 21.59 min, t (major) = 24.89 min.  $[\alpha]^{25}_D = -81.0$  ( $c = 0.23$ , in  $\text{CH}_2\text{Cl}_2$ ).  $^1\text{H}$  NMR (400 MHz,  $\text{CDCl}_3$ )  $\delta$  7.56 – 7.31 (m, 5H), 7.02 (d,  $J = 7.7$  Hz, 1H), 6.60 (dd,  $J = 7.8, 5.0$  Hz, 1H), 5.25 – 4.98 (m, 3H), 4.92 (d,  $J = 7.7$  Hz, 1H), 4.12 – 3.50 (m, 4H), 3.27 (dd,  $J = 11.6, 5.0$  Hz, 1H), 3.14 (td,  $J = 11.0, 7.5$  Hz, 1H), 2.12 (dd,  $J = 13.6, 10.4$  Hz, 1H), 1.81 – 1.55 (m, 1H).  $^{13}\text{C}$  NMR (100 MHz,  $\text{CDCl}_3$ )  $\delta$  167.7, 167.3, 154.4, 136.2, 133.0, 130.0, 128.5, 128.2, 128.0, 75.7, 67.4, 60.5, 59.5, 53.0, 48.0, 44.9, 25.9; HRMS (ESI): exact mass calculated for:  $\text{C}_{19}\text{H}_{19}\text{O}_6\text{NNa}$   $[\text{M}+\text{Na}]^+$ : 380.1105, found: 380.1103.

**1-benzyl 7-ethyl (3aR,4R,7S,7aS)-8-oxo-2,3,3a,7a-tetrahydro-1H-4,7-(epoxymethano)indole-1,7(4H)-dicarboxylate**

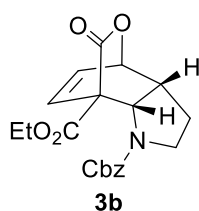

Following the general procedure, reaction time 12 h. Product **3b** was obtained as a white solid (32 mg, 86% yield, 88% ee). The enantiomeric excess was determined by CHIRALPAK AD-H (0.46 cm  $\times$  25 cm), hexanes/ethanol = 80/20, 1.0 mL/min,  $\lambda = 210$  nm, t

(minor) = 17.36 min, t (major) = 14.98 min.  $[\alpha]^{25}_D = -85.7$  ( $c = 0.14$ , in  $\text{CH}_2\text{Cl}_2$ ).  $^1\text{H}$  NMR (400 MHz,  $\text{CDCl}_3$ )  $\delta$  7.60 – 7.30 (m, 5H), 7.00 (d,  $J = 7.7$  Hz, 1H), 6.58 (d,  $J = 7.8$  Hz, 1H), 5.41 – 5.09 (m, 1H), 5.03 (d,  $J = 12.1$  Hz, 1H), 4.93 (d,  $J = 7.6$  Hz, 1H), 4.60 – 3.97 (m, 2H), 3.74 (t,  $J = 10.0$  Hz, 1H), 3.34 – 3.20 (m, 1H), 3.13 (td,  $J = 11.0, 7.4$  Hz, 1H), 2.09 (tt,  $J = 10.2, 8.1$  Hz, 1H), 1.64 (dd,  $J = 13.7, 7.4$  Hz, 1H), 1.47 – 1.16 (m, 3H).  $^{13}\text{C}$  NMR (101 MHz,  $\text{CDCl}_3$ )  $\delta$  167.9, 166.7, 154.4, 136.3, 133.1, 130.0, 128.5, 128.2, 128.0, 75.7, 67.3, 62.2, 60.4, 59.6, 48.1, 45.0, 25.8, 14.0. HRMS (ESI): exact mass calculated for:  $\text{C}_{20}\text{H}_{21}\text{O}_6\text{NNa}$   $[\text{M}+\text{Na}]^+$ : 394.1261, found: 394.1260.

**1-benzyl 7-isopropyl (3aR,4R,7S,7aS)-8-oxo-2,3,3a,7a-tetrahydro-1H-4,7-(epoxymethano)indole-1,7(4H)-dicarboxylate**

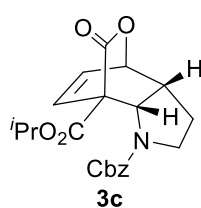

Following the general procedure, reaction time 12 h. Product **3c** was obtained as a white solid (27 mg, 70% yield, 92% ee). The enantiomeric excess was determined by CHIRALPAK OJ-H (0.46 cm  $\times$  25 cm), hexanes/ethanol = 80/20, 1.0 mL/min,  $\lambda = 210$  nm, t

(minor) = 25.29 min, t (major) = 19.05 min.  $[\alpha]^{25}_D = -71.4$  ( $c = 0.17$ , in  $\text{CH}_2\text{Cl}_2$ ).  $^1\text{H}$



NMR (400 MHz, CDCl<sub>3</sub>)  $\delta$  7.41 – 7.29 (m, 5H), 6.99 (d,  $J$  = 7.6 Hz, 1H), 6.57 (dd,  $J$  = 7.8, 5.0 Hz, 1H), 5.27 – 5.09 (m, 3H), 5.05 (d,  $J$  = 12.2 Hz, 1H), 4.92 (d,  $J$  = 7.6 Hz, 1H), 3.73 (t,  $J$  = 10.2 Hz, 1H), 3.30 – 3.19 (m, 1H), 3.13 (td,  $J$  = 11.0, 7.4 Hz, 1H), 2.16 – 1.99 (m, 1H), 1.64 (dd,  $J$  = 13.7, 7.3 Hz, 1H), 1.46 – 1.30 (m, 6H). <sup>13</sup>C NMR (100 MHz, CDCl<sub>3</sub>)  $\delta$  168.0, 166.1, 154.4, 136.4, 133.2, 129.9, 128.5, 128.1, 128.0, 75.6, 70.0, 67.2, 60.2, 59.7, 48.0, 45.0, 25.9, 21.6. HRMS (ESI): exact mass calculated for: C<sub>21</sub>H<sub>23</sub>O<sub>6</sub>NNa [M+Na]<sup>+</sup>: 408.1457, found: 408.1450.

**7-allyl 1-benzyl (3aR,4R,7S,7aS)-8-oxo-2,3,3a,7a-tetrahydro-1H-4,7-(epoxymethano)indole-1,7(4H)-dicarboxylate**

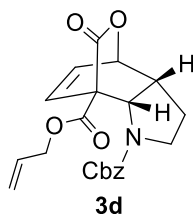

Following the general procedure, reaction time 12 h. Product **3d** was obtained as a white solid (22 mg, 60% yield, 89% ee). The enantiomeric excess was determined by CHIRALPAK AD-H (0.46 cm  $\times$  25 cm), hexanes/ethanol = 80/20, 1.0 mL/min,  $\lambda$  = 210 nm,  $t$  (minor) = 17.14 min,  $t$  (major) = 18.84 min.  $[\alpha]_D^{25} = -55.6$  ( $c$  = 0.14, in CH<sub>2</sub>Cl<sub>2</sub>). <sup>1</sup>H NMR (500 MHz, CDCl<sub>3</sub>)  $\delta$  7.41 – 7.28 (m, 5H), 6.99 (d,  $J$  = 7.5 Hz, 1H), 6.58 (dd,  $J$  = 7.8, 5.0 Hz, 1H), 6.01 (s, 1H), 5.43 (d,  $J$  = 16.9 Hz, 1H), 5.25 (d,  $J$  = 10.4 Hz, 1H), 5.18 – 5.07 (m, 2H), 5.02 (d,  $J$  = 11.9 Hz, 1H), 4.96 – 4.80 (m, 2H), 4.79 – 4.31 (m, 1H), 3.72 (s, 1H), 3.36 – 3.18 (m, 1H), 3.11 (td,  $J$  = 11.0, 7.4 Hz, 1H), 2.08 (tt,  $J$  = 10.2, 6.0 Hz, 1H), 1.63 (dd,  $J$  = 13.8, 7.4 Hz, 1H). <sup>13</sup>C NMR (126 MHz, CDCl<sub>3</sub>)  $\delta$  167.7, 166.7, 154.4, 136.3, 132.9, 132.1, 130.1, 128.5, 128.2, 128.0, 118.2, 75.7, 67.3, 66.7, 60.5, 59.6, 48.0, 44.9, 25.8. HRMS (ESI): exact mass calculated for: C<sub>21</sub>H<sub>21</sub>O<sub>6</sub>NNa [M+Na]<sup>+</sup>: 406.1261, found: 406.1267.

**Dibenzyl (3aR,4R,7S,7aS)-8-oxo-2,3,3a,7a-tetrahydro-1H-4,7-(epoxymethano)indole-1,7(4H)-dicarboxylate**

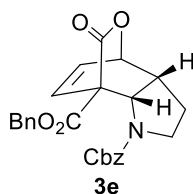

Following the general procedure, reaction time 12 h. Product **3e** was obtained as a colorless oil (35 mg, 80% yield, 86% ee). The enantiomeric excess was determined by CHIRALPAK AD-H (0.46 cm  $\times$  25 cm), hexanes/ethanol = 80/20 1.0 mL/min,  $\lambda$  = 210 nm,  $t$

(minor) = 23.63 min, t (major) = 32.80 min.  $[\alpha]^{25}_D = -44.4$  ( $c = 0.32$ , in  $\text{CH}_2\text{Cl}_2$ ).  $^1\text{H}$  NMR (500 MHz,  $\text{CDCl}_3$ )  $\delta$  7.39 (s, 2H), 7.31 – 7.18 (m, 8H), 6.92 (d,  $J = 7.5$  Hz, 1H), 6.47 (dd,  $J = 7.8, 5.0$  Hz, 1H), 5.33 (s, 1H), 5.01 (dt,  $J = 22.8, 9.8$  Hz, 4H), 4.84 (d,  $J = 7.6$  Hz, 1H), 3.62 (s, 1H), 3.14 (s, 1H), 3.09 – 2.96 (m, 1H), 2.07 – 1.88 (m, 1H), 1.53 (dd,  $J = 13.8, 7.4$  Hz, 1H).  $^{13}\text{C}$  NMR (101 MHz,  $\text{CDCl}_3$ )  $\delta$  167.8, 166.8, 154.5, 136.4, 135.9, 132.9, 130.2, 128.6, 128.5, 128.2, 128.2, 128.1, 75.8, 67.9, 67.4, 60.7, 59.7, 48.1, 45.0, 25.8. HRMS (ESI): exact mass calculated for:  $\text{C}_{25}\text{H}_{23}\text{O}_6\text{NNa}$   $[\text{M}+\text{Na}]^+$ : 456.1423, found: 456.1418.

**Benzyl (3a*R*,4*R*,7*S*,7a*S*)-6-methyl-7-((methylperoxy)- $\lambda^2$ -methyl)-8-oxo-2,3,3a,4,7,7a-hexahydro-1*H*-4,7-(epoxymethano)indole-1-carboxylate**

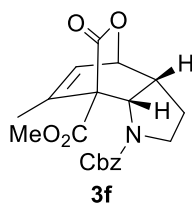

Following the general procedure, reaction time 12 h. Product **3f** was obtained as a white solid (34 mg, 90% yield, 89% ee). The enantiomeric excess was determined by CHIRALPAK AD-H (0.46 cm  $\times$  25 cm), hexanes/ethanol = 80/20, 1.0 mL/min,  $\lambda = 210$  nm, t

(minor) = 18.71 min, t (major) = 15.46 min.  $[\alpha]^{25}_D = -90.7$  ( $c = 0.19$ , in  $\text{CH}_2\text{Cl}_2$ ).  $^1\text{H}$  NMR (400 MHz,  $\text{CDCl}_3$ )  $\delta$  7.39 – 7.29 (m, 5H), 6.57 – 5.83 (m, 1H), 5.19 (d,  $J = 12.4$  Hz, 1H), 5.08 – 4.92 (m, 3H), 3.83 (s, 3H), 3.70 (t,  $J = 10.2$  Hz, 1H), 3.25 – 3.12 (m, 1H), 3.07 (td,  $J = 10.9, 7.4$  Hz, 1H), 2.15 – 2.03 (m, 4H), 1.65 (dd,  $J = 13.7, 7.4$  Hz, 1H).  $^{13}\text{C}$  NMR (100 MHz,  $\text{CDCl}_3$ )  $\delta$  167.0, 167.5, 154.4, 143.4, 136.3, 128.5, 128.2, 128.0, 124.5, 75.1, 67.3, 61.9, 60.8, 52.3, 48.0, 44.9, 25.8, 20.3. HRMS (ESI): exact mass calculated for:  $\text{C}_{20}\text{H}_{21}\text{O}_6\text{NNa}$   $[\text{M}+\text{Na}]^+$ : 394.1261, found: 394.1263.

**1-benzyl 7-methyl (3a*R*,4*R*,7*S*,7a*S*)-4-methyl-8-oxo-2,3,3a,7a-tetrahydro-1*H*-4,7-(epoxymethano)indole-1,7(4*H*)-dicarboxylate**

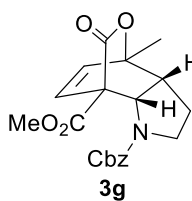

Following the general procedure, reaction time 12 h. Product **3g** was obtained as a white solid (32 mg, 86% yield, 94% ee). The enantiomeric excess was determined by CHIRALPAK AD-H (0.46 cm  $\times$  25 cm), hexanes/ethanol = 80/20, 1.0 mL/min,  $\lambda = 210$  nm, t

(minor) = 32.09 min, t (major) = 25.16 min.  $[\alpha]^{25}_D = -114.6$  ( $c = 0.27$ , in  $\text{CH}_2\text{Cl}_2$ ).  $^1\text{H}$

NMR (400 MHz, CDCl<sub>3</sub>)  $\delta$  7.53 – 7.27 (m, 5H), 6.92 (d,  $J$  = 7.8 Hz, 1H), 6.30 (d,  $J$  = 7.9 Hz, 1H), 5.07 (dd,  $J$  = 40.5, 12.3 Hz, 2H), 4.93 (d,  $J$  = 7.7 Hz, 1H), 3.86 (d,  $J$  = 23.9 Hz, 3H), 3.70 (t,  $J$  = 10.2 Hz, 1H), 3.11 (td,  $J$  = 10.9, 7.3 Hz, 1H), 3.03 – 2.89 (m, 1H), 2.04 (dq,  $J$  = 13.8, 10.2 Hz, 1H), 1.70 (s, 3H), 1.64 (dd,  $J$  = 13.8, 7.3 Hz, 1H); <sup>13</sup>C NMR (101 MHz, CDCl<sub>3</sub>)  $\delta$  168.2, 167.4, 154.5, 136.3, 134.4, 131.9, 128.5, 128.2, 128.0, 82.7, 67.4, 61.98, 59.5, 53.0, 50.7, 47.9, 26.1, 20.9. HRMS (ESI): exact mass calculated for: C<sub>20</sub>H<sub>21</sub>O<sub>6</sub>NNa [M+Na]<sup>+</sup>: 394.1261, found: 394.1261.

**1-(tert-butyl) 7-methyl (3a*R*,4*R*,7*S*,7a*S*)-8-oxo-2,3,3a,7a-tetrahydro-1*H*-4,7-(epoxymethano)indole-1,7(4*H*)-dicarboxylate**

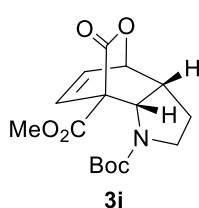

Following the general procedure, reaction time 24 h. Product **3i** was obtained as a white solid (26 mg, 80% yield, 94% *ee*). The enantiomeric excess was determined by CHIRALPAK OD-H (0.46 cm × 25 cm), hexanes/ethanol = 80/20, 1.0 mL/min,  $\lambda$  = 210 nm, *t* (minor) = 7.23 min, *t* (major) = 6.04 min.  $[\alpha]^{25}_D = -121.8$  ( $c$  = 0.11, in CH<sub>2</sub>Cl<sub>2</sub>). <sup>1</sup>H NMR (500 MHz, CDCl<sub>3</sub>)  $\delta$  6.97 (d,  $J$  = 7.5 Hz, 1H), 6.55 (dd,  $J$  = 7.9, 5.0 Hz, 1H), 5.15 – 5.08 (m, 1H), 4.84 (d,  $J$  = 7.7 Hz, 1H), 3.90 (s, 3H), 3.59 (s, 1H), 3.26 – 3.19 (m, 1H), 3.03 (td,  $J$  = 11.0, 7.4 Hz, 1H), 2.06 (m,  $J$  = 13.5, 10.3, 2.6 Hz, 1H), 1.58 (dd,  $J$  = 13.7, 7.4 Hz, 1H), 1.40 (s, 9H). <sup>13</sup>C NMR (101 MHz, CDCl<sub>3</sub>)  $\delta$  167.9, 167.3, 153.9, 133.1, 130.1, 80.5, 75.8, 60.3, 59.5, 53.2, 47.9, 44.5, 28.3, 26.1. HRMS (ESI): exact mass calculated for: C<sub>16</sub>H<sub>21</sub>O<sub>6</sub>NNa [M+Na]<sup>+</sup>: 346.1261, found: 346.1260.

**Methyl (3a*R*,4*R*,7*S*,7a*S*)-1-acetyl-8-oxo-1,2,3,3a,4,7a-hexahydro-7*H*-4,7-(epoxymethano)indole-7-carboxylate**

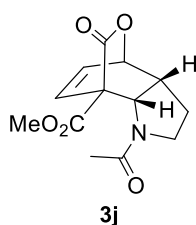

Following the general procedure, Mg(OTf)<sub>2</sub> (10 mol%), **L3-PiMe<sub>2</sub>** (10 mol%), **1a** (0.1 mmol) and **2j** (0.15 mmol) reacted for 24 h. Product **3j** was obtained as a white solid (25 mg, 92% yield, 87% *ee*). The enantiomeric excess was determined by CHIRALPAK OD-H (0.46 cm × 25 cm), hexanes/ethanol = 80/20, 1.0 mL/min,  $\lambda$  = 210 nm, *t* (minor) = 12.39 min, *t* (major) = 10.29 min.  $[\alpha]^{25}_D = -136.4$  ( $c$  = 0.11, in CH<sub>2</sub>Cl<sub>2</sub>). <sup>1</sup>H NMR (400 MHz,

CDCl<sub>3</sub>)  $\delta$  6.98 (d,  $J$  = 7.7 Hz, 1H), 6.57 (d,  $J$  = 2.7 Hz, 1H), 5.12 (s, 1H), 4.96 (d,  $J$  = 7.6 Hz, 1H), 3.93 (s, 3H), 3.50 (t,  $J$  = 10.0 Hz, 1H), 3.24 (dd,  $J$  = 17.9, 10.3 Hz, 2H), 2.15 (dq,  $J$  = 20.6, 10.2 Hz, 1H), 1.96 (s, 3H), 1.71 (dd,  $J$  = 13.7, 7.3 Hz, 1H). <sup>13</sup>C NMR (101 MHz, CDCl<sub>3</sub>)  $\delta$  169.7, 167.8, 167.6, 133.4, 129.9, 75.6, 59.7, 59.1, 53.2, 49.0, 44.3, 26.1, 23.3. HRMS (ESI): exact mass calculated for: C<sub>13</sub>H<sub>15</sub>O<sub>5</sub>NNa [M+Na]<sup>+</sup>: 288.0842, found: 288.0842.

**1'-benzyl 7'-methyl (3a'R,4'R,7'S,7a'S)-8'-oxo-3a',7a'-dihydrospiro[cyclohexane-1,3'-[4,7](epoxymethano)indole]-1',7'(2'H,4'H)-dicarboxylate**

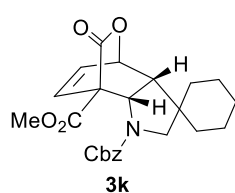

Following the general procedure, Mg(OTf)<sub>2</sub> (10 mol%), L<sub>3</sub>-PiMe<sub>2</sub> (10 mol%), **1a** (0.1 mmol) and **2k** (0.15 mmol) reacted for 36 h. Product **3k** was obtained as a white solid (34 mg, 79% yield, 85% *ee*). The enantiomeric excess was determined by CHIRALPAK

OD-H (0.46 cm × 25 cm), hexanes/ethanol = 80/20, 1.0 mL/min,  $\lambda$  = 210 nm, *t* (minor) = 16.42 min, *t* (major) = 9.15 min.  $[\alpha]^{25}_D = -85.0$  ( $c$  = 0.11, in CH<sub>2</sub>Cl<sub>2</sub>). <sup>1</sup>H NMR (500 MHz, CDCl<sub>3</sub>)  $\delta$  7.42 – 7.27 (m, 5H), 6.99 (d,  $J$  = 7.5 Hz, 1H), 6.57 (d,  $J$  = 4.7 Hz, 1H), 5.45 – 4.86 (m, 4H), 3.90 (d,  $J$  = 74.1 Hz, 3H), 3.64 (d,  $J$  = 10.7 Hz, 1H), 3.55 (s, 1H), 2.87 (d,  $J$  = 4.4 Hz, 1H), 2.81 (d,  $J$  = 11.2 Hz, 1H), 1.47 (dd,  $J$  = 76.4, 28.8 Hz, 10H). <sup>13</sup>C NMR (126 MHz, CDCl<sub>3</sub>)  $\delta$  168.3, 167.6, 155.1, 136.6, 132.8, 130.0, 128.7, 128.4, 127.8, 74.3, 67.4, 60.4, 59.4, 57.7, 54.7, 53.3, 42.5, 37.2, 32.0, 25.9, 23.6, 22.3. HRMS (ESI): exact mass calculated for: C<sub>24</sub>H<sub>27</sub>O<sub>6</sub>NNa [M+Na]<sup>+</sup>: 448.1731, found: 448.1731.

**1-benzyl 7-methyl (2R,3aR,4R,7S,7aS)-2-(((tert-butyldimethylsilyl)oxy)methyl)-8-oxo-2,3,3a,7a-tetrahydro-1H-4,7-(epoxymethano)indole-1,7(4H)-dicarboxylate**

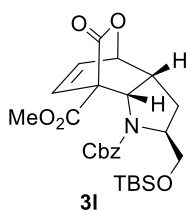

Following the general procedure, reaction time 24 h. Product **3l** was obtained as a colorless oil (44 mg, 88% yield, *dr* > 20:1).  $[\alpha]^{25}_D = -89.1$  ( $c$  = 0.12, in CH<sub>2</sub>Cl<sub>2</sub>). <sup>1</sup>H NMR (500 MHz, CDCl<sub>3</sub>)  $\delta$  7.38 – 7.26 (m, 5H), 6.84 (d,  $J$  = 7.6 Hz, 1H), 6.47 (dd,  $J$  = 7.8, 5.0 Hz, 1H), 5.20 – 4.90 (m, 3H), 4.69 (d,  $J$  = 8.0 Hz, 1H), 4.12 – 4.03 (m, 1H), 3.90 (s, 3H), 3.63 (s, 1H), 3.48 (dd,  $J$  = 10.2, 2.6 Hz, 1H), 3.24 – 3.15 (m, 1H), 2.09 – 1.98 (m, 1H), 1.48 (ddd,  $J$

= 13.3, 8.8, 7.4 Hz, 1H), 0.85 (s, 9H), -0.03 (d,  $J = 2.2$  Hz, 6H).  $^{13}\text{C}$  NMR (126 MHz,  $\text{CDCl}_3$ )  $\delta$  169.3, 168.1, 153.7, 136.4, 132.6, 128.8, 128.6, 128.3, 128.3, 75.6, 67.2, 65.3, 61.5, 60.8, 60.0, 52.7, 45.4, 28.1, 26.0, 18.3, -5.4, -5.5. HRMS (ESI): exact mass calculated for:  $\text{C}_{26}\text{H}_{35}\text{O}_7\text{NSiNa}$   $[\text{M}+\text{Na}]^+$ : 524.2075, found: 524.2076.

**1-(tert-butyl) 7-methyl (2*S*,3*aR*,4*R*,7*S*,7*aS*)-2-methyl-8-oxo-2,3,3*a*,7*a*-tetrahydro-1*H*-4,7-(epoxymethano)indole-1,7(4*H*)-dicarboxylate**

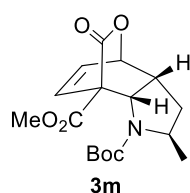

Following the general procedure, reaction time 36 h. Product **3m** was obtained as a white solid (29 mg, 86% yield, dr > 20:1).  $[\alpha]^{25}\text{D} = -92.5$  ( $c = 0.12$ , in  $\text{CH}_2\text{Cl}_2$ ).  $^1\text{H}$  NMR (400 MHz,  $\text{CDCl}_3$ )  $\delta$  6.88 – 6.80 (m, 1H), 6.46 (dd,  $J = 7.8, 5.0$  Hz, 1H), 5.02 (ddd,  $J = 5.1, 3.5, 1.8$  Hz, 1H), 4.62 (d,  $J = 7.9$  Hz, 1H), 3.87 (s, 3H), 3.86 – 3.79 (m, 1H), 3.16 – 3.05 (m, 1H), 1.73 – 1.57 (m, 2H), 1.37 (s, 9H), 1.10 (d,  $J = 6.3$  Hz, 3H).  $^{13}\text{C}$  NMR (101 MHz,  $\text{CDCl}_3$ )  $\delta$  169.0, 167.7, 153.6, 132.9, 128.8, 80.2, 75.5, 60.2, 58.8, 55.6, 52.7, 43.6, 33.3, 28.3, 21.3. HRMS (ESI): exact mass calculated for:  $\text{C}_{17}\text{H}_{23}\text{O}_6\text{NNa}$   $[\text{M}+\text{Na}]^+$ : 360.1418, found: 360.1418.

**Methyl (1*S*,4*S*,8*S*)-8-(((benzyloxy)carbonyl)amino)-3-oxo-2-oxabicyclo[2.2.2]oct-5-ene-4-carboxylate**

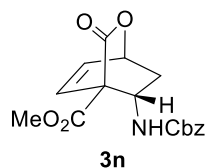

Following the general procedure,  $\text{Mg}(\text{OTf})_2$  (10 mol%),  $\text{L}_3\text{-PiMe}_2$  (10 mol%), **1a** (0.1 mmol) and **2n** (0.15 mmol) reacted for 24 h. Product **3n** was obtained as a colorless oil (27 mg, 80% yield, 92% *ee*). The enantiomeric excess was determined by CHIRALPAK ID (0.46 cm  $\times$  25 cm), hexanes/*i*PrOH = 70/30, 1.0 mL/min,  $\lambda = 210$  nm,  $t$  (minor) = 69.45 min,  $t$  (major) = 28.27 min.  $[\alpha]^{25}\text{D} = -25.5$  ( $c = 0.44$ , in  $\text{CH}_2\text{Cl}_2$ ).  $^1\text{H}$  NMR (500 MHz,  $\text{CDCl}_3$ )  $\delta$  7.33 (d,  $J = 11.8$  Hz, 5H), 6.90 – 6.79 (m, 1H), 6.73 (dd,  $J = 7.8, 5.1$  Hz, 1H), 5.25 (d,  $J = 1.6$  Hz, 1H), 5.06 (s, 2H), 4.93 – 4.77 (m, 1H), 4.63 (d,  $J = 9.9$  Hz, 1H), 3.83 (s, 3H), 2.86 (d,  $J = 10.0$  Hz, 1H), 1.55 (dd,  $J = 14.4, 2.2$  Hz, 1H).  $^{13}\text{C}$  NMR (100 MHz,  $\text{CDCl}_3$ )  $\delta$  168.3, 167.1, 155.0, 135.9, 133.6, 129.6, 128.7, 128.6, 128.5, 128.3,

73.7, 67.3, 59.7, 53.3, 46.7, 36.9. HRMS (ESI): exact mass calculated for:  $C_{17}H_{17}O_6NNa$   $[M+Na]^+$ : 354.0954, found: 354.0948.

**Benzyl ((1*S*,4*S*,5*S*)-8-methyl-4-((methylperoxy)- $\lambda^2$ -methyl)-3-oxo-2-oxabicyclo[2.2.2]oct-7-en-5-yl)carbamate**

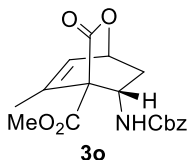

Following the general procedure,  $Mg(OTf)_2$  (10 mol%), **L3-PiMe2** (10 mol%), **1f** (0.1 mmol) and **2n** (0.15 mmol) reacted for 36 h. Product **3o** was obtained as a colorless oil (28 mg, 82% yield, 90%

*ee*). The enantiomeric excess was determined by CHIRALPAK OD-H (0.46 cm  $\times$  25 cm), hexanes/ethanol = 80/20, 1.0 mL/min,  $\lambda$  = 210 nm, *t* (minor) = 6.84 min, *t* (major) = 7.40 min.  $[\alpha]^{25}_D = -20.3$  ( $c$  = 1.8, in  $CH_2Cl_2$ ).  $^1H$  NMR (400 MHz,  $CDCl_3$ )  $\delta$  7.32 (d,  $J$  = 1.8 Hz, 5H), 6.30 (d,  $J$  = 3.6 Hz, 1H), 5.17 – 4.96 (m, 3H), 4.91 – 4.78 (m, 1H), 4.64 (d,  $J$  = 9.4 Hz, 1H), 3.80 (s, 3H), 2.81 – 2.63 (m, 1H), 2.08 (d,  $J$  = 1.5 Hz, 3H), 1.55 (d,  $J$  = 14.3 Hz, 1H).  $^{13}C$  NMR (101 MHz,  $CDCl_3$ )  $\delta$  168.9, 166.8, 155.3, 139.1, 136.1, 128.6, 128.4, 128.3, 127.5, 72.8, 67.3, 62.7, 52.8, 46.9, 36.8, 20.8. HRMS (ESI): exact mass calculated for:  $C_{18}H_{19}O_6NNa$   $[M+Na]^+$ : 368.1105, found: 368.1103.

**Benzyl (*S*)-(5-methyl-2-((methylperoxy)- $\lambda^2$ -methyl)cyclohexa-2,4-dien-1-yl)carbamate**

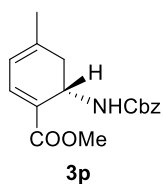

Following the general procedure,  $Mg(OTf)_2$  (10 mol%), **L3-PiMe2** (10 mol%), **1g** (0.1 mmol) and **2n** (0.15 mmol) reacted for 36 h at 35°C. After that, evaporate the solvent and add PhCl (1 mL) to the residue, then heat to 110 °C and stir for 2 h. Product **3p** was obtained as a

colorless oil (25 mg, 83% yield, 92% *ee*). The enantiomeric excess was determined by CHIRALPAK OD-H (0.46 cm  $\times$  25 cm), hexanes/ethanol = 80/20, 1.0 mL/min,  $\lambda$  = 210 nm, *t* (minor) = 15.27 min, *t* (major) = 13.37 min.  $[\alpha]^{25}_D = -96.3$  ( $c$  = 0.13, in  $CH_2Cl_2$ ).  $^1H$  NMR (400 MHz,  $CDCl_3$ )  $\delta$  7.51 – 7.24 (m, 5H), 7.14 (d,  $J$  = 5.8 Hz, 1H), 5.91 (dd,  $J$  = 4.5, 1.3 Hz, 1H), 5.07 (s, 2H), 4.81 (d,  $J$  = 6.6 Hz, 2H), 3.73 (s, 3H), 2.52 (d,  $J$  = 8.6 Hz, 2H), 1.88 (s, 3H).  $^{13}C$  NMR (126 MHz,  $CDCl_3$ )  $\delta$  166.9, 155.4, 144.5, 136.8, 128.6, 128.2, 123.6, 118.6, 66.8, 51.9, 42.7, 36.8, 24.1. HRMS (ESI): exact mass calculated for:  $C_{17}H_{19}O_4NNa$   $[M+Na]^+$ : 324.1206, found: 324.1208.

**Methyl (1R,4S,7S,8S)-8-(((benzyloxy)carbonyl)amino)-7-methyl-3-oxo-2-oxabicyclo[2.2.2]oct-5-ene-4-carboxylate**

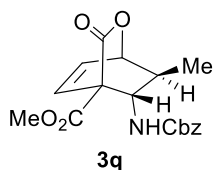

Following the general procedure, using  $\text{Mg}(\text{OTf})_2$  (5 mol%),  $\text{L}_3\text{-PiMe}_2$  (5 mol%), **1a** (0.2 mmol), benzyl (*E*)-prop-1-en-1-ylcarbamate (0.4 mmol), reaction time 24 h. Product **3q** was obtained as a colorless oil (56 mg, 82% yield, 86% *ee*). The enantiomeric excess was determined by CHIRALPAK AD-H (0.46 cm  $\times$  25 cm), hexanes/ethanol = 80/20, 1.0 mL/min,  $\lambda = 210$  nm,  $t$  (minor) = 14.94 min,  $t$  (major) = 10.81 min.  $[\alpha]^{25}_{\text{D}} = -44.7$  ( $c = 1.13$ , in  $\text{CH}_2\text{Cl}_2$ ).  $^1\text{H}$  NMR (400 MHz,  $\text{CDCl}_3$ )  $\delta$  7.37 (s, 5H), 6.80 (d,  $J = 7.8$  Hz, 1H), 6.75 (dd,  $J = 8.0, 4.9$  Hz, 1H), 5.17 – 5.01 (m, 2H), 4.92 (d,  $J = 5.0$  Hz, 1H), 4.72 (d,  $J = 10.0$  Hz, 1H), 4.30 (d,  $J = 10.0$  Hz, 1H), 3.81 (s, 3H), 1.83 – 1.77 (m, 1H), 1.38 (d,  $J = 7.1$  Hz, 3H).  $^{13}\text{C}$  NMR (100 MHz,  $\text{CDCl}_3$ )  $\delta$  168.3, 167.2, 155.3, 136.0, 134.4, 128.7, 128.5, 128.3, 78.9, 67.3, 59.9, 54.1, 53.2, 43.7, 17.0. HRMS (ESI): exact mass calculated for:  $\text{C}_{18}\text{H}_{19}\text{O}_6\text{NNa}$   $[\text{M}+\text{Na}]^+$ : 368.1105, found: 368.1100.

**Methyl (1R,4S,7S,8R)-7-(benzyloxy)-8-(((benzyloxy)carbonyl)amino)-3-oxo-2-oxabicyclo[2.2.2]oct-5-ene-4-carboxylate**

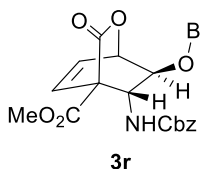

Following the general procedure,  $\text{Mg}(\text{OTf})_2$  (10 mol%),  $\text{L}_3\text{-PiMe}_2$  (10 mol%), **1a** (0.2 mmol) and benzyl (*E*)-prop-1-en-1-ylcarbamate (0.3 mmol) reacted for 48 h. Product **3r** was obtained as a yellow solid (36 mg, 40% yield, 92% *ee*). The enantiomeric excess was determined by CHIRALPAK OD-H (0.46 cm  $\times$  25 cm), hexanes/ethanol = 80/20, 1.0 mL/min,  $\lambda = 210$  nm,  $t$  (minor) = 8.17 min,  $t$  (major) = 9.15 min.  $[\alpha]^{25}_{\text{D}} = +83.92$  ( $c = 0.37$ , in  $\text{CH}_2\text{Cl}_2$ ).  $^1\text{H}$  NMR (400 MHz,  $\text{CDCl}_3$ )  $\delta$  7.93 (d,  $J = 7.3$  Hz, 2H), 7.64 (t,  $J = 7.5$  Hz, 1H), 7.43 (t,  $J = 7.5$  Hz, 2H), 7.29 (d,  $J = 8.3$  Hz, 4H), 7.15 (d,  $J = 6.1$  Hz, 1H), 7.08 (d,  $J = 7.6$  Hz, 1H), 6.76 (dd,  $J = 7.7, 5.1$  Hz, 1H), 5.73 (dd,  $J = 7.6, 3.6$  Hz, 1H), 5.46 (s, 1H), 5.30 – 5.11 (m, 1H), 4.98 (s, 2H), 4.67 (d,  $J = 10.8$  Hz, 1H), 3.91 (s, 3H).  $^{13}\text{C}$  NMR (101 MHz,  $\text{CDCl}_3$ )  $\delta$  166.7, 166.2, 164.6, 155.2, 135.6, 134.0, 131.6, 131.5, 129.7, 128.7,

128.5, 128.3, 128.1, 72.8, 68.2, 67.5, 59.2, 53.5, 50.2. HRMS (ESI): exact mass calculated for: C<sub>24</sub>H<sub>22</sub>O<sub>8</sub>N [M+H]<sup>+</sup>: 452.1340, found: 452.1340.

### Methyl (3*aS*,4*R*,7*S*,7*aS*)-8-oxo-2,3,3*a*,7*a*-tetrahydro-4,7-(epoxymethano)benzofuran-7(4*H*)-carboxylate

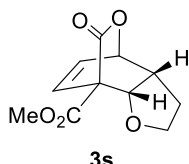

Following the general procedure, Mg(OTf)<sub>2</sub> (10 mol%), L<sub>3</sub>-PiMe<sub>2</sub> (10 mol%), **1a** (0.1 mmol) and 2,3-dihydrofuran (0.2 mmol) were reacted for 36 h. Product **3s** was obtained as a colorless oil (21 mg, 94% yield, 70% *ee*). The enantiomeric excess was determined by CHIRALPAK OD-H (0.46 cm × 25 cm), hexanes/ethanol = 90/10, 1.0 mL/min, λ = 210 nm, t (minor) = 14.25 min, t (major) = 16.09 min. [α]<sup>25</sup><sub>D</sub> = +40.0 (*c* = 0.42, in CH<sub>2</sub>Cl<sub>2</sub>). <sup>1</sup>H NMR (400 MHz, CDCl<sub>3</sub>) δ 6.84 – 6.76 (m, 1H), 6.55 (dd, *J* = 7.9, 5.0 Hz, 1H), 5.26 – 5.22 (m, 1H), 4.86 (d, *J* = 7.8, 1H), 3.93 (s, 3H), 3.92 – 3.86 (m, 1H), 3.79 – 3.73 (m, 1H), 3.22 – 3.15 (m, 1H), 2.17 – 2.08 (m, 1H), 1.57 – 1.49 (m, 1H). <sup>13</sup>C NMR (101 MHz, CDCl<sub>3</sub>) δ 168.3, 167.5, 131.7, 129.7, 78.6, 76.5, 70.8, 61.7, 53.4, 45.3, 28.2. HRMS (ESI): exact mass calculated for: C<sub>11</sub>H<sub>12</sub>O<sub>5</sub>Na [M+Na]<sup>+</sup>: 247.0577, found: 247.0575.

## 5. Procedure for Transformation of Product

### 1-benzyl 6-methyl (3*aR*,4*R*,4*aS*,5*aR*,6*S*,6*aS*)-7-oxooctahydro-4,6-(epoxymethano)cyclopropa[f]indole-1,6-dicarboxylate

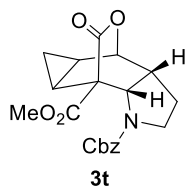

**3a** (21.4 mg, 0.06 mmol) and palladium acetate (20 mol%) were dissolved in DCM (5 mL), an excess of ethereal diazomethane (~ 10 equiv.) was added slowly at 0 °C. The solution was stirred at rt for 16 h until the yellow color disappeared. The solvent was removed under reduced pressure and the residue was purified by flash chromatography directly on silica gel (petroleum ether: ethyl acetate = 2:1) to obtain **3t** as a white solid (15 mg, 68% yield, 96% *ee*). The enantiomeric excess was determined by CHIRALPAK OD-H (0.46 cm × 25 cm), hexanes/ethanol = 80/20, 1.0 mL/min, λ = 210 nm, t (minor) = 14.58 min, t (major) = 18.78 min. [α]<sup>25</sup><sub>D</sub> = –110.0 (*c* = 0.10, in CH<sub>2</sub>Cl<sub>2</sub>). <sup>1</sup>H NMR (400 MHz, CDCl<sub>3</sub>)



$\delta$  7.48 – 7.28 (m, 5H), 5.09 (d,  $J = 47.8$  Hz, 2H), 4.76 (d,  $J = 8.6$  Hz, 1H), 4.68 (s, 1H), 3.87 (d,  $J = 76.9$  Hz, 4H), 3.45 (td,  $J = 11.2, 7.3$  Hz, 1H), 3.14 – 2.99 (m, 1H), 2.14 (m,  $J = 21.1, 10.4$  Hz, 1H), 1.78 (m,  $J = 21.7, 10.9, 5.6$  Hz, 2H), 1.34 (td,  $J = 7.8, 3.9$  Hz, 1H), 0.79 (q,  $J = 7.8$  Hz, 1H), 0.54 (dt,  $J = 7.2, 3.7$  Hz, 1H).  $^{13}\text{C}$  NMR (101 MHz,  $\text{CDCl}_3$ )  $\delta$  168.9, 167.7, 154.6, 136.3, 128.6, 128.0, 74.3, 67.5, 60.0, 57.3, 52.9, 48.2, 43.6, 25.4, 10.2, 7.7, 3.0. HRMS (ESI): exact mass calculated for:  $\text{C}_{20}\text{H}_{21}\text{O}_6\text{NNa}$   $[\text{M}+\text{Na}]^+$ : 394.1261, found: 394.1262.

### 1-benzyl 7-methyl (3a*S*,7a*S*)-2,3,3a,7a-tetrahydro-1*H*-indole-1,7-dicarboxylate

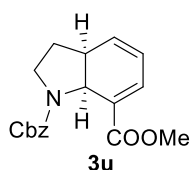

**3a** (35.7 mg, 0.1 mmol) was dissolved in chlorobenzene (1.0 mL), then warmed to 130 °C and stirred for 12 h. The solvent was removed under reduced pressure and the residue was purified by flash chromatography directly on silica gel (petroleum ether: ethyl acetate = 6:1) to obtain **3u** as a colorless oil (24 mg, 74% yield, 96% *ee*). The enantiomeric excess was determined by CHIRALPAK OD-H (0.46 cm  $\times$  25 cm), hexanes/ ethanol = 80/20, 1.0 mL/min,  $\lambda = 210$  nm,  $t$  (minor) = 6.09 min,  $t$  (major) = 5.52 min.  $[\alpha]^{25}\text{D} = -29.0$  ( $c = 1.2$ , in  $\text{CH}_2\text{Cl}_2$ ).  $^1\text{H}$  NMR (400 MHz, DMSO)  $\delta$  7.42 – 7.14 (m, 5H), 6.81 (d,  $J = 5.0$  Hz, 1H), 6.18 – 6.07 (m, 1H), 5.90 (d,  $J = 9.1$  Hz, 1H), 4.92 (s, 2H), 4.49 (d,  $J = 6.8$  Hz, 1H), 3.52 (dd,  $J = 37.2, 27.9$  Hz, 4H), 3.08 (s, 1H), 2.98 (d,  $J = 6.4$  Hz, 1H), 2.27 – 2.11 (m, 1H), 2.07 (dd,  $J = 12.0, 6.5$  Hz, 1H).  $^{13}\text{C}$  NMR (101 MHz, DMSO)  $\delta$  167.7, 154.0, 137.5, 136.0, 131.9, 128.8, 128.2, 128.0, 127.9, 124.1, 66.2, 52.2, 51.8, 46.6, 39.5, 30.2. HRMS (ESI): exact mass calculated for:  $\text{C}_{18}\text{H}_{19}\text{O}_4\text{NNa}$   $[\text{M}+\text{Na}]^+$ : 336.1212, found: 336.1204.

### 1-benzyl 7-methyl (3a*S*,4*R*,7*R*,7a*S*)-4-methyl-2,3,3a,4,7,7a-hexahydro-1*H*-indole-1,7-dicarboxylate

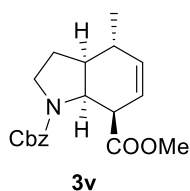

To a stirred suspension of CuI (152 mg, 0.8 mmol) in dry  $\text{Et}_2\text{O}$  (2 mL) was added MeLi (1.6 M in  $\text{Et}_2\text{O}$ , 0.88 mL, 1.4 mmol) dropwise at 0 °C. After stirring at this temperature for 10 min, TMSI (112 mg, 0.8 mmol) and **3u** (31.3 mg, 0.1 mmol) was added dropwise at  $-78$  °C. The reaction

mixture was stirred at this temperature for 90 min. After the reaction was completed,  $\text{NH}_3 \cdot \text{H}_2\text{O}$  (25%, w/w, 2 mL) was slowly added. Then the mixture was warmed to rt and extracted with ethyl acetate ( $3 \times 10$  mL). The organic phase was washed with brine (10 mL) and dried over sodium sulfate. After filtration, the solvent was removed and the residue was purified by flash chromatography (petroleum ether: ethyl acetate = 8:1). Product **3v** was obtained as a colorless oil (18 mg, 56% yield, 97% *ee*). The enantiomeric excess was determined by CHIRALPAK AD-H (0.46 cm  $\times$  25 cm), hexanes/ ethanol = 90/10, 1.0 mL/min,  $\lambda = 210$  nm,  $t$  (minor) = 9.37 min,  $t$  (major) = 10.98 min.  $[\alpha]^{25}_{\text{D}} = -16.0$  ( $c=0.10$ , in  $\text{CH}_2\text{Cl}_2$ ).  $^1\text{H}$  NMR (400 MHz,  $\text{CDCl}_3$ )  $\delta$  7.43 – 7.26 (m, 5H), 5.75 (s, 1H), 5.49 (dd,  $J = 36.4, 9.5$  Hz, 1H), 5.06 (dt,  $J = 19.9, 15.7$  Hz, 2H), 4.36 (d,  $J = 24.8$  Hz, 1H), 3.68 (s, 1H), 3.50 – 3.36 (m, 2H), 3.31 (s, 2H), 3.04 (d,  $J = 49.7$  Hz, 1H), 2.31 – 2.01 (m, 2H), 1.94 (s, 1H), 1.71 (d,  $J = 11.0$  Hz, 1H), 1.12 (d,  $J = 7.2$  Hz, 3H).  $^{13}\text{C}$  NMR (101 MHz,  $\text{CDCl}_3$ )  $\delta$  174.4, 174.1, 155.1, 154.9, 133.0, 132.5, 128.5, 128.3, 128.0, 127.9, 127.8, 121.1, 120.9, 67.1, 66.6, 55.1, 53.9, 52.4, 51.9, 46.7, 45.3, 45.0, 44.7, 43.5, 42.6, 31.3, 31.0, 29.7, 29.6, 28.7, 22.4. HRMS (ESI): exact mass calculated for:  $\text{C}_{19}\text{H}_{23}\text{O}_4\text{NNa}$   $[\text{M}+\text{Na}]^+$ : 352.1519, found: 352.1522.

## 6. Asymmetric Formal Total Synthesis of (+)-Minovincine

### 1-benzyl 7-methyl (3*aR*,4*R*,7*S*,7*aS*)-8-oxohexahydro-1*H*-4,7-(epoxymethano)indole-1,7(4*H*)-dicarboxylate

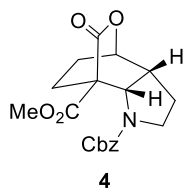

**3a** (857 mg, 2.4 mmol) and  $[\text{Ir}(\text{cod})(\text{PCy}_3)(\text{Py})]\text{PF}_6$  (Crabtree's catalyst, 96.2 mg, 0.12 mmol) were dissolved in THF (20 mL), then the mixture was stirred at rt for 4 h under  $\text{H}_2$  atmosphere. The solvent was removed under reduced pressure and the residue was purified by flash chromatography directly on silica gel (petroleum ether: ethyl acetate = 3:1) to obtain product **4** as a white solid (790 mg, 92% yield, 97% *ee*). The enantiomeric excess was determined by CHIRALPAK IA-H (0.46 cm  $\times$  25 cm), hexanes/ ethanol = 80/20, 1.0 mL/min,  $\lambda = 210$  nm,  $t$  (minor) = 16.37 min,  $t$  (major) = 25.58 min.  $[\alpha]^{25}_{\text{D}} = -74.8$

( $c=0.5$ , in  $\text{CH}_2\text{Cl}_2$ ).  $^1\text{H}$  NMR (400 MHz,  $\text{CDCl}_3$ )  $\delta$  7.38 – 7.28 (m, 5H), 5.24 – 4.95 (m, 2H), 4.80 (dd,  $J = 9.3, 1.6$  Hz, 1H), 4.56 – 4.52 (m, 1H), 4.00 – 3.90 (m, 1H), 3.76 (s, 3H), 3.48 – 3.40 (m, 1H), 3.06 – 2.98 (m, 1H), 2.30 – 2.22 (m, 1H), 2.20 – 2.10 (m, 1H), 2.09 – 1.96 (m, 2H), 1.85 – 1.78 (m, 1H), 1.69 – 1.63 (m, 1H).  $^{13}\text{C}$  NMR (100 MHz,  $\text{CDCl}_3$ )  $\delta$  170.9, 169.4, 154.8, 136.3, 128.6, 128.3, 128.0, 77.4, 67.5, 58.9, 53.3, 52.7, 47.7, 42.2, 25.0, 21.2, 19.6. HRMS (ESI): exact mass calculated for:  $\text{C}_{19}\text{H}_{21}\text{O}_6\text{NNa}$   $[\text{M}+\text{Na}]^+$ : 382.1267, found: 382.1261.

**1-benzyl 7-methyl (3*aR*,4*R*,7*R*,7*aS*)-4-hydroxyoctahydro-1*H*-indole-1,7-dicarboxylate**

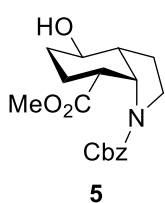

A solution of KOH (985.6 mg, 17.6 mmol) in MeOH (10 mL) was added dropwise into **4** (790 mg, 2.2 mmol) in THF (10 mL) at rt. The mixture was stirred at 40 °C for 24 h. After that, the pH was adjusted to 4 by  $\text{KHSO}_4$  solution (1 M) at 0 °C, then the mixture was extracted by ethyl acetate ( $3 \times 30$  mL). The combined organic layers were dried with  $\text{Na}_2\text{SO}_4$  and concentrated. The obtained intermediate then was dissolved in a mixture solvent of  $\text{Et}_2\text{O}$  and MeOH (4:1, a total of 20 mL). Next, trimethylsilyldiazomethane (2 mol/L in hexane, 2.2 mL, 4.4 mmol) was added to the solution and the mixture was stirred at rt for 2 h. Then the mixture was concentrated and the residue was purified by flash column chromatography (silica gel, petroleum ether: ethyl acetate = 1:1) to afford **5** as a white solid (670 mg, 91% yield over two steps).  $^1\text{H}$  NMR (500 MHz,  $\text{CDCl}_3$ )  $\delta$  7.46 – 7.17 (m, 5H), 5.08 (dd,  $J = 56.6, 46.0$  Hz, 2H), 4.32 (s, 1H), 3.97 (d,  $J = 51.1$  Hz, 1H), 3.67 – 3.21 (m, 5H), 2.46 (d,  $J = 108.1$  Hz, 2H), 2.19 – 1.87 (m, 3H), 1.79 (s, 1H), 1.70 – 1.44 (m, 3H).  $^{13}\text{C}$  NMR (126 MHz,  $\text{CDCl}_3$ )  $\delta$  174.9, 155.1, 137.2, 136.6, 128.5, 128.1, 128.0, 127.9, 67.7, 67.5, 67.2, 66.7, 57.1, 56.4, 52.1, 51.6, 45.8, 45.1, 44.7, 44.4, 28.1, 27.6, 26.6, 25.6, 21.2. HRMS (ESI): exact mass calculated for:  $\text{C}_{18}\text{H}_{23}\text{NO}_5\text{Na}$   $[\text{M}+\text{Na}]^+$ : 356.1468, found: 356.1468.

**1-benzyl 7-methyl (3*aR*,4*R*,7*R*,7*aS*)-4-((*tert*-butyldimethylsilyl)oxy)octahydro-1*H*-indole-1,7-dicarboxylate**

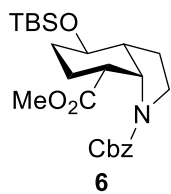

To a solution of **5** (670 mg, 2 mmol) and imidazole (1.36 g, 20 mmol) in dry DCM were added tert-butyldimethylsilyl chloride (3.01 g, 20 mmol) slowly at 0 °C. Then the reaction mixture was warmed to rt and stirred for 2 h until the reaction was complete (monitored by TLC). The

reaction mixture was diluted with DCM and washed with saturated NaHCO<sub>3</sub> solution. Then the mixture was concentrated under reduced pressure and purified by flash column chromatography (silica gel, petroleum ether: ethyl acetate 10:1) to afford **6** as a colorless oil (0.90 g, 99% yield). <sup>1</sup>H NMR (400 MHz, CDCl<sub>3</sub>) δ 7.41 – 7.21 (m, 5H), 5.25 – 4.90 (m, 2H), 4.26 (dd, J = 9.5, 6.7 Hz, 1H), 3.92 (d, J = 17.2 Hz, 1H), 3.64 – 3.25 (m, 5H), 2.48 – 2.14 (m, 2H), 2.05 (d, J = 9.9 Hz, 1H), 1.86 (s, 1H), 1.73 (dd, J = 19.9, 10.0 Hz, 1H), 1.58 – 1.42 (m, 3H), 0.87 (s, 9H), 0.02 (s, 6H). <sup>13</sup>C NMR (101 MHz, CDCl<sub>3</sub>) δ 175.0, 174.7, 155.1, 154.9, 137.2, 136.8, 128.4, 127.9, 67.9, 66.9, 66.5, 57.1, 56.6, 52.0, 51.4, 46.7, 45.8, 45.0, 44.6, 28.2, 27.8, 26.3, 25.8, 25.3, 21.3, 21.0, 18.1, -4.7, -4.9. HRMS (ESI): exact mass calculated for: C<sub>24</sub>H<sub>37</sub>NO<sub>5</sub>SiNa [M+Na]<sup>+</sup>: 470.2333, found: 470.2332.

**Methyl (3aR,4R,7R,7aS)-4-((tert-butyldimethylsilyl)oxy)octahydro-1H-indole-7-carboxylate**

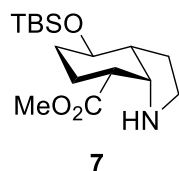

A mixture of **6** (0.90 g, 2 mmol) and Pd/C (40% wt, 0.36 g) in EtOH (20 mL) was stirred under H<sub>2</sub> atmosphere (1 atm) at rt for 2 h, and then filtered through a short pad of celite. The mixture was concentrated

under reduced pressure and purified by flash column chromatography (silica gel, DCM: MeOH = 15:1) to afford **7** as a colorless oil (0.55 g, 87% yield). <sup>1</sup>H NMR (400 MHz, CDCl<sub>3</sub>) δ 3.94 (d, J = 3.3 Hz, 1H), 3.73 (s, 3H), 3.69 – 3.60 (m, 1H), 3.27 (s, 1H), 3.18 – 3.01 (m, 2H), 2.40 (dd, J = 13.3, 6.0 Hz, 1H), 2.30 – 2.16 (m, 1H), 1.99 – 1.84 (m, 2H), 1.80 – 1.70 (m, 1H), 1.59 (ddt, J = 13.9, 9.3, 7.6 Hz, 3H), 0.90 (s, 9H), 0.06 (d, J = 5.0 Hz, 6H). <sup>13</sup>C NMR (101 MHz, CDCl<sub>3</sub>) δ 175.4, 68.7, 57.3, 51.9, 46.6, 43.7, 43.2, 28.9, 27.1, 25.8, 21.7, 18.1, -4.6, -4.9. HRMS (ESI): exact mass calculated for: C<sub>16</sub>H<sub>31</sub>NO<sub>3</sub>SiNa [M+Na]<sup>+</sup>: 336.1965, found: 336.1963.

**methyl (3a*R*,4*R*,7*R*,7a*S*)-4-((tert-butyldimethylsilyl)oxy)-1-(3-iodopropyl)octahydro-1*H*-indole-7-carboxylate**

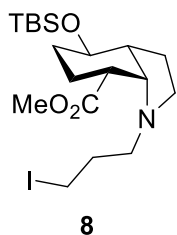

To a solution of **7** (0.55 g, 1.75 mmol) in DMF (5 mL) was added NaHCO<sub>3</sub> (1.47 g, 17.5 mmol) followed by 1,3-diiodopropane (5.18 g, 17.5 mmol). The reaction mixture was heated to 35 °C for 3 h until the reaction was complete. The mixture was diluted with water and extracted with ethyl acetate (3 × 30 mL). The organic layer was washed with saturated NaCl solution (3 × 30 mL), dried over Na<sub>2</sub>SO<sub>4</sub> and concentrated under reduced pressure. The residue was purified by flash column chromatography (silica gel, petroleum ether: ethyl acetate = 10: 1) to afford **8** as a colorless oil (0.44 g, 52% yield). <sup>1</sup>H NMR (400 MHz, CDCl<sub>3</sub>) δ 3.76 – 3.56 (m, 4H), 3.21 (td, J = 6.3, 3.8 Hz, 2H), 3.15 – 3.00 (m, 2H), 2.75 (dd, J = 7.1, 4.6 Hz, 1H), 2.57 (d, J = 5.2 Hz, 1H), 2.36 – 2.21 (m, 2H), 2.12 – 2.01 (m, 1H), 1.96 – 1.83 (m, 3H), 1.82 – 1.74 (m, 1H), 1.74 – 1.58 (m, 3H), 1.47 – 1.33 (m, 1H), 0.86 (s, 9H), 0.02 (d, J = 5.0 Hz, 6H). <sup>13</sup>C NMR (101 MHz, CDCl<sub>3</sub>) δ 175.5, 70.7, 64.2, 55.0, 51.8, 51.6, 45.3, 42.3, 32.3, 30.5, 26.6, 25.9, 22.3, 18.1, 5.2, -4.1, -4.6. HRMS (ESI): exact mass calculated for: C<sub>19</sub>H<sub>37</sub>INO<sub>3</sub>Si [M+H]<sup>+</sup>: 482.1582, found: 482.1583.

**(3<sup>1</sup>*S*,6a*S*,9*R*,9a*R*)-9-((tert-butyldimethylsilyl)oxy)octahydro-4*H*-pyrrolo[3,2,1-*ij*]quinoline-6a(3<sup>1</sup>*H*)-carboxylate**

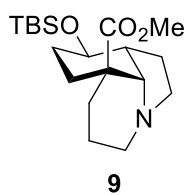

To a solution of **8** (0.44 g, 0.91 mmol) in THF (5 mL) was added LDA (1.82 mL, 1.82 mmol) slowly at -78 °C under N<sub>2</sub> atmosphere. Then the reaction mixture was stirred at -78 °C for 2 h and then heated to 0 °C for another 2 h. The reaction was quenched with saturated NH<sub>4</sub>Cl solution, extracted with ethyl acetate and concentrated under reduced pressure. The residue was purified by flash column chromatography (silica gel, petroleum ether: ethyl acetate = 10: 1) to afford **9** as a colorless oil (0.28 g, 87% yield). <sup>1</sup>H NMR (400 MHz, CDCl<sub>3</sub>) δ 3.67 (s, 3H), 3.48 (ddd, J = 11.4, 9.1, 4.4 Hz, 1H), 3.08 (d, J = 3.4 Hz, 1H), 2.96 (d, J = 10.7 Hz, 1H), 2.36 (d, J = 4.6 Hz, 1H), 2.13 – 1.89 (m, 3H), 1.83 – 1.70 (m, 5H), 1.70 – 1.61 (m, 2H), 1.55 – 1.44 (m, 1H), 1.44 – 1.33 (m, 1H), 1.22 – 1.11 (m,

1H), 0.83 (s, 9H), 0.01 (d, J = 7.4 Hz, 6H). <sup>13</sup>C NMR (101 MHz, CDCl<sub>3</sub>) δ 177.1, 73.9, 66.7, 53.0, 52.9, 51.9, 46.0, 44.9, 33.1, 33.1, 26.2, 25.9, 25.7, 21.8, 18.0, -3.8, -4.4. HRMS (ESI): exact mass calculated for: C<sub>19</sub>H<sub>36</sub>NO<sub>3</sub>Si [M+H]<sup>+</sup>: 354.2459, found: 354.2458.

**methyl (3<sup>1</sup>S,6a<sup>S</sup>,9a<sup>R</sup>)-9-oxooctahydro-4H-pyrrolo[3,2,1-ij]quinoline-6a(3<sup>1</sup>H)-carboxylate**

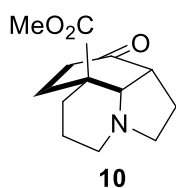

To a solution of **9** (0.28 g, 0.79 mmol) in THF (5 mL) was added HCl solution (1 M, 4 mL, 4 mmol). The reaction mixture was stirred at rt for 4 h until the reaction was complete. The pH of the mixture was adjusted to 8 by saturated NaHCO<sub>3</sub> solution, then the mixture was extracted with ethyl acetate, dried over Na<sub>2</sub>SO<sub>4</sub> and concentrated under reduced pressure to obtain a white solid. Next, the white solid and Et<sub>3</sub>N (0.48 g, 4.8 mmol) were dissolved in a mixed solvent of DCM and DMSO (1:2, a total of 6 mL). then a solution of PySO<sub>3</sub> (4.0 mmol) in DMSO (2 mL) was added to the mixture at rt. The reaction was stirred at rt overnight, then quenched with saturated NaHCO<sub>3</sub> solution. The mixture was extracted with ethyl acetate, dried over Na<sub>2</sub>SO<sub>4</sub> and concentrated under reduced pressure. The residue was purified by flash column chromatography (silica gel, petroleum ether: ethyl acetate = 5: 1) to afford **10** as a yellow oil (0.13 g, 70% yield over two steps). [α]<sup>25</sup><sub>D</sub> = -27.8 (c = 1.0, in CHCl<sub>3</sub>). <sup>1</sup>H NMR (400 MHz, CDCl<sub>3</sub>) δ 3.78 (s, 3H), 3.07 – 2.97 (m, 2H), 2.92 – 2.84 (m, 1H), 2.62 (d, J = 5.1 Hz, 1H), 2.43 (ddd, J = 30.1, 17.4, 10.4 Hz, 3H), 2.25 (td, J = 14.7, 5.3 Hz, 1H), 2.08 – 1.97 (m, 2H), 1.96 – 1.85 (m, 2H), 1.82 – 1.65 (m, 2H), 1.63 – 1.51 (m, 2H). <sup>13</sup>C NMR (101 MHz, CDCl<sub>3</sub>) δ 210.2, 176.4, 67.9, 52.6, 52.5, 52.2, 49.3, 45.8, 38.5, 32.5, 27.2, 21.2, 21.1. HRMS (ESI): exact mass calculated for: C<sub>13</sub>H<sub>20</sub>NO<sub>3</sub> [M+H]<sup>+</sup>: 238.1438, found: 238.1438.

## 7. X-ray Crystallographic Data of 3a

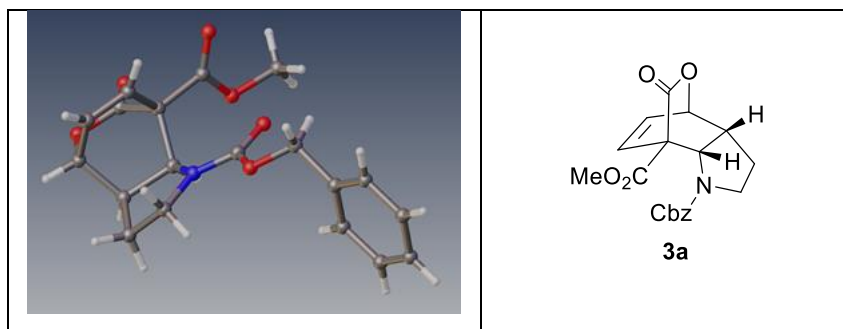

**Table S8. Crystal Data and Structure Refinement for 3a.**

| Information                     | <b>3a</b>                                                       |
|---------------------------------|-----------------------------------------------------------------|
| Identification code             | mjr18224_0m                                                     |
| Empirical formula               | C <sub>25</sub> H <sub>19</sub> BrN <sub>4</sub> O <sub>2</sub> |
| Formula weight                  | 487.35                                                          |
| Temperature                     | 173(2) K                                                        |
| Wavelength                      | 1.34139 Å                                                       |
| Crystal system                  | Orthorhombic                                                    |
| Space group                     | P 21 21 21                                                      |
| Unit cell dimensions            | a = 6.6491(4) Å<br>b = 13.5692(7) Å<br>c = 23.9241(13) Å        |
| Volume                          | 2158.5(2) Å <sup>3</sup>                                        |
| Z                               | 4                                                               |
| Density (calculated)            | 1.500 Mg/m <sup>3</sup>                                         |
| Absorption coefficient          | 1.873 mm <sup>-1</sup>                                          |
| F(000)                          | 992                                                             |
| Crystal size                    | 0.170 x 0.140 x 0.100 mm <sup>3</sup>                           |
| Theta range for data collection | 5.673 to 54.994°.                                               |
| Index ranges                    | -7<=h<=8, -16<=k<=14, -27<=l<=29                                |
| Reflections collected           | 13564                                                           |
| Independent reflections         | 3900 [R(int) = 0.0462]                                          |
| Completeness to theta = 53.594° | 94.7 %                                                          |
| Absorption correction           | Semi-empirical from equivalents                                 |
| Max. and min. transmission      | 0.7456 and 0.4677                                               |

|                                   |                                             |
|-----------------------------------|---------------------------------------------|
| Refinement method                 | Full-matrix least-squares on F <sup>2</sup> |
| Data / restraints / parameters    | 3900 / 0 / 290                              |
| Goodness-of-fit on F <sup>2</sup> | 1.045                                       |
| Final R indices [I>2σ(I)]         | R1 = 0.0269, wR2 = 0.0663                   |
| R indices (all data)              | R1 = 0.0274, wR2 = 0.0667                   |
| Absolute structure parameter      | 0.097(7)                                    |
| Extinction coefficient            | 0.0147(16)                                  |
| Largest diff. peak and hole       | 0.278 and -0.473 e.Å <sup>-3</sup>          |
| CCDC number                       | 2158164                                     |

## 8. Reference

1. X.-W. Liang, Y. Zhao, X.-G. Si, M.-M. Xu, J.-H. Tan, Z.-M. Zhang, C.-G. Zheng, C. Zheng and Q. Cai, *Angew. Chem., Int. Ed.*, 2019, **58**, 14562–14567.
2. D. F. Oliveira, P. Miranda and C. R. D. Correia, *J. Org. Chem.*, 1999, **64**, 6646–6652.
3. D. Francis, A. Nelson and S. P. Marsden, *Chemistry*, 2020, **26**, 14861–14865.
4. Y. Xie, J. Hu, P. Xie, B. Qian and H. Huang, *J. Am. Chem. Soc.*, 2013, **135**, 18327–18330.
5. E. M. Boyd and J. Sperry, *Tetrahedron Lett.*, 2012, **53**, 3623–3626.
6. T. Yokoi, Y. Nakagawa and H. Miyagawa, *Pest Manag Sci*, 2019, **75**, 115–124.
7. L.-H. Liao, M.-M. Zhang, Y.-J. Liao, W.-C. Yuan and X.-M. Zhang, *Synlett*, 2015, **26**, 1720–1724.
8. S.-C. Krieg, J. Grimmer, P. Kramer, M. Bolte, H. Kelm and G. Manolikakes, *Angew. Chem., Int. Ed.*, 2021, **60**, 23667–23671.



## 9. Chromatographic Data for Chiral Products

### Compound 3a

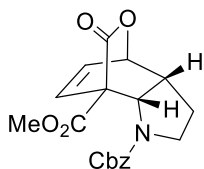

#### HPLC Conditions

Column: Chiralcel AD-H, Daicel Chemical Industries, Ltd.

Eluent: hexanes/ethanol (80:20)

Flow rate: 1.0 mL/min

Detection: UV 210 nm

#### Racemic

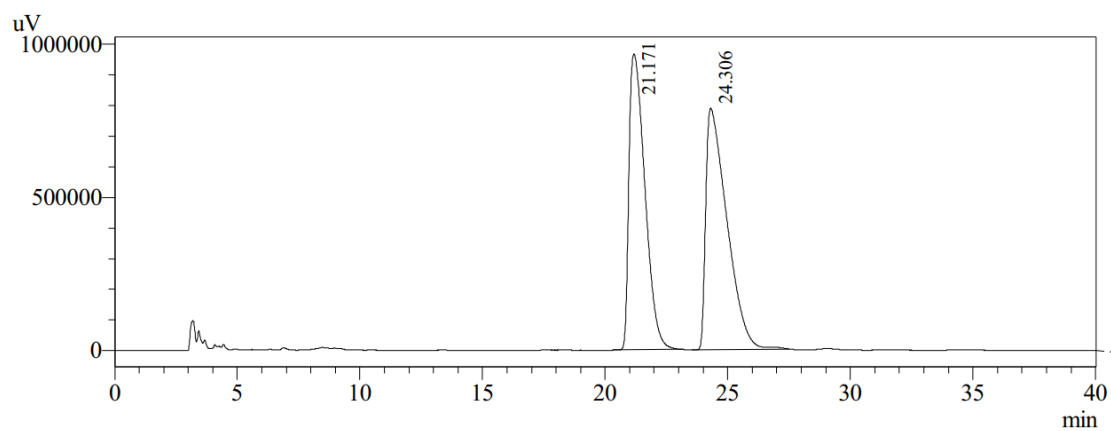

| Peak# | Ret. Time | Area     | Height  | Area %  | Height % |
|-------|-----------|----------|---------|---------|----------|
| 1     | 21.171    | 43905539 | 967122  | 48.185  | 55.093   |
| 2     | 24.306    | 47213950 | 788309  | 51.815  | 44.907   |
| Total |           | 91119488 | 1755431 | 100.000 | 100.000  |

#### Chiral

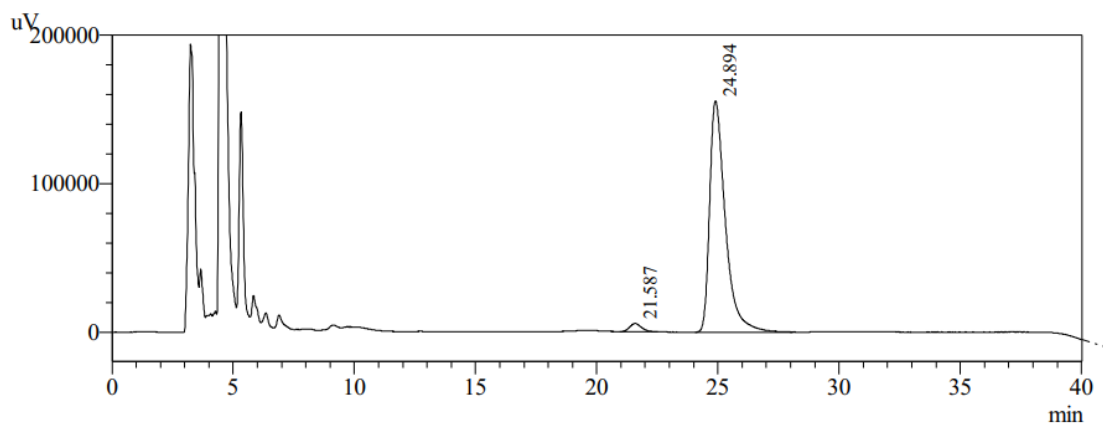

| Peak# | Ret. Time | Area    | Height | Area %  | Height % |
|-------|-----------|---------|--------|---------|----------|
| 1     | 21.587    | 189378  | 5533   | 2.623   | 3.426    |
| 2     | 24.894    | 7031675 | 155974 | 97.377  | 96.574   |
| Total |           | 7221054 | 161507 | 100.000 | 100.000  |

## Compound 3b

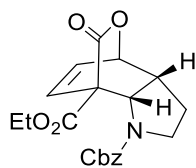

### HPLC Conditions

Column: Chiralcel AD-H, Daicel Chemical Industries, Ltd.

Eluent: hexanes/ethanol (80:20)

Flow rate: 1.0 mL/min

Detection: UV 210 nm

### Racemic

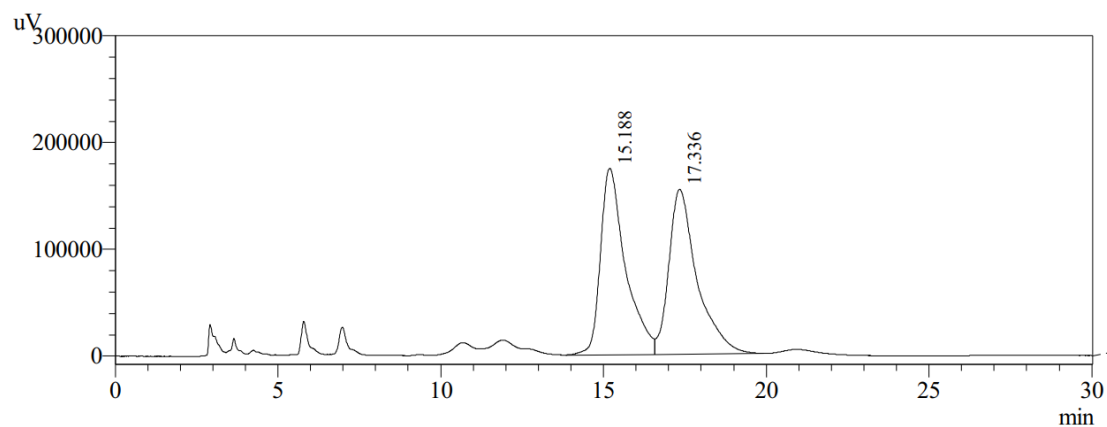

| Peak# | Ret. Time | Area     | Height | Area %  | Height % |
|-------|-----------|----------|--------|---------|----------|
| 1     | 15.188    | 9345107  | 174644 | 50.153  | 53.104   |
| 2     | 17.336    | 9288049  | 154231 | 49.847  | 46.896   |
| Total |           | 18633156 | 328875 | 100.000 | 100.000  |

### Chiral

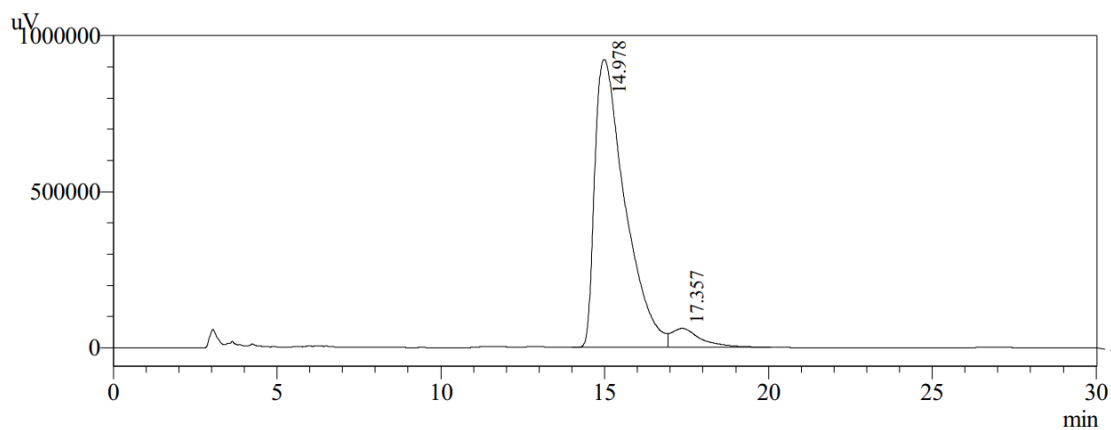

| Peak# | Ret. Time | Area     | Height | Area %  | Height % |
|-------|-----------|----------|--------|---------|----------|
| 1     | 14.978    | 59374578 | 922980 | 93.922  | 93.824   |
| 2     | 17.357    | 3842659  | 60760  | 6.078   | 6.176    |
| Total |           | 63217238 | 983740 | 100.000 | 100.000  |

## Compound 3c

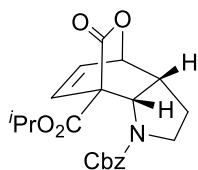

### HPLC Conditions

Column: Chiralcel OJ-H, Daicel Chemical Industries, Ltd.

Eluent: hexanes/ethanol (80:20)

Flow rate: 1.0 mL/min

Detection: UV 210 nm

### Racemic

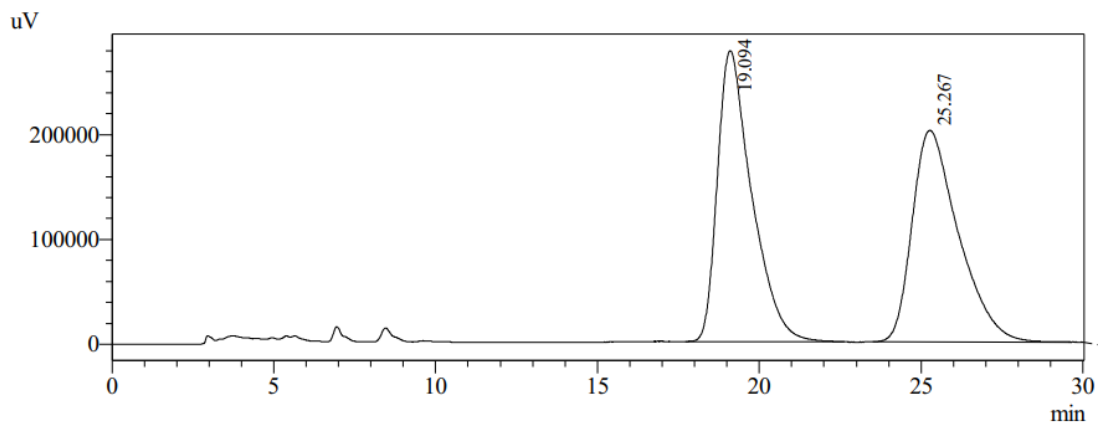

| Peak# | Ret. Time | Area     | Height | Area %  | Height % |
|-------|-----------|----------|--------|---------|----------|
| 1     | 19.094    | 20497645 | 277275 | 50.582  | 57.898   |
| 2     | 25.267    | 20025690 | 201631 | 49.418  | 42.102   |
| Total |           | 40523335 | 478906 | 100.000 | 100.000  |

### Chiral

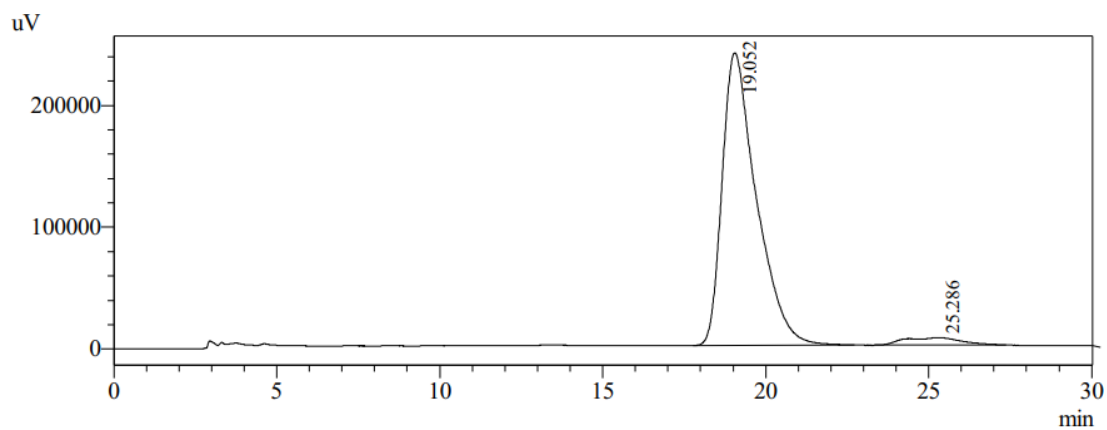

| Peak# | Ret. Time | Area     | Height | Area %  | Height % |
|-------|-----------|----------|--------|---------|----------|
| 1     | 19.052    | 17585864 | 240463 | 95.899  | 97.493   |
| 2     | 25.286    | 752074   | 6182   | 4.101   | 2.507    |
| Total |           | 18337939 | 246646 | 100.000 | 100.000  |

## Compound 3d

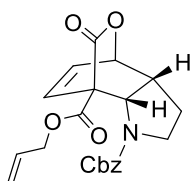

### HPLC Conditions

Column: Chiralcel AD-H, Daicel Chemical Industries, Ltd.

Eluent: hexanes/ethanol (80:20)

Flow rate: 1.0 mL/min

Detection: UV 210 nm

### Racemic

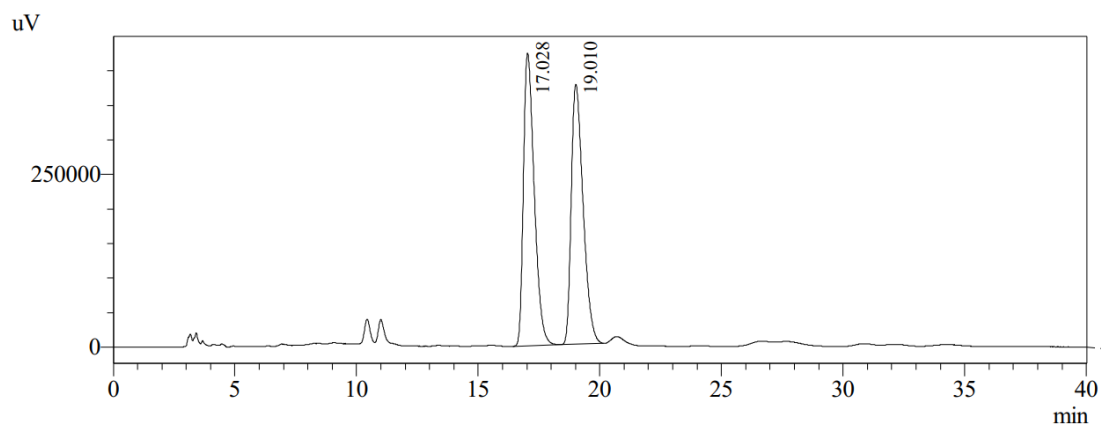

| Peak# | Ret. Time | Area     | Height | Area %  | Height % |
|-------|-----------|----------|--------|---------|----------|
| 1     | 17.028    | 13130151 | 423857 | 50.669  | 52.961   |
| 2     | 19.010    | 12783329 | 376465 | 49.331  | 47.039   |
| Total |           | 25913480 | 800322 | 100.000 | 100.000  |

### Chiral

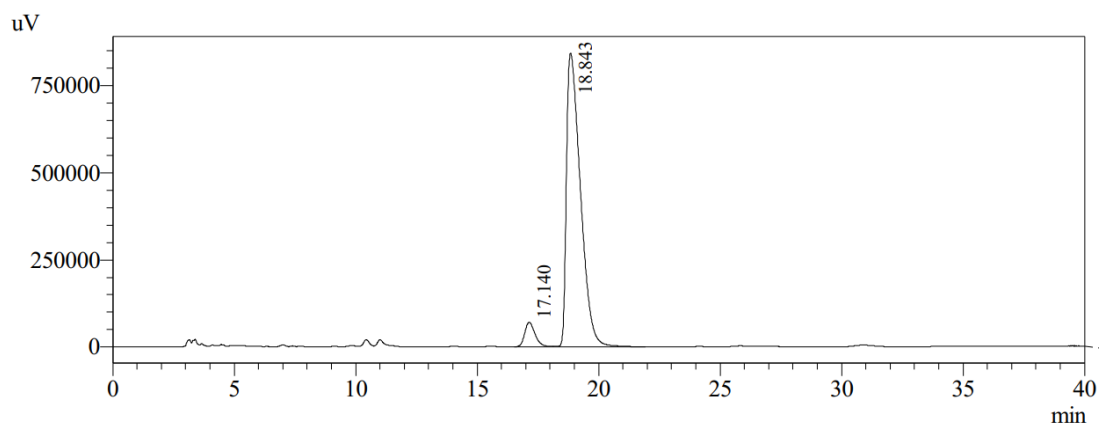

| Peak# | Ret. Time | Area     | Height | Area %  | Height % |
|-------|-----------|----------|--------|---------|----------|
| 1     | 17.140    | 2079915  | 70092  | 5.796   | 7.675    |
| 2     | 18.843    | 33802914 | 843124 | 94.204  | 92.325   |
| Total |           | 35882828 | 913217 | 100.000 | 100.000  |

## Compound 3e

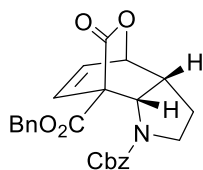

### HPLC Conditions

Column: Chiralcel AD-H, Daicel Chemical Industries, Ltd.

Eluent: hexanes/ethanol (80:20)

Flow rate: 1.0 mL/min

Detection: UV 210 nm

### Racemic

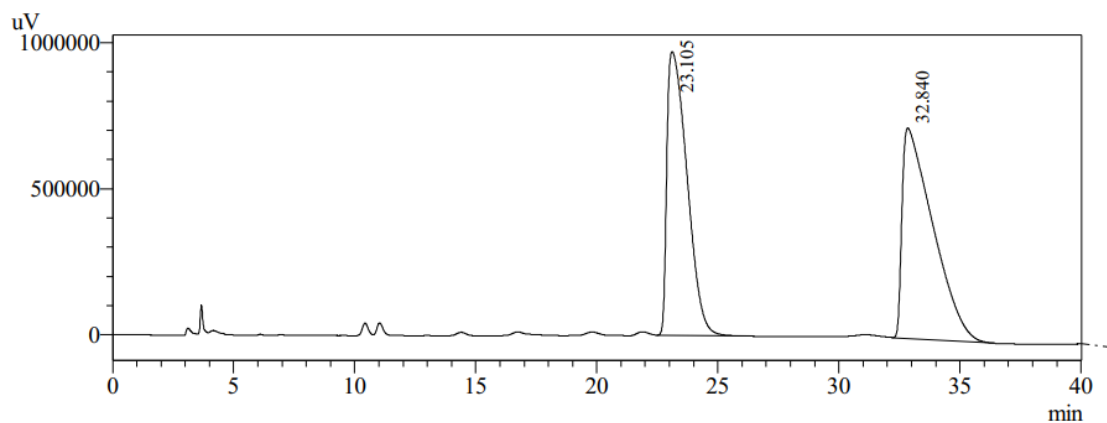

| Peak# | Ret. Time | Area      | Height  | Area %  | Height % |
|-------|-----------|-----------|---------|---------|----------|
| 1     | 23.105    | 56222157  | 971982  | 46.872  | 57.411   |
| 2     | 32.840    | 63725302  | 721031  | 53.128  | 42.589   |
| Total |           | 119947459 | 1693013 | 100.000 | 100.000  |

### Chiral

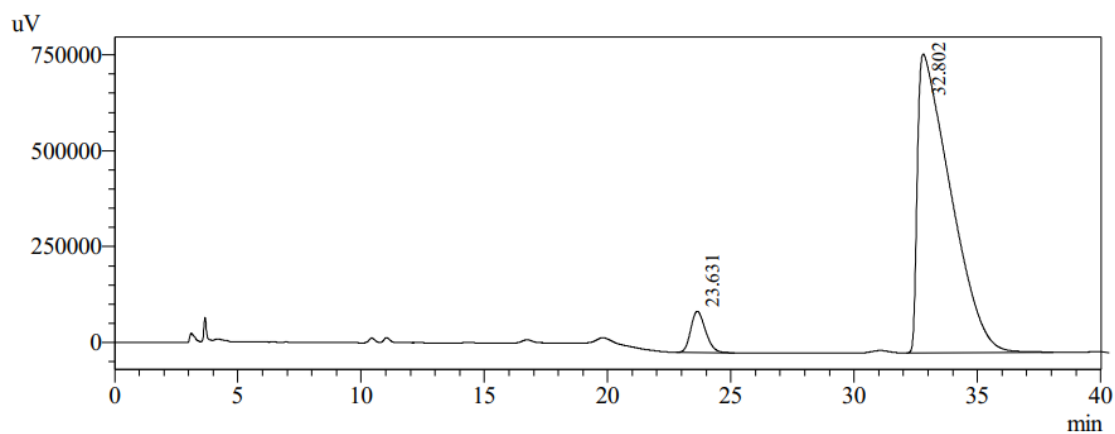

| Peak# | Ret. Time | Area     | Height | Area %  | Height % |
|-------|-----------|----------|--------|---------|----------|
| 1     | 23.631    | 4464223  | 107426 | 5.782   | 12.109   |
| 2     | 32.802    | 72738116 | 779763 | 94.218  | 87.891   |
| Total |           | 77202339 | 887188 | 100.000 | 100.000  |

## Compound 3f

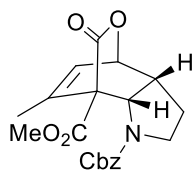

### HPLC Conditions

Column: Chiralcel AD-H, Daicel Chemical Industries, Ltd.

Eluent: hexanes/ethanol (80:20)

Flow rate: 1.0 mL/min

Detection: UV 210 nm

### Racemic

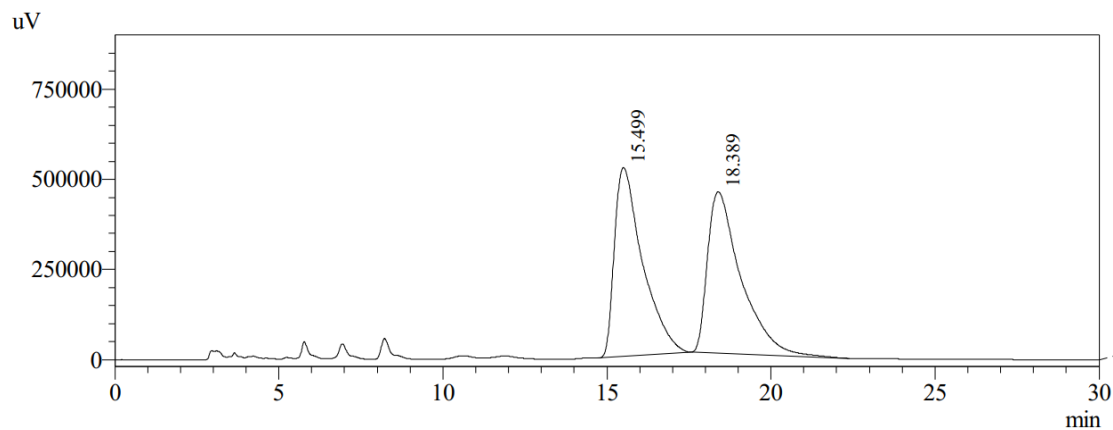

| Peak# | Ret. Time | Area     | Height | Area %  | Height % |
|-------|-----------|----------|--------|---------|----------|
| 1     | 15.499    | 31273527 | 523477 | 49.577  | 53.903   |
| 2     | 18.389    | 31807636 | 447664 | 50.423  | 46.097   |
| Total |           | 63081163 | 971141 | 100.000 | 100.000  |

### Chiral

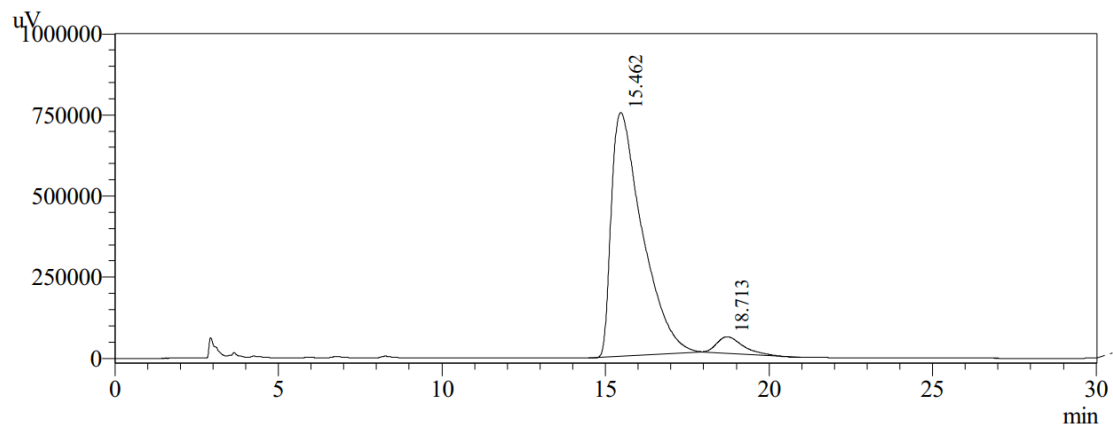

| Peak# | Ret. Time | Area     | Height | Area %  | Height % |
|-------|-----------|----------|--------|---------|----------|
| 1     | 15.462    | 49628398 | 751080 | 94.624  | 93.681   |
| 2     | 18.713    | 2819853  | 50663  | 5.376   | 6.319    |
| Total |           | 52448251 | 801743 | 100.000 | 100.000  |

## Compound 3g

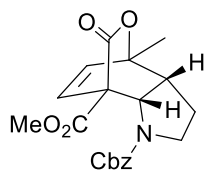

### HPLC Conditions

Column: Chiralcel AD-H, Daicel Chemical Industries, Ltd.

Eluent: hexanes/ethanol (80:20)

Flow rate: 1.0 mL/min

Detection: UV 210 nm

### Racemic

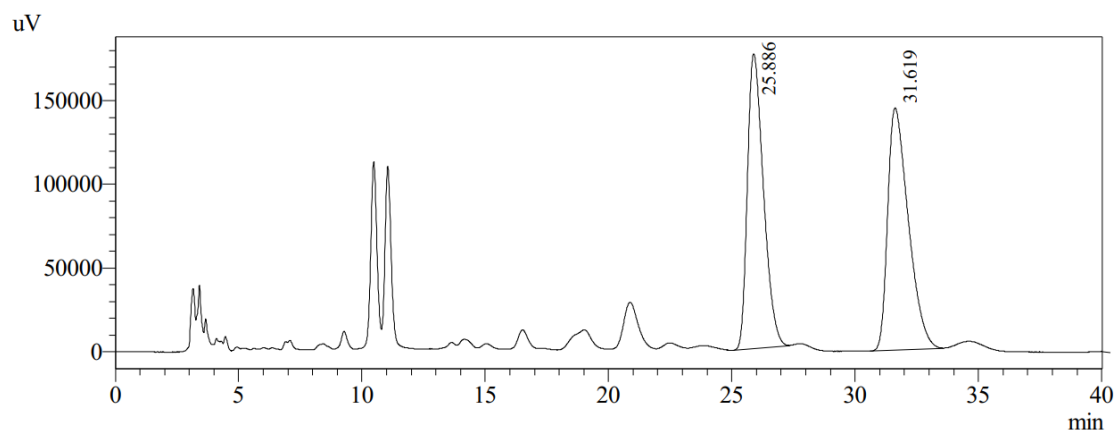

| Peak# | Ret. Time | Area     | Height | Area %  | Height % |
|-------|-----------|----------|--------|---------|----------|
| 1     | 25.886    | 7968330  | 176039 | 48.570  | 54.898   |
| 2     | 31.619    | 8437395  | 144625 | 51.430  | 45.102   |
| Total |           | 16405725 | 320664 | 100.000 | 100.000  |

### Chiral

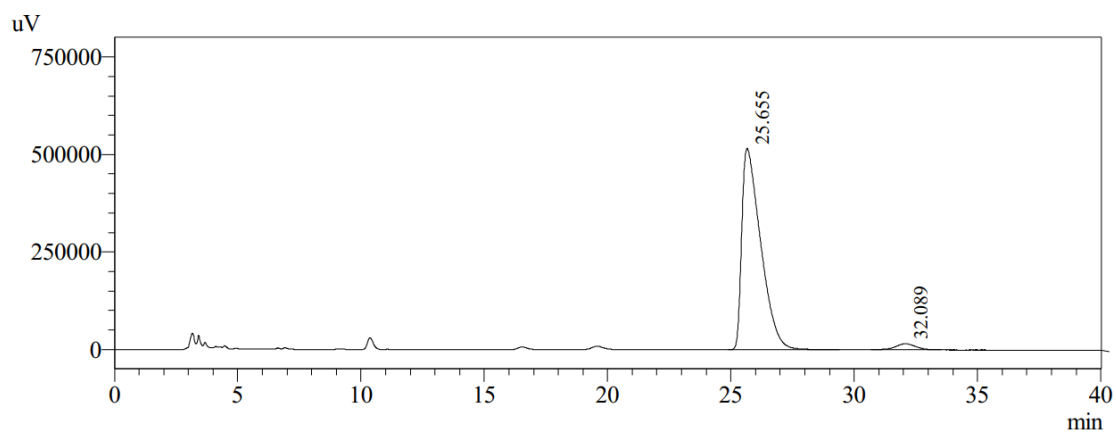

| Peak# | Ret. Time | Area     | Height | Area %  | Height % |
|-------|-----------|----------|--------|---------|----------|
| 1     | 25.655    | 27643708 | 516246 | 96.876  | 97.077   |
| 2     | 32.089    | 891336   | 15544  | 3.124   | 2.923    |
| Total |           | 28535044 | 531790 | 100.000 | 100.000  |

## Compound 3i

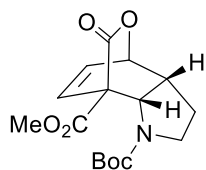

### HPLC Conditions

Column: Chiralcel OD-H, Daicel Chemical Industries, Ltd.

Eluent: hexanes/ethanol (80:20)

Flow rate: 1.0 mL/min

Detection: UV 210 nm

### Racemic

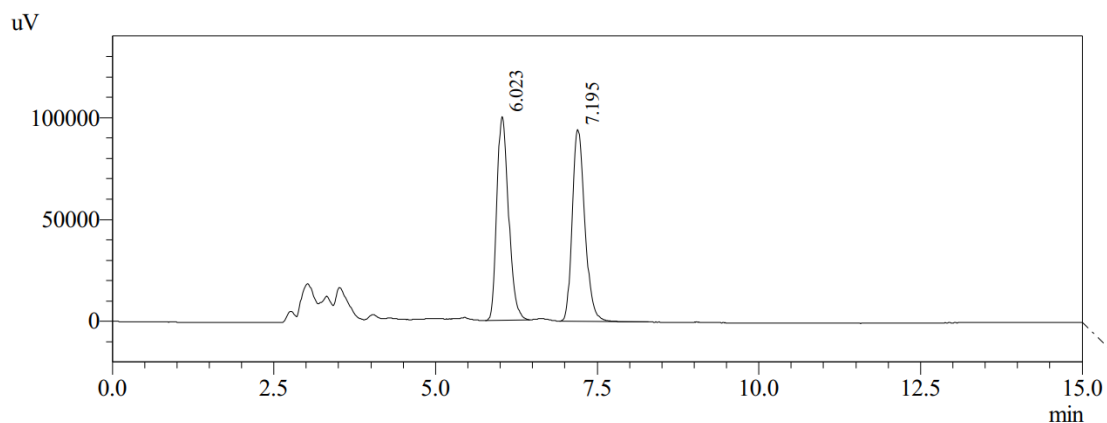

| Peak# | Ret. Time | Area    | Height | Area %  | Height % |
|-------|-----------|---------|--------|---------|----------|
| 1     | 6.023     | 1269405 | 99893  | 49.756  | 51.473   |
| 2     | 7.195     | 1281857 | 94174  | 50.244  | 48.527   |
| Total |           | 2551262 | 194068 | 100.000 | 100.000  |

### Chiral

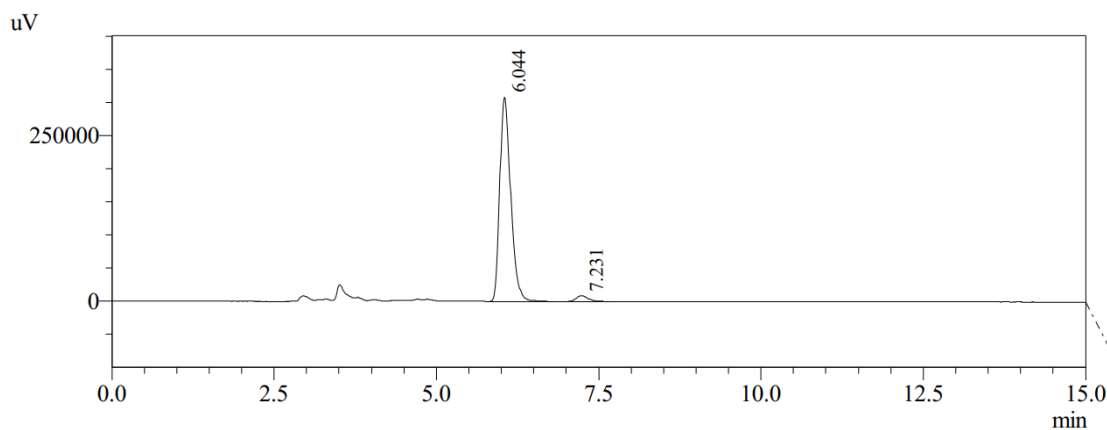

| Peak# | Ret. Time | Area    | Height | Area %  | Height % |
|-------|-----------|---------|--------|---------|----------|
| 1     | 6.044     | 3625454 | 308196 | 96.990  | 97.267   |
| 2     | 7.231     | 112497  | 8659   | 3.010   | 2.733    |
| Total |           | 3737951 | 316855 | 100.000 | 100.000  |



## Compound 3j

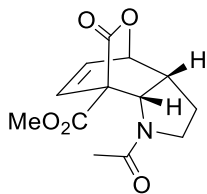

### HPLC Conditions

Column: Chiralcel OD-H, Daicel Chemical Industries, Ltd.

Eluent: hexanes/ethanol (80:20)

Flow rate: 1.0 mL/min

Detection: UV 210 nm

### Racemic

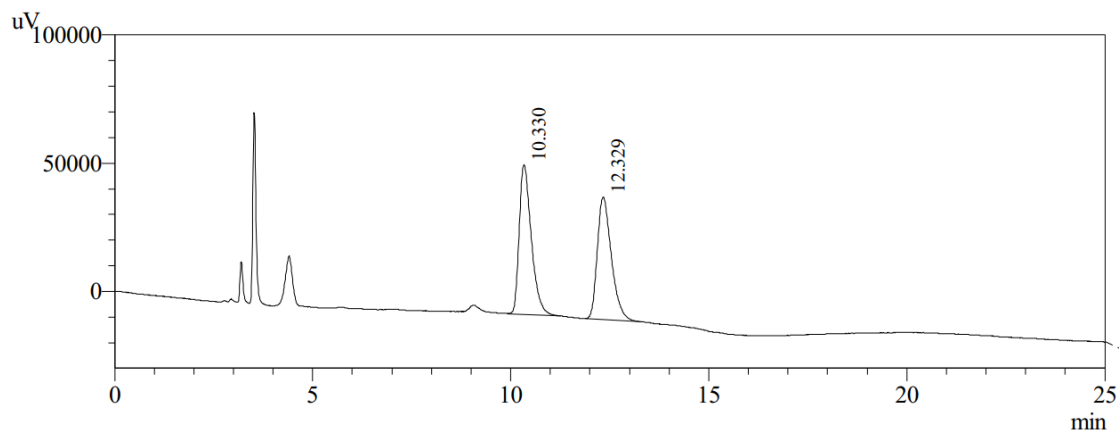

| Peak# | Ret. Time | Area    | Height | Area %  | Height % |
|-------|-----------|---------|--------|---------|----------|
| 1     | 10.330    | 1239124 | 58244  | 51.061  | 54.906   |
| 2     | 12.329    | 1187620 | 47835  | 48.939  | 45.094   |
| Total |           | 2426743 | 106079 | 100.000 | 100.000  |

### Chiral

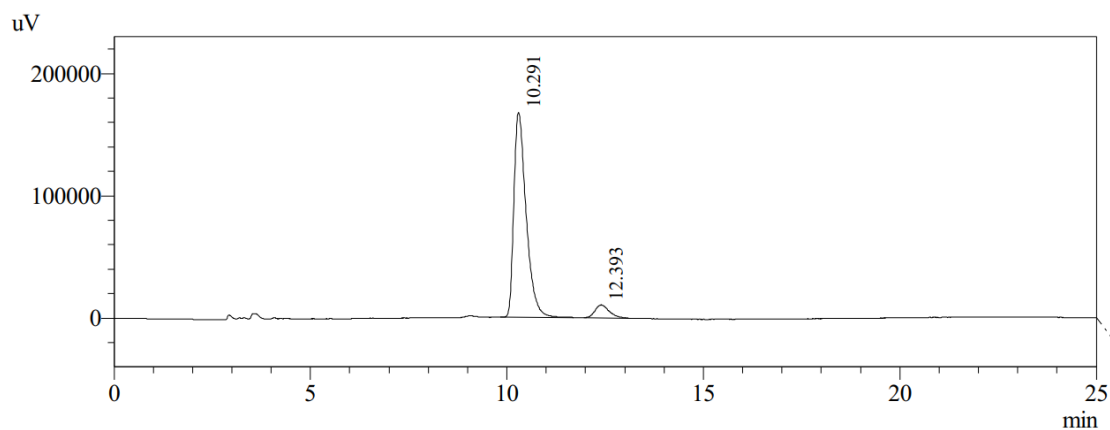

| Peak# | Ret. Time | Area    | Height | Area %  | Height % |
|-------|-----------|---------|--------|---------|----------|
| 1     | 10.291    | 3633763 | 167668 | 93.277  | 94.078   |
| 2     | 12.393    | 261904  | 10553  | 6.723   | 5.922    |
| Total |           | 3895666 | 178221 | 100.000 | 100.000  |

## Compound 3k

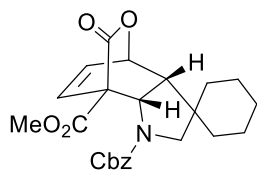

### HPLC Conditions

Column: Chiralcel OD-H, Daicel Chemical Industries, Ltd.

Eluent: hexanes/ethanol (80:20)

Flow rate: 1.0 mL/min

Detection: UV 210 nm

### Racemic

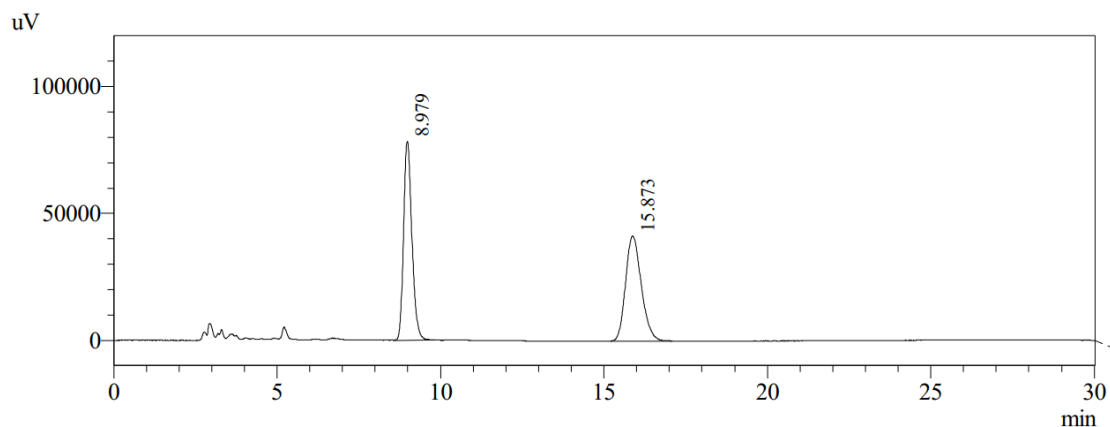

| Peak# | Ret. Time | Area    | Height | Area %  | Height % |
|-------|-----------|---------|--------|---------|----------|
| 1     | 8.979     | 1390548 | 78396  | 50.068  | 65.405   |
| 2     | 15.873    | 1386796 | 41466  | 49.932  | 34.595   |
| Total |           | 2777344 | 119862 | 100.000 | 100.000  |

### Chiral

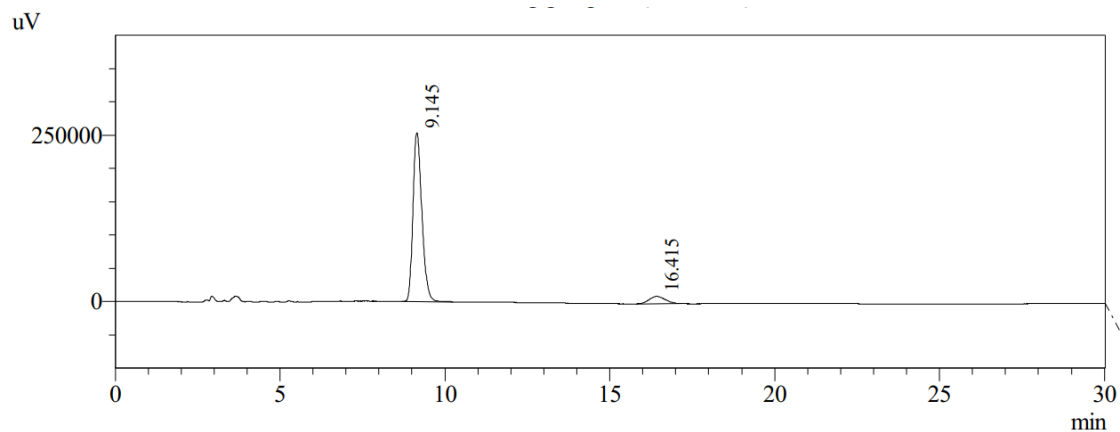

| Peak# | Ret. Time | Area    | Height | Area %  | Height % |
|-------|-----------|---------|--------|---------|----------|
| 1     | 9.145     | 4761460 | 254035 | 92.772  | 95.860   |
| 2     | 16.415    | 370994  | 10970  | 7.228   | 4.140    |
| Total |           | 5132455 | 265005 | 100.000 | 100.000  |

## Compound 3n

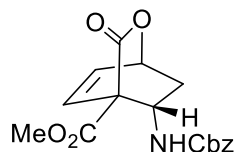

### HPLC Conditions

Column: Chiralcel ID, Daicel Chemical Industries, Ltd.

Eluent: hexanes/ *i*PrOH (70:30)

Flow rate: 1.0 mL/min

Detection: UV 210 nm

### Racemic

mAU

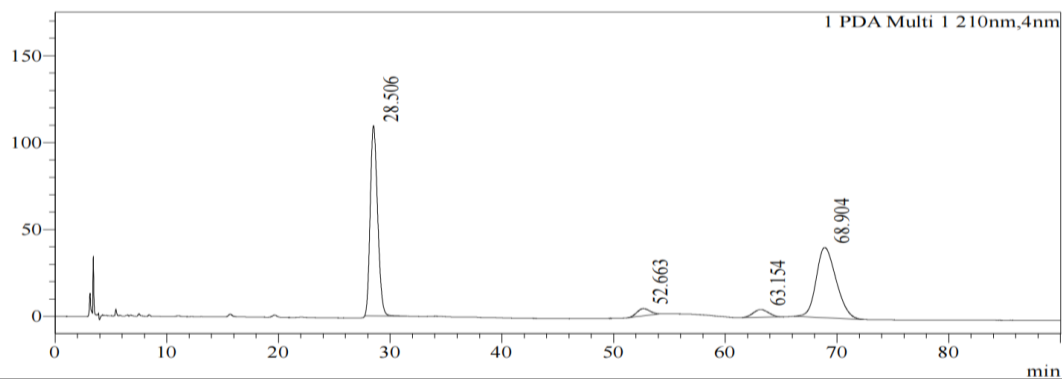

| Peak# | Ret. Time | Area     | Height | Area%   | Height% |
|-------|-----------|----------|--------|---------|---------|
| 1     | 28.506    | 5061418  | 109442 | 46.740  | 69.069  |
| 2     | 52.663    | 336757   | 4202   | 3.110   | 2.652   |
| 3     | 63.154    | 422496   | 4407   | 3.902   | 2.781   |
| 4     | 68.904    | 5008279  | 40401  | 46.249  | 25.497  |
| Total |           | 10828950 | 158453 | 100.000 | 100.000 |

### Chiral

mAU

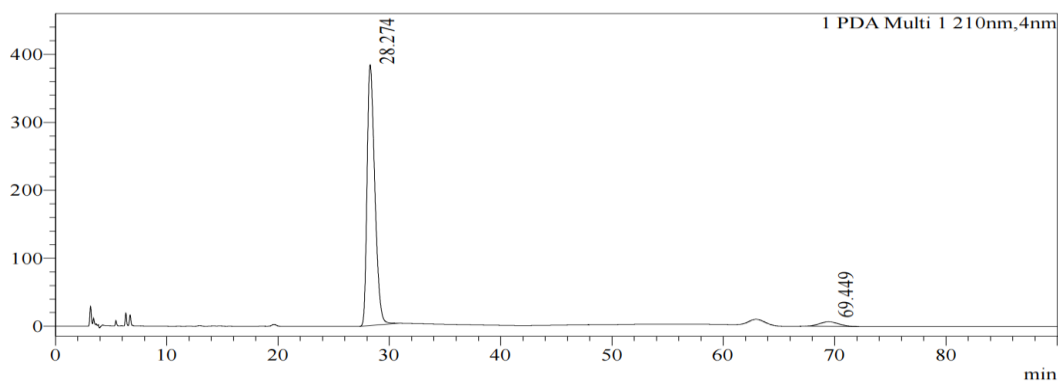

| Peak# | Ret. Time | Area     | Height | Area%   | Height% |
|-------|-----------|----------|--------|---------|---------|
| 1     | 28.274    | 18569446 | 383735 | 95.895  | 98.291  |
| 2     | 69.449    | 794871   | 6670   | 4.105   | 1.709   |
| Total |           | 19364317 | 390405 | 100.000 | 100.000 |

## Compound 3o

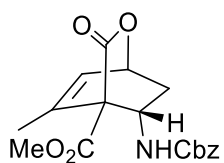

### HPLC Conditions

Column: Chiralcel OD-H, Daicel Chemical Industries, Ltd.

Eluent: hexanes/ethanol (80:20)

Flow rate: 1.0 mL/min

Detection: UV 210 nm

### Racemic

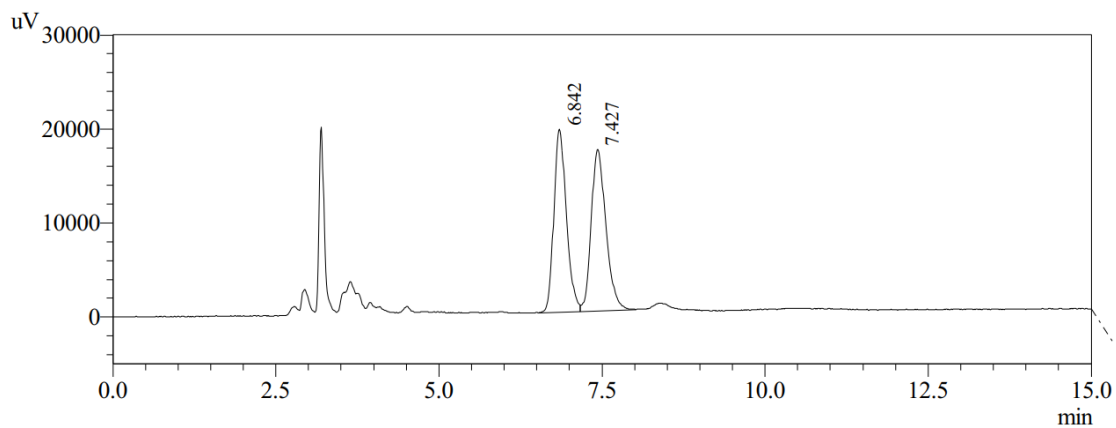

| Peak# | Ret. Time | Area   | Height | Area %  | Height % |
|-------|-----------|--------|--------|---------|----------|
| 1     | 6.842     | 261236 | 19486  | 49.222  | 53.197   |
| 2     | 7.427     | 269490 | 17144  | 50.778  | 46.803   |
| Total |           | 530726 | 36630  | 100.000 | 100.000  |

### Chiral

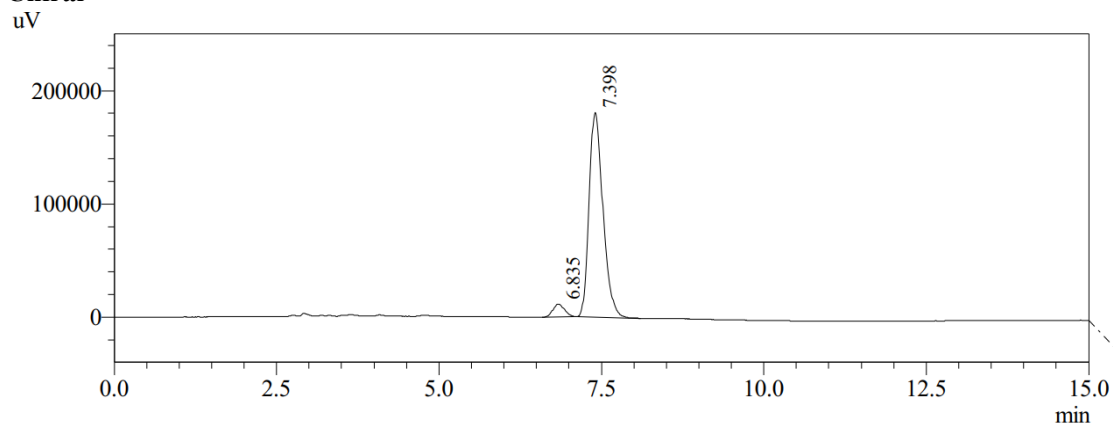

| Peak# | Ret. Time | Area    | Height | Area %  | Height % |
|-------|-----------|---------|--------|---------|----------|
| 1     | 6.835     | 142987  | 11291  | 5.044   | 5.884    |
| 2     | 7.398     | 2691580 | 180583 | 94.956  | 94.116   |
| Total |           | 2834567 | 191873 | 100.000 | 100.000  |

## Compound 3p

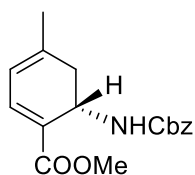

### HPLC Conditions

Column: Chiralcel OD-H, Daicel Chemical Industries, Ltd.

Eluent: hexanes/ethanol (80:20)

Flow rate: 1.0 mL/min

Detection: UV 210 nm

### Racemic

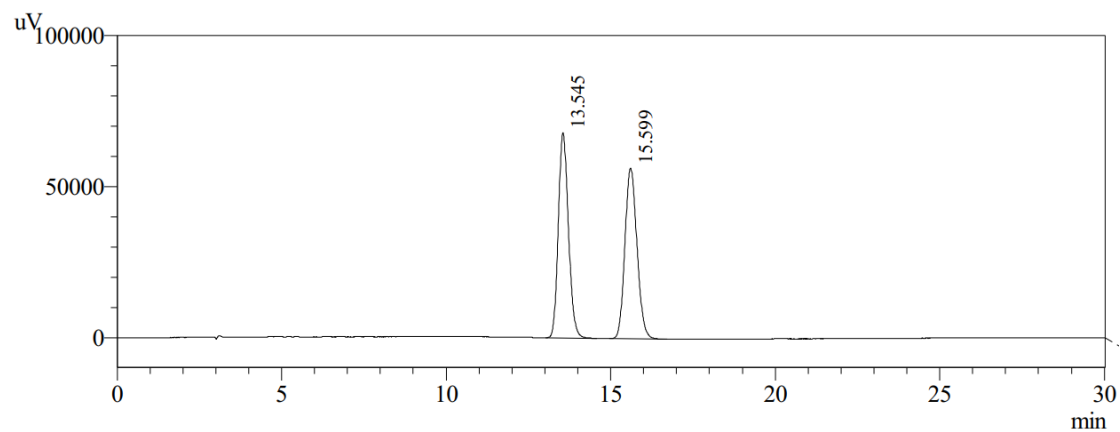

| Peak# | Ret. Time | Area    | Height | Area %  | Height % |
|-------|-----------|---------|--------|---------|----------|
| 1     | 13.545    | 1453937 | 68046  | 50.096  | 54.568   |
| 2     | 15.599    | 1448391 | 56653  | 49.904  | 45.432   |
| Total |           | 2902328 | 124699 | 100.000 | 100.000  |

### Chiral

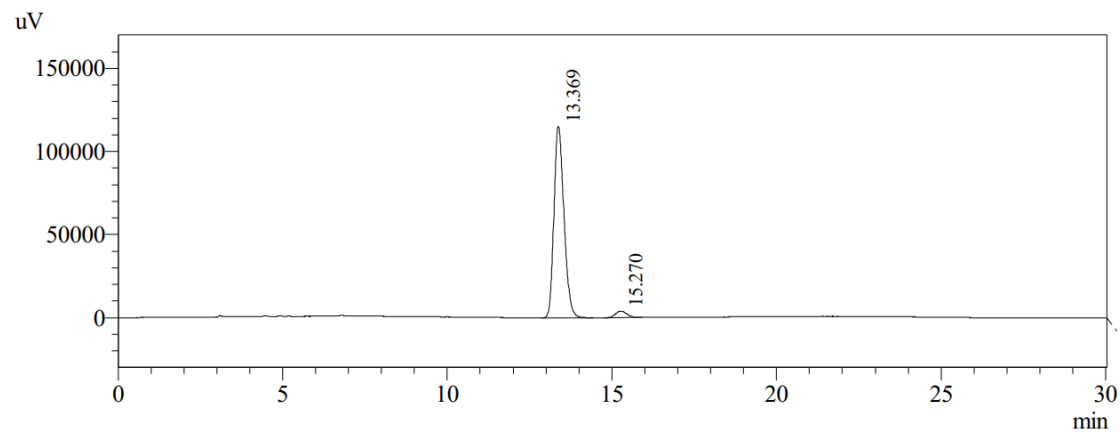

| Peak# | Ret. Time | Area    | Height | Area %  | Height % |
|-------|-----------|---------|--------|---------|----------|
| 1     | 13.369    | 2442771 | 115177 | 96.166  | 96.673   |
| 2     | 15.270    | 97391   | 3964   | 3.834   | 3.327    |
| Total |           | 2540162 | 119141 | 100.000 | 100.000  |

## Compound 3q

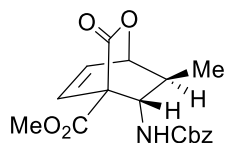

### HPLC Conditions

Column: Chiralcel AD-H, Daicel Chemical Industries, Ltd.

Eluent: hexanes/EtOH (80:20)

Flow rate: 1.0 mL/min

Detection: UV 210 nm

### Racemic

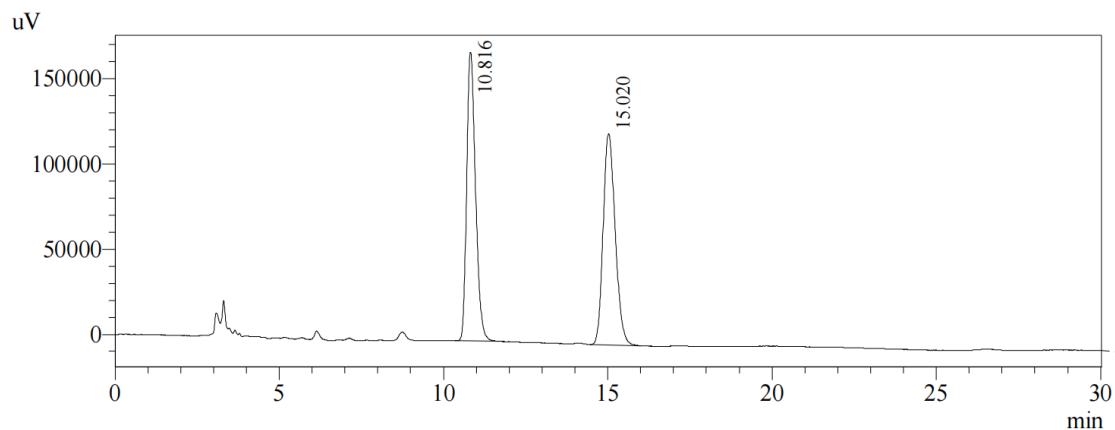

PDA Ch1 210nm 4nm

| Peak# | Ret. Time | Area    | Area %  |
|-------|-----------|---------|---------|
| 1     | 10.816    | 3179813 | 50.125  |
| 2     | 15.020    | 3163912 | 49.875  |
| Total |           | 6343724 | 100.000 |

### Chiral

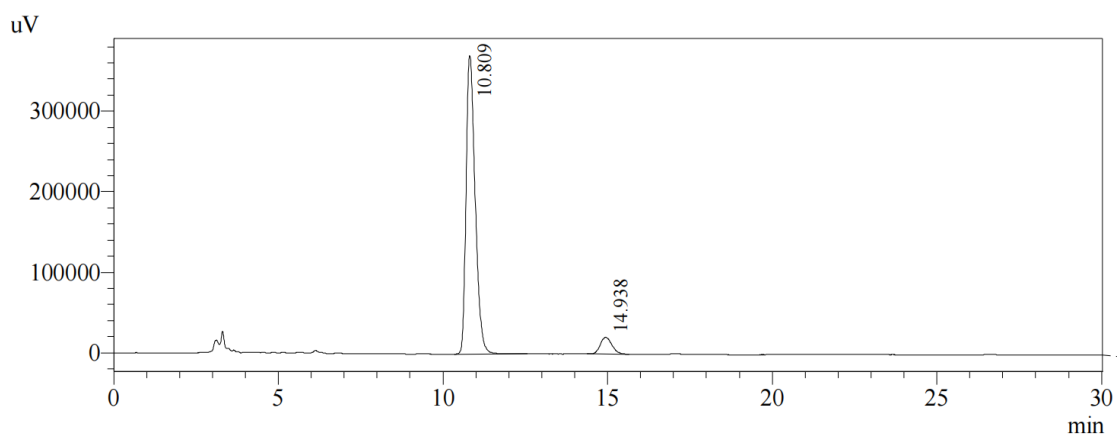

PDA Ch1 210nm 4nm

| Peak# | Ret. Time | Area    | Area %  |
|-------|-----------|---------|---------|
| 1     | 10.809    | 7113824 | 93.282  |
| 2     | 14.938    | 512354  | 6.718   |
| Total |           | 7626178 | 100.000 |

## Compound 3r

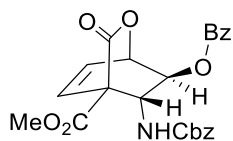

### HPLC Conditions

Column: Chiralcel OD-H, Daicel Chemical Industries, Ltd.

Eluent: hexanes/EtOH (80:20)

Flow rate: 1.0 mL/min

Detection: UV 210 nm

### Racemic

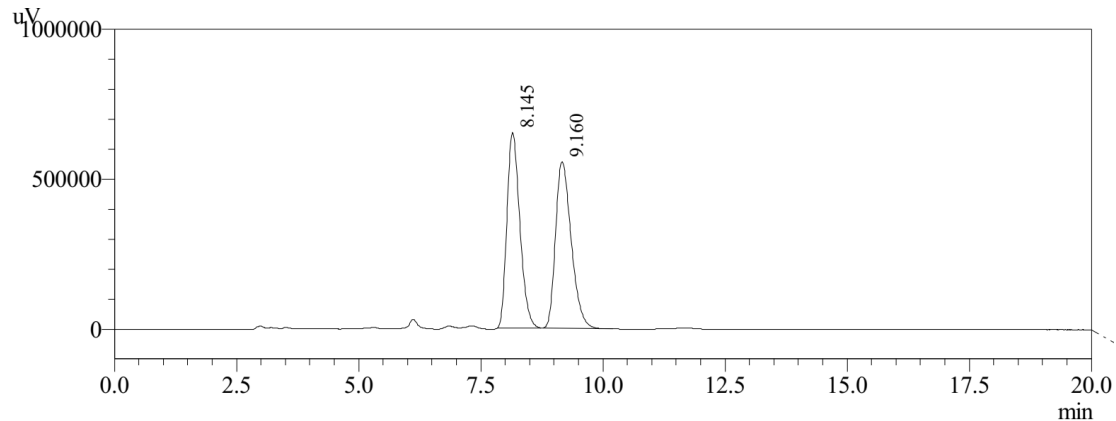

| Peak# | Ret. Time | Area     | Height  | Area %  | Height % |
|-------|-----------|----------|---------|---------|----------|
| 1     | 8.145     | 12016389 | 652847  | 49.197  | 53.977   |
| 2     | 9.160     | 12408738 | 556642  | 50.803  | 46.023   |
| Total |           | 24425127 | 1209489 | 100.000 | 100.000  |

### Chiral

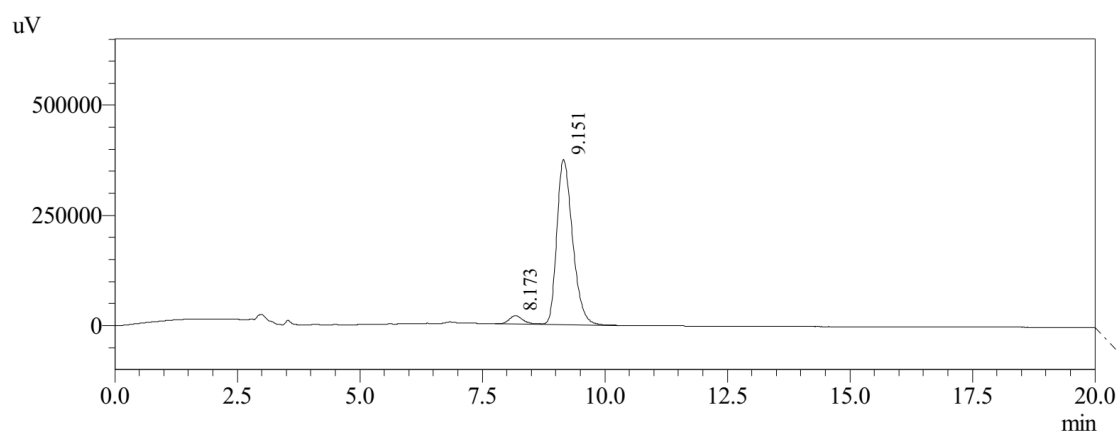

| Peak# | Ret. Time | Area    | Height | Area %  | Height % |
|-------|-----------|---------|--------|---------|----------|
| 1     | 8.173     | 362320  | 18742  | 4.150   | 4.769    |
| 2     | 9.151     | 8369041 | 374285 | 95.850  | 95.231   |
| Total |           | 8731361 | 393027 | 100.000 | 100.000  |

## Compound 3s

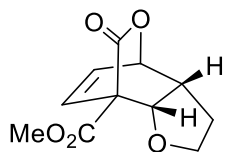

### HPLC Conditions

Column: Chiralcel OD-H, Daicel Chemical Industries, Ltd.

Eluent: hexanes/EtOH (90:10)

Flow rate: 1.0 mL/min

Detection: UV 210 nm

### Racemic

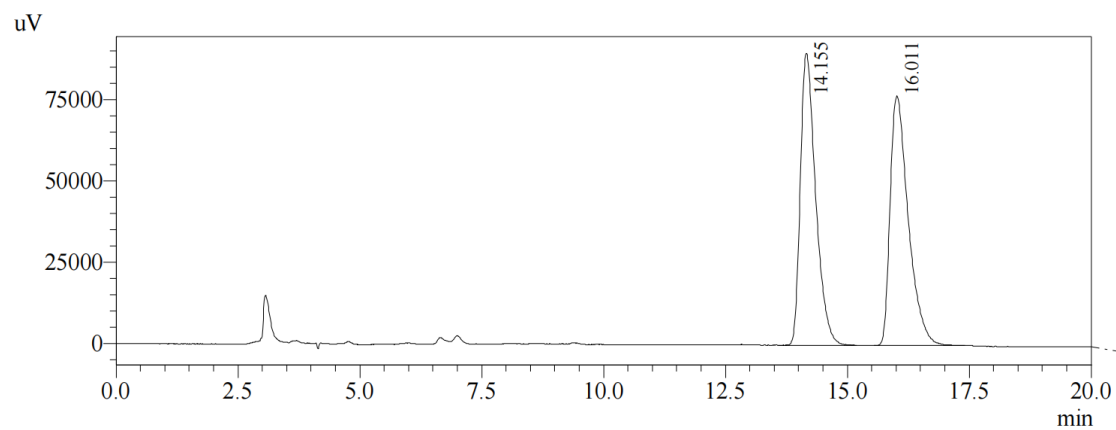

PDA Ch1 210nm 4nm

| Peak# | Ret. Time | Area    | Area %  |
|-------|-----------|---------|---------|
| 1     | 14.155    | 1970125 | 49.738  |
| 2     | 16.011    | 1990848 | 50.262  |
| Total |           | 3960973 | 100.000 |

### Chiral

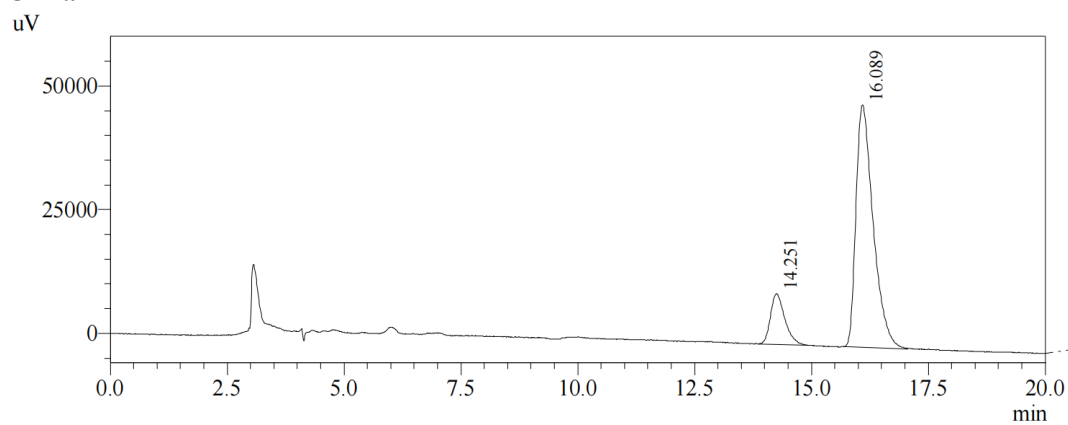

PDA Ch1 210nm 4nm

| Peak# | Ret. Time | Area    | Area %  |
|-------|-----------|---------|---------|
| 1     | 14.251    | 219698  | 14.925  |
| 2     | 16.089    | 1252273 | 85.075  |
| Total |           | 1471971 | 100.000 |



## Compound 3t

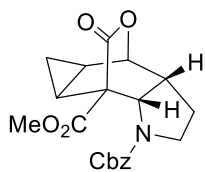

### HPLC Conditions

Column: Chiralcel OD-H, Daicel Chemical Industries, Ltd.

Eluent: hexanes/ethanol (80:20)

Flow rate: 1.0 mL/min

Detection: UV 210 nm

### Racemic

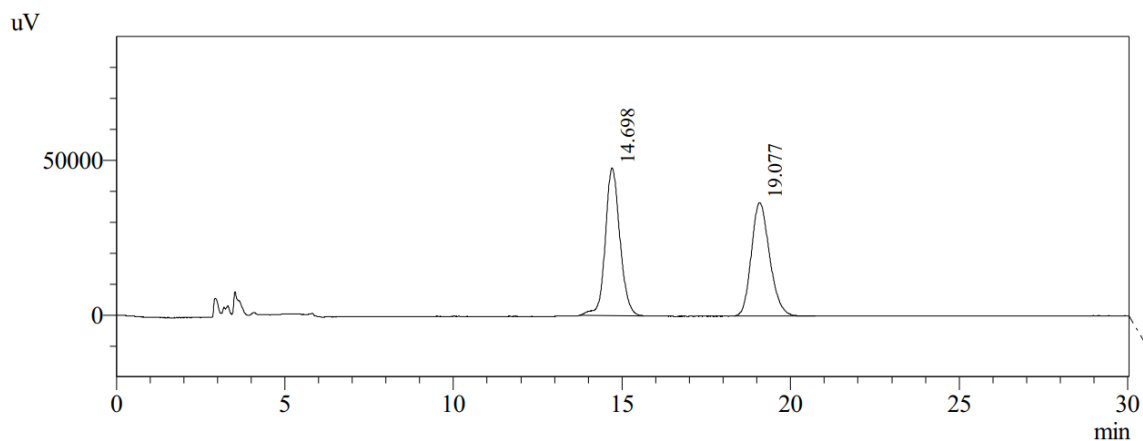

| Peak# | Ret. Time | Area    | Height | Area %  | Height % |
|-------|-----------|---------|--------|---------|----------|
| 1     | 14.698    | 1445197 | 47776  | 50.995  | 56.542   |
| 2     | 19.077    | 1388825 | 36721  | 49.005  | 43.458   |
| Total |           | 2834022 | 84496  | 100.000 | 100.000  |

### Chiral

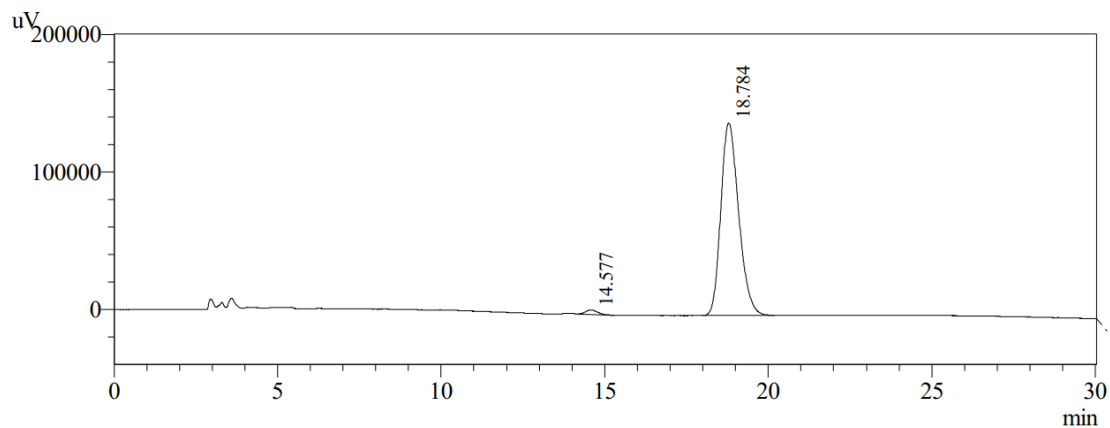

| Peak# | Ret. Time | Area    | Height | Area %  | Height % |
|-------|-----------|---------|--------|---------|----------|
| 1     | 14.577    | 84391   | 3167   | 1.564   | 2.217    |
| 2     | 18.784    | 5312263 | 139715 | 98.436  | 97.783   |
| Total |           | 5396654 | 142882 | 100.000 | 100.000  |

## Compound 3u

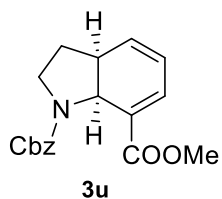

### HPLC Conditions

Column: Chiralcel OD-H, Daicel Chemical Industries, Ltd.

Eluent: hexanes/ethanol (80:20)

Flow rate: 1.0 mL/min

Detection: UV 210 nm

### Racemic

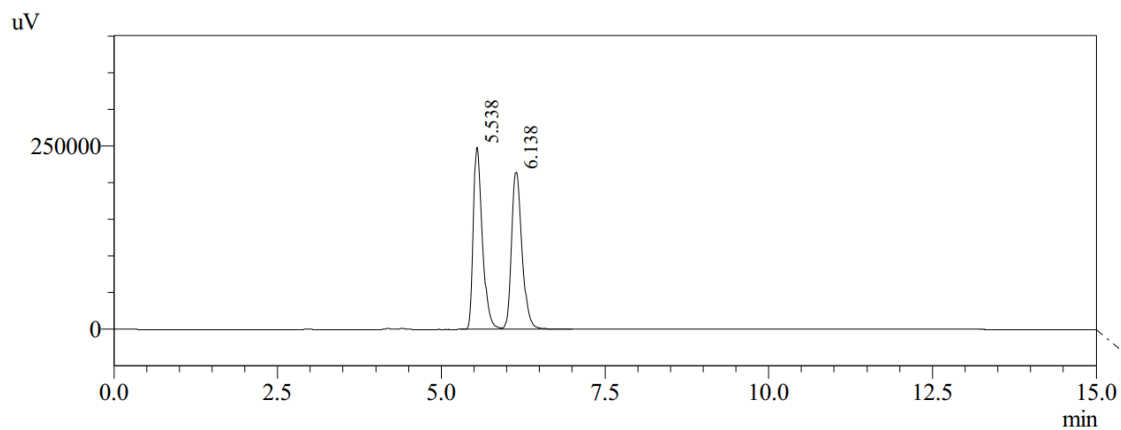

| Peak# | Ret. Time | Area    | Height | Area %  | Height % |
|-------|-----------|---------|--------|---------|----------|
| 1     | 5.538     | 2402141 | 248549 | 50.123  | 53.694   |
| 2     | 6.138     | 2390393 | 214354 | 49.877  | 46.306   |
| Total |           | 4792534 | 462904 | 100.000 | 100.000  |

### Chiral

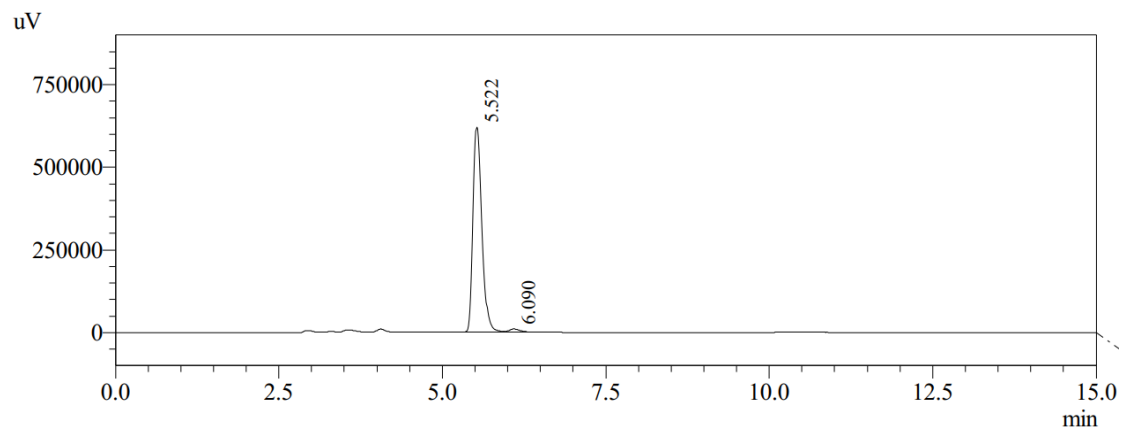

| Peak# | Ret. Time | Area    | Height | Area %  | Height % |
|-------|-----------|---------|--------|---------|----------|
| 1     | 5.522     | 5902774 | 620835 | 97.834  | 98.360   |
| 2     | 6.090     | 130670  | 10349  | 2.166   | 1.640    |
| Total |           | 6033444 | 631183 | 100.000 | 100.000  |

## Compound 3v

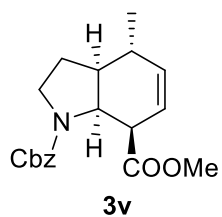

### HPLC Conditions

Column: Chiralcel AD-H, Daicel Chemical Industries, Ltd.

Eluent: hexanes/ethanol (90:10)

Flow rate: 1.0 mL/min

Detection: UV 210 nm

### Racemic

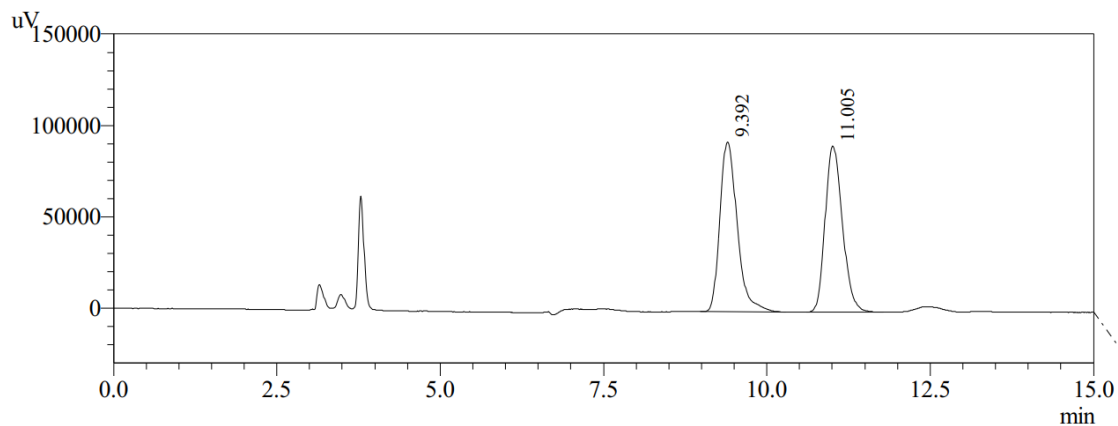

| Peak# | Ret. Time | Area    | Height | Area %  | Height % |
|-------|-----------|---------|--------|---------|----------|
| 1     | 9.392     | 1716399 | 92787  | 50.534  | 50.518   |
| 2     | 11.005    | 1680142 | 90884  | 49.466  | 49.482   |
| Total |           | 3396541 | 183671 | 100.000 | 100.000  |

### Chiral

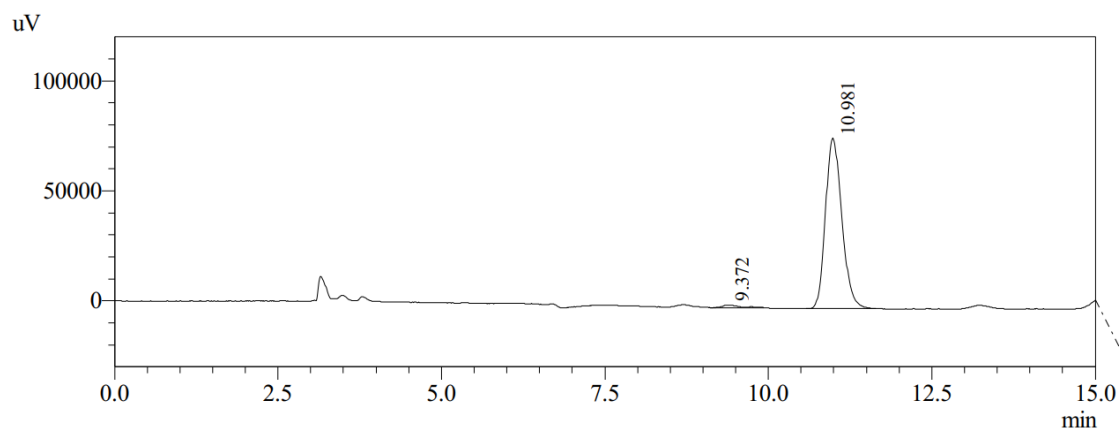

| Peak# | Ret. Time | Area    | Height | Area %  | Height % |
|-------|-----------|---------|--------|---------|----------|
| 1     | 9.372     | 20378   | 1196   | 1.480   | 1.520    |
| 2     | 10.981    | 1356342 | 77471  | 98.520  | 98.480   |
| Total |           | 1376720 | 78666  | 100.000 | 100.000  |

## Compound 4

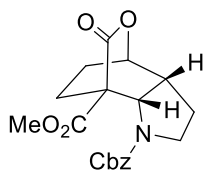

### HPLC Conditions

Column: Chiralcel IA-H, Daicel Chemical Industries, Ltd.

Eluent: hexanes/ethanol (80:20)

Flow rate: 1.0 mL/min

Detection: UV 210 nm

### Racemic

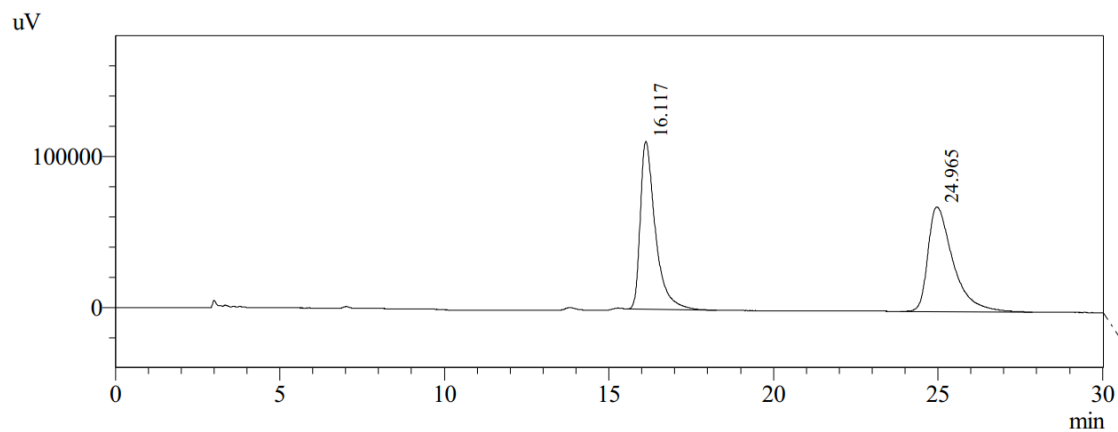

| Peak# | Ret. Time | Area    | Height | Area %  | Height % |
|-------|-----------|---------|--------|---------|----------|
| 1     | 16.117    | 3559033 | 111235 | 48.984  | 61.532   |
| 2     | 24.965    | 3706643 | 69541  | 51.016  | 38.468   |
| Total |           | 7265676 | 180777 | 100.000 | 100.000  |

### Chiral

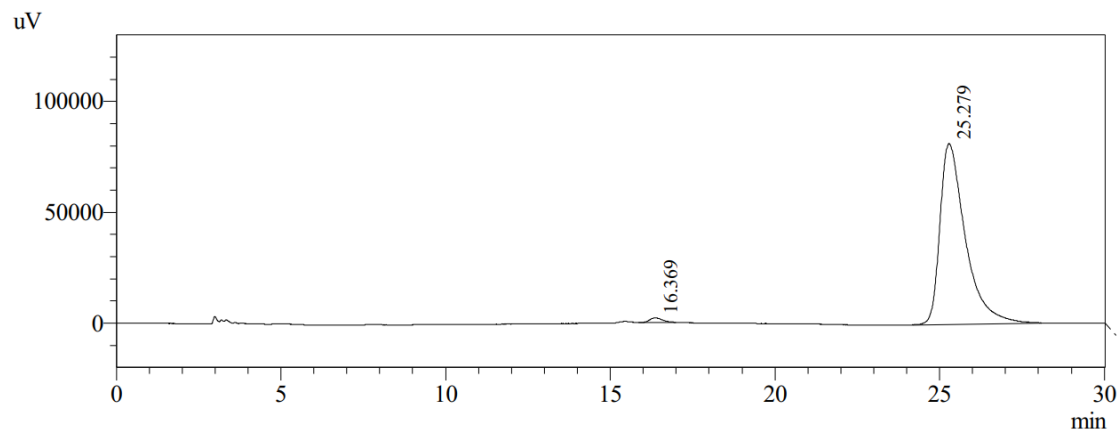

| Peak# | Ret. Time | Area    | Height | Area %  | Height % |
|-------|-----------|---------|--------|---------|----------|
| 1     | 16.369    | 59367   | 2132   | 1.338   | 2.547    |
| 2     | 25.279    | 4378507 | 81577  | 98.662  | 97.453   |
| Total |           | 4437874 | 83709  | 100.000 | 100.000  |

# 10. NMR Spectra of New Compounds

## Compound 3a

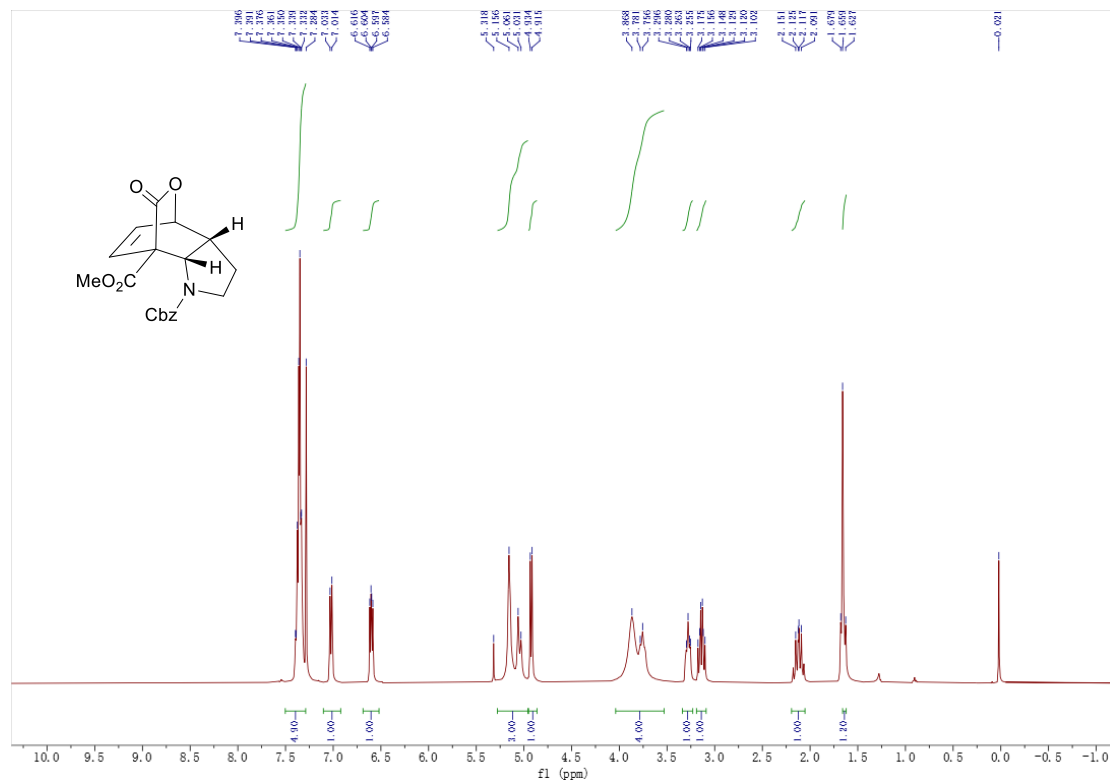

<sup>1</sup>H NMR of Compound 3a

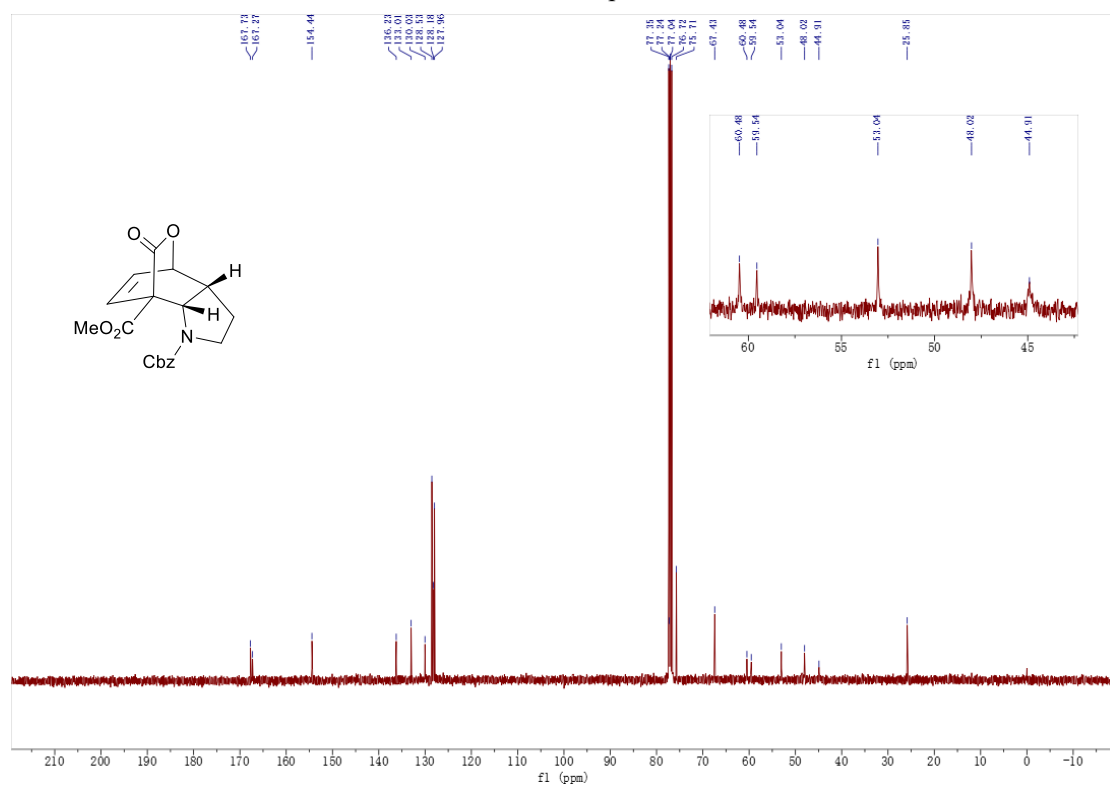

<sup>13</sup>C NMR of Compound 3a

### Compound 3b

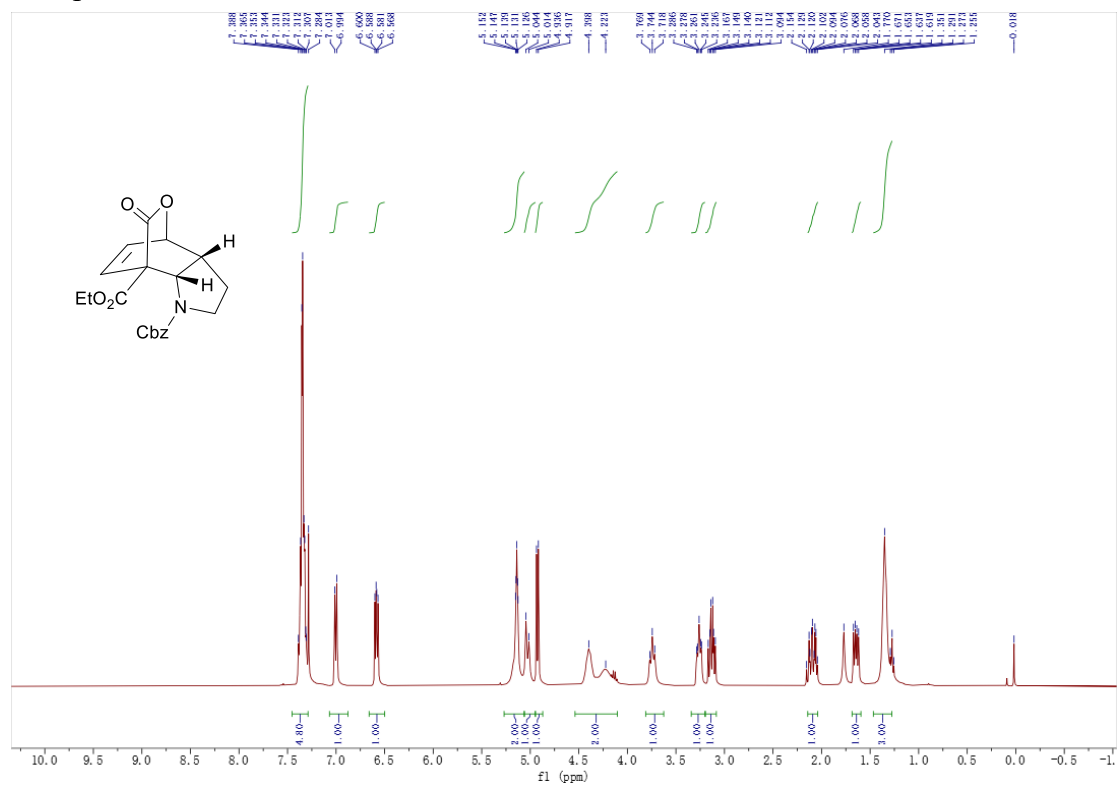

### <sup>1</sup>H NMR of Compound 3b

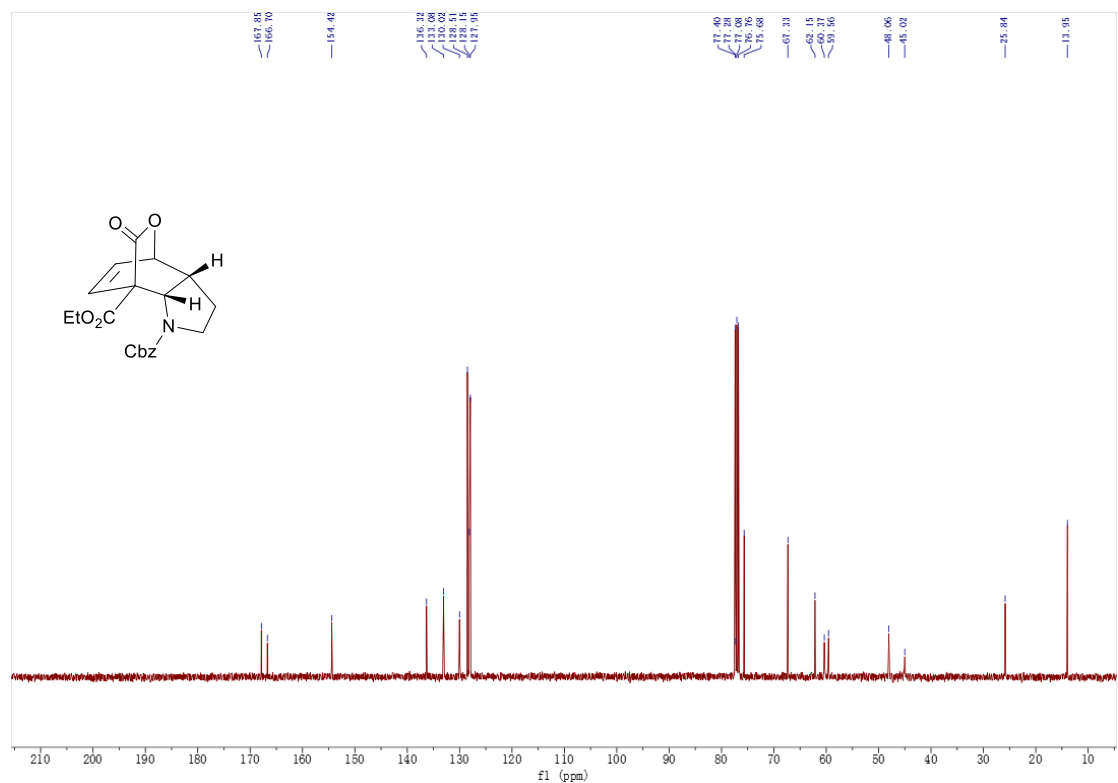

### <sup>13</sup>C NMR of Compound 3b

### Compound 3c

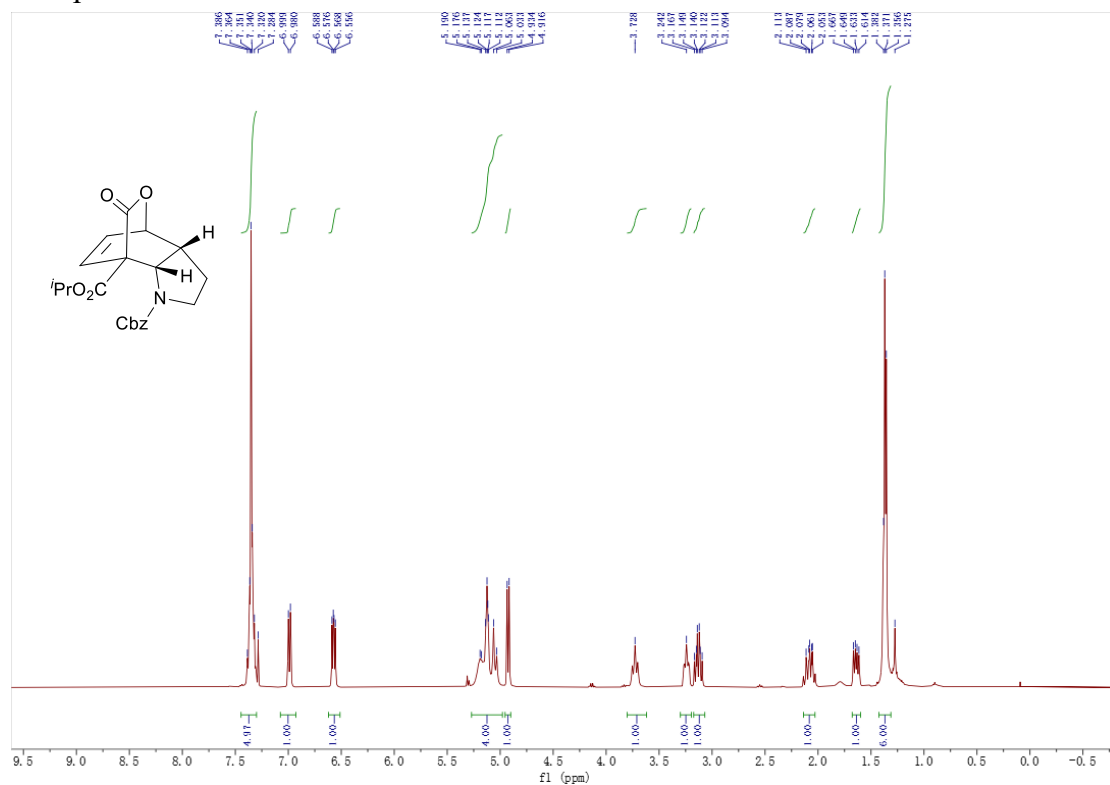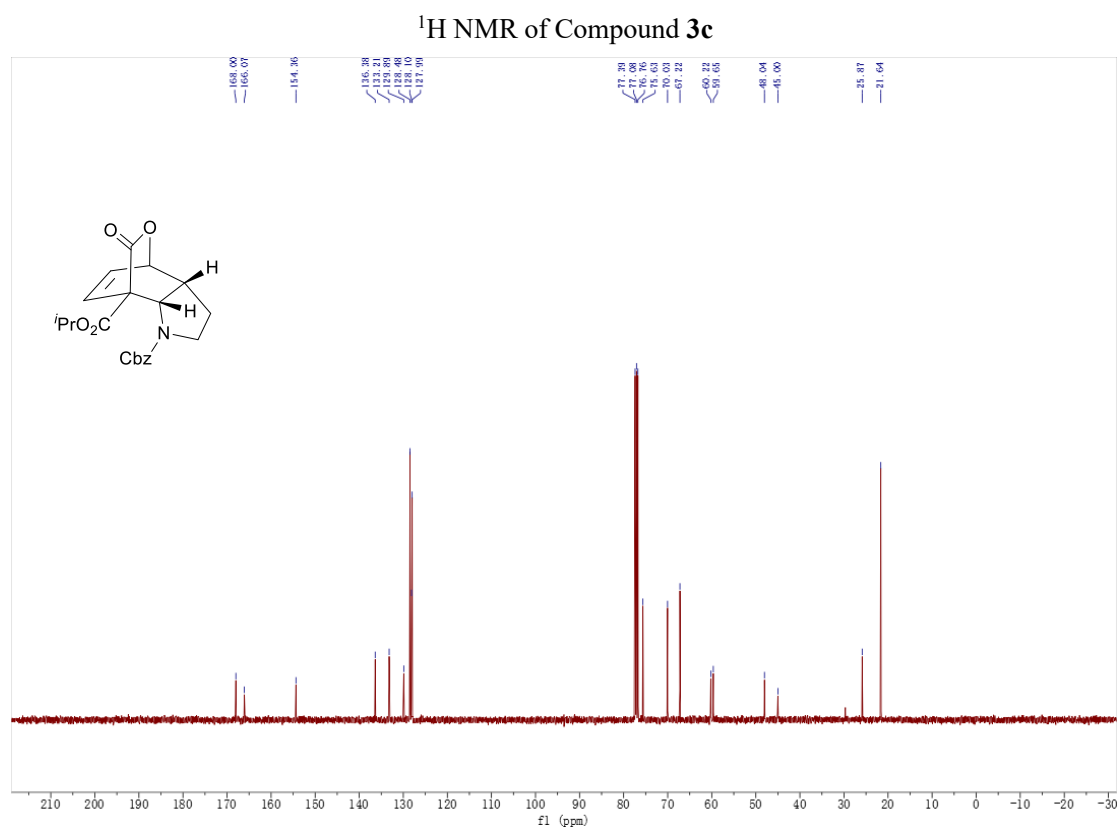

### Compound 3d

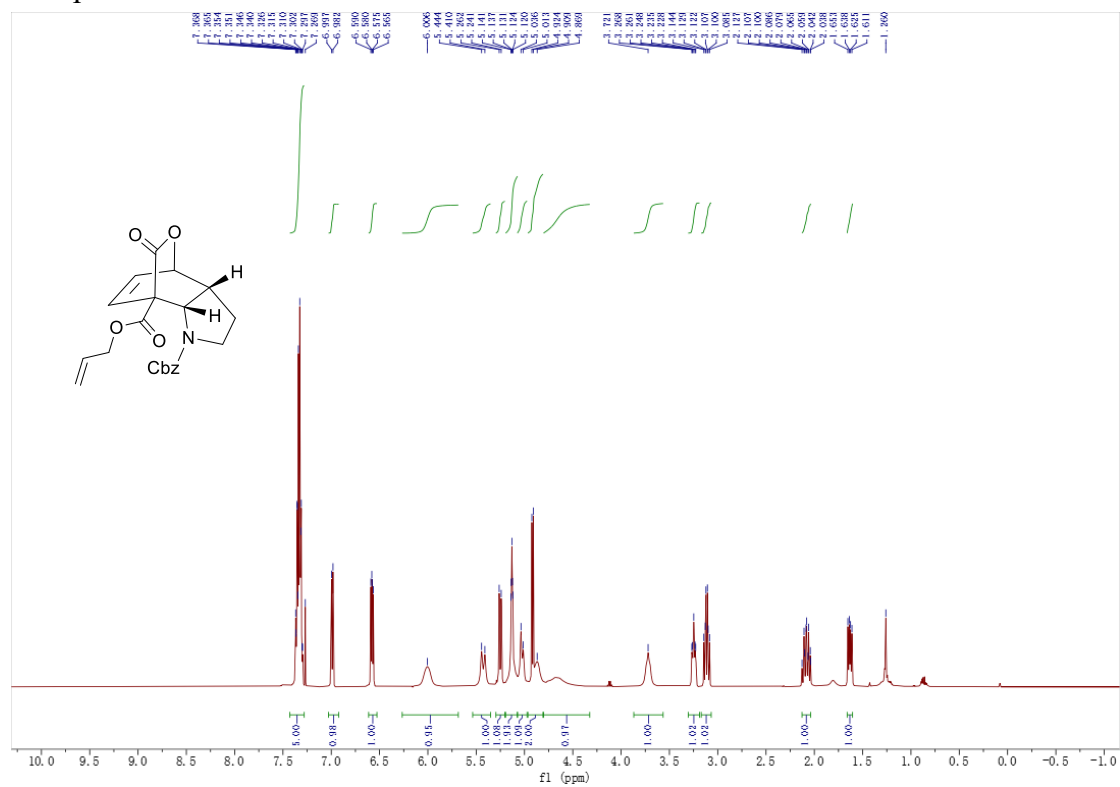

### <sup>1</sup>H NMR of Compound 3d

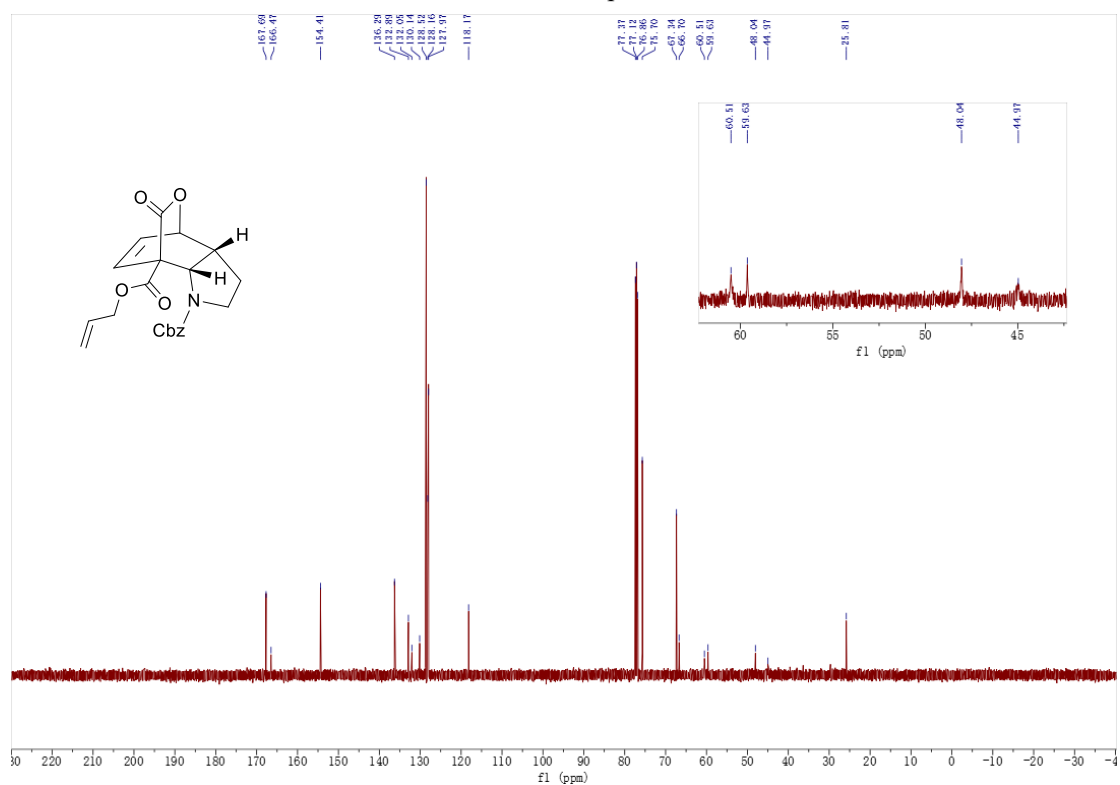

### <sup>13</sup>C NMR of Compound 3d



# Compound 3e

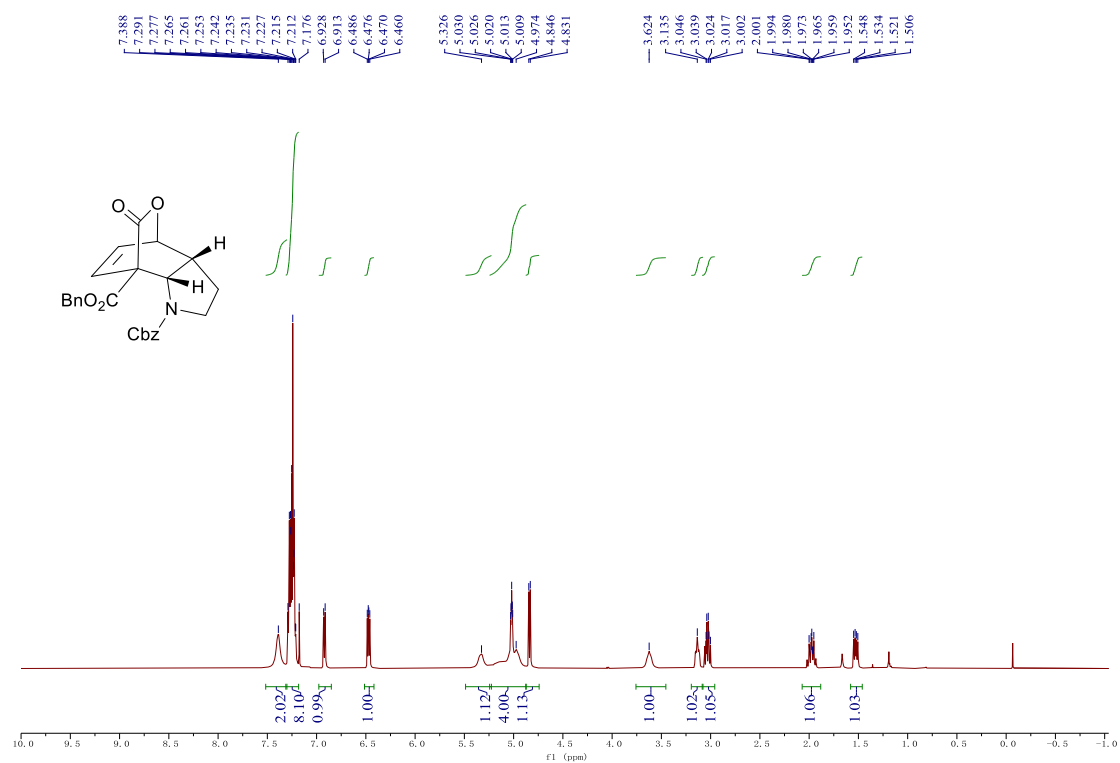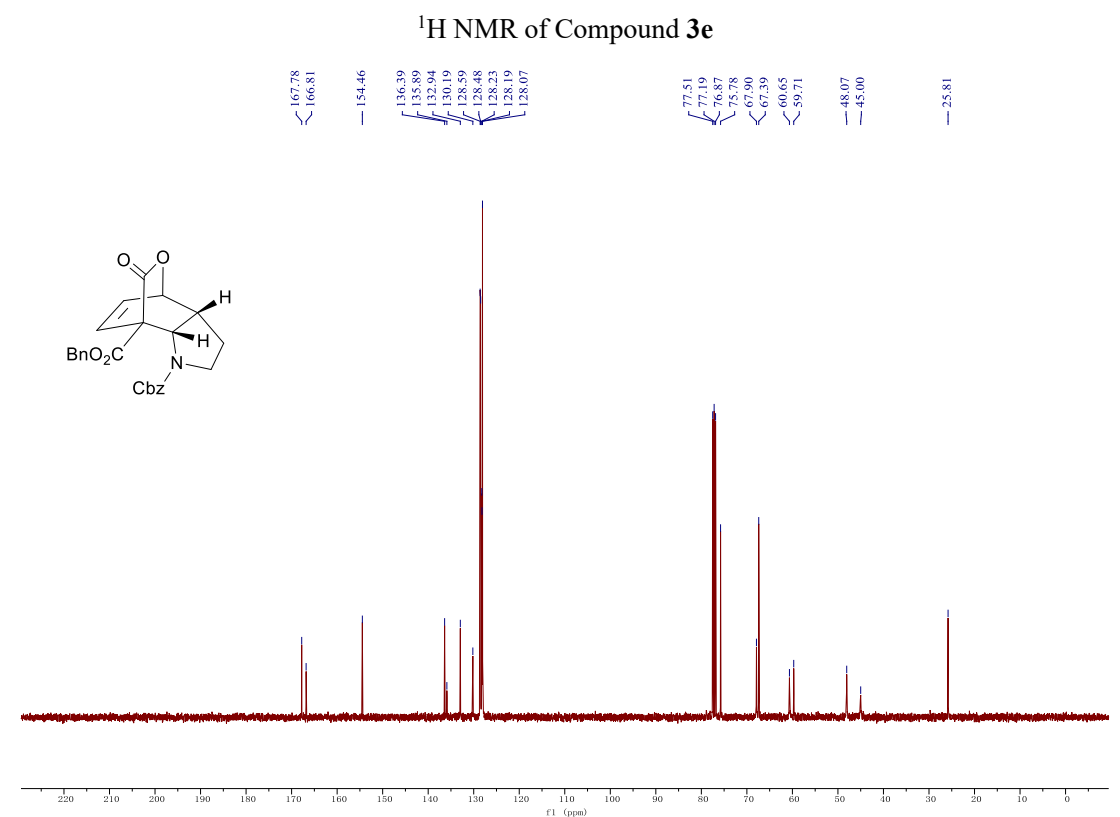

### Compound 3f

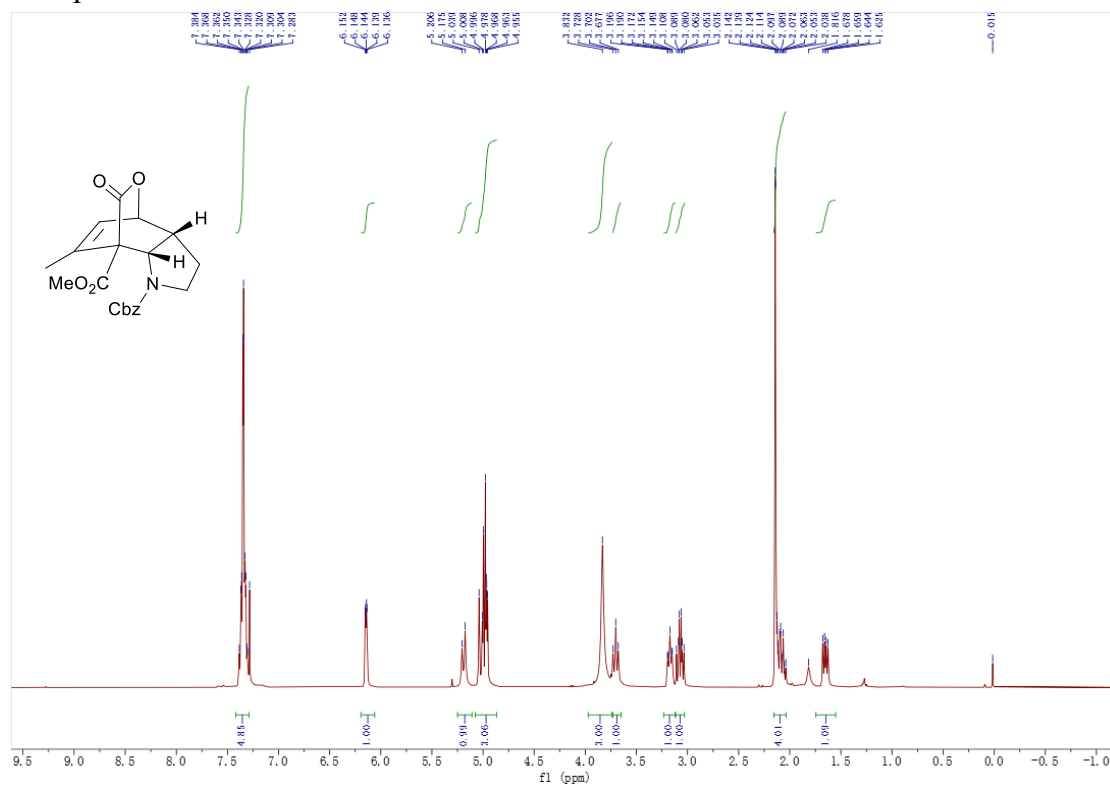

### <sup>1</sup>H NMR of Compound 3f

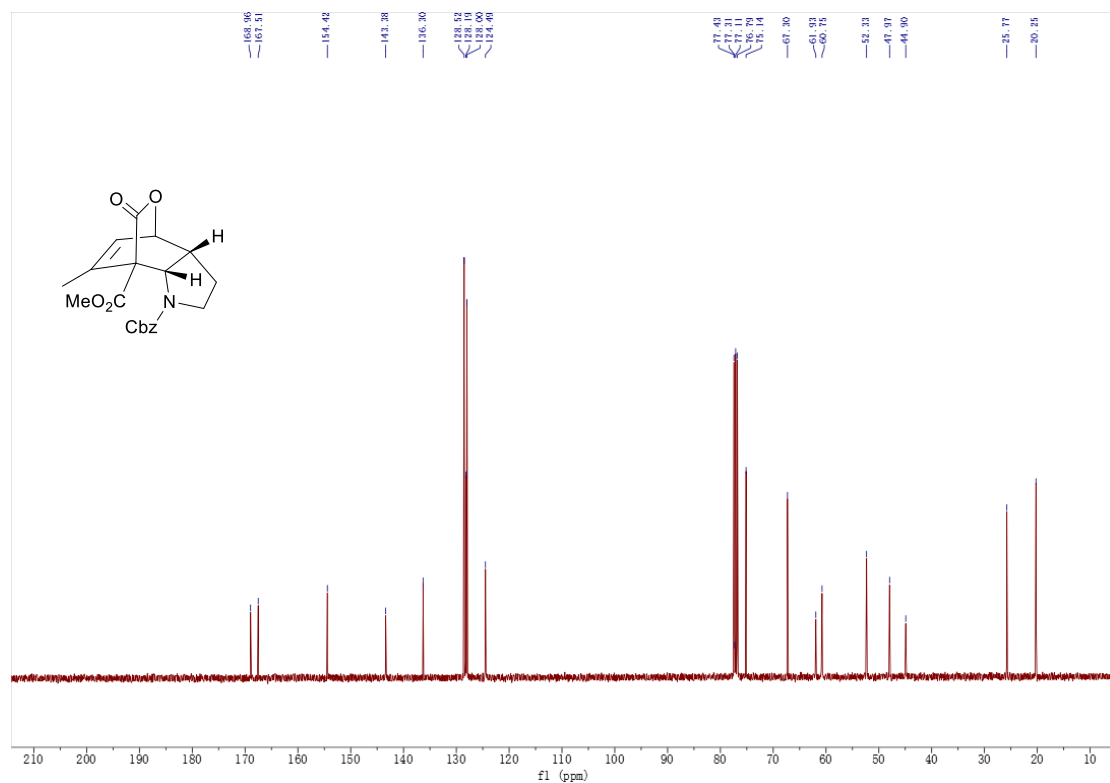

### <sup>13</sup>C NMR of Compound 3f

# Compound 3g

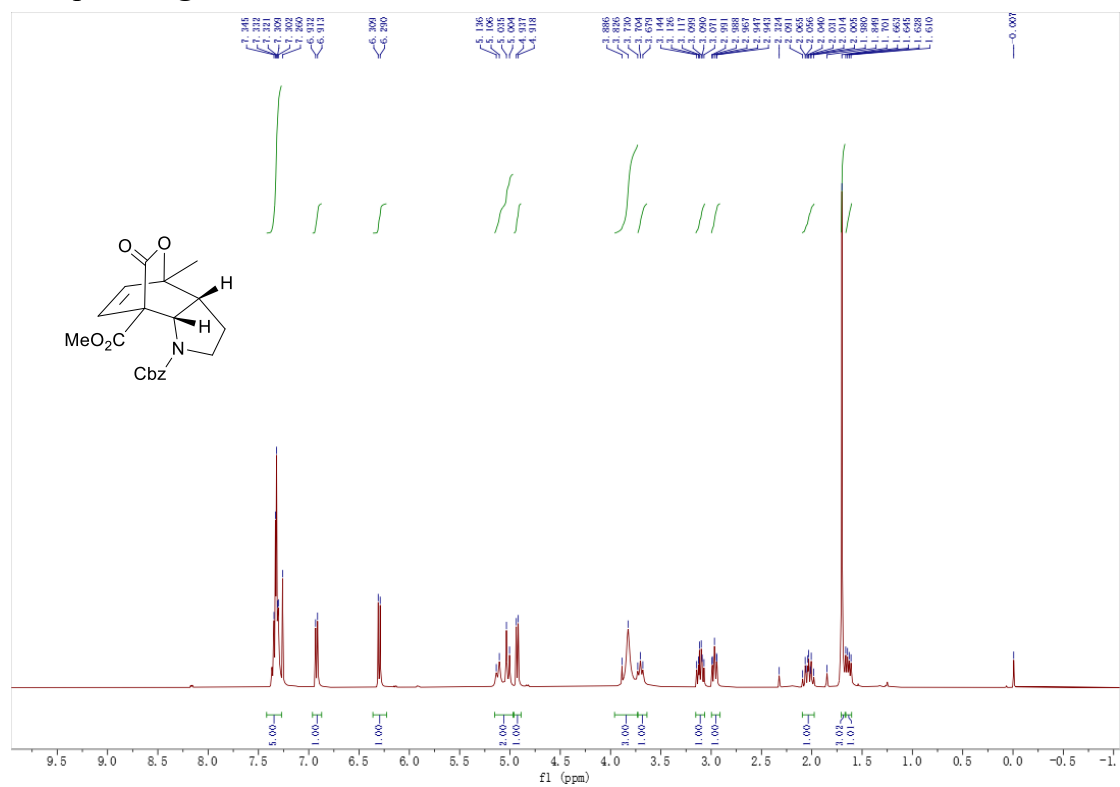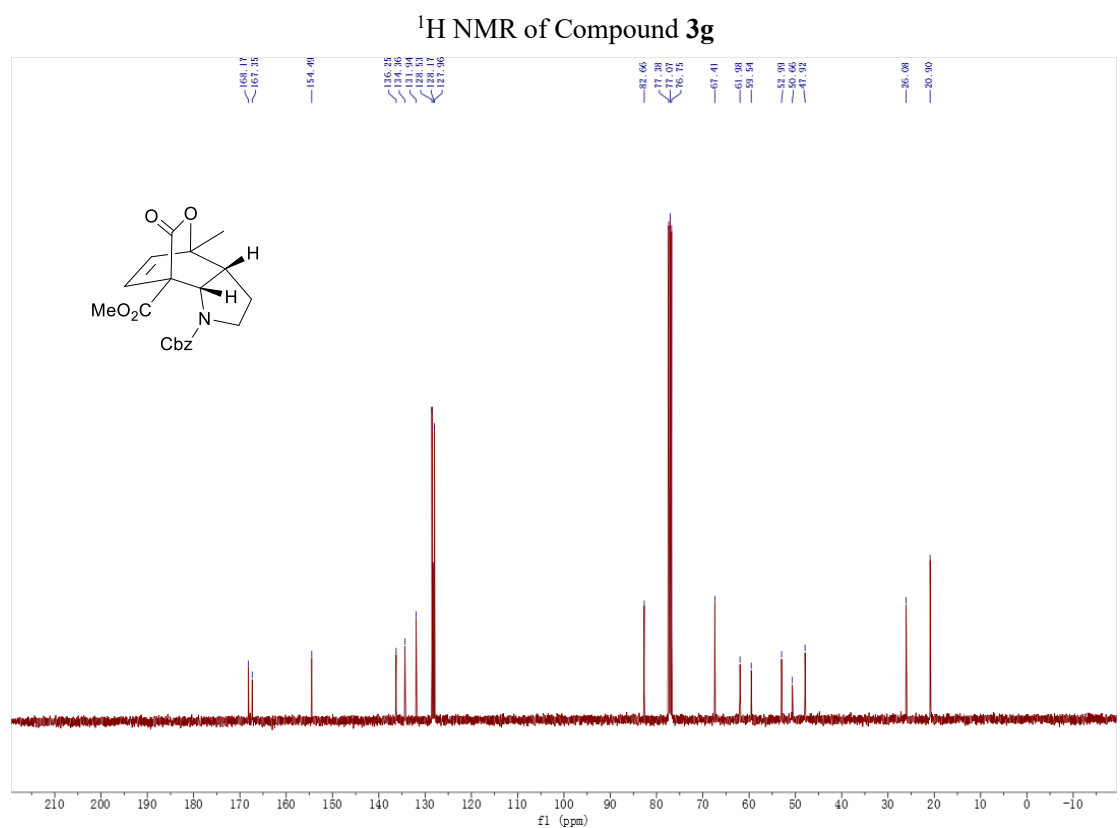

# Compound 3i

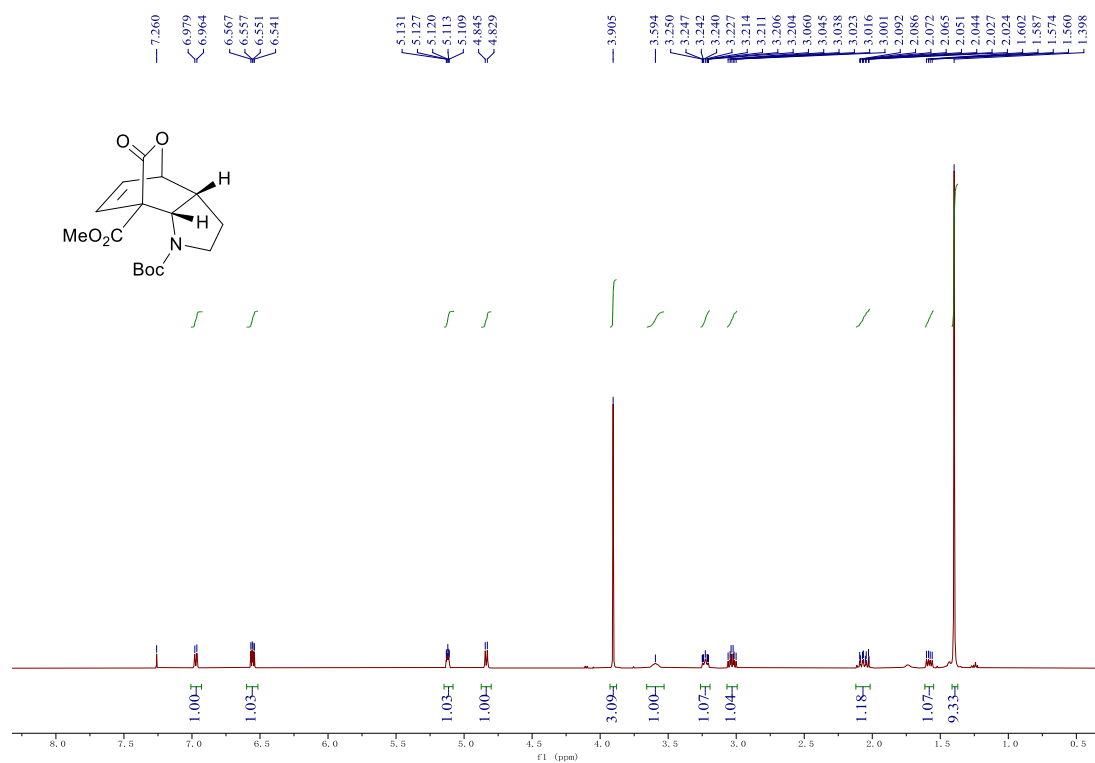

## <sup>1</sup>H NMR of Compound 3i

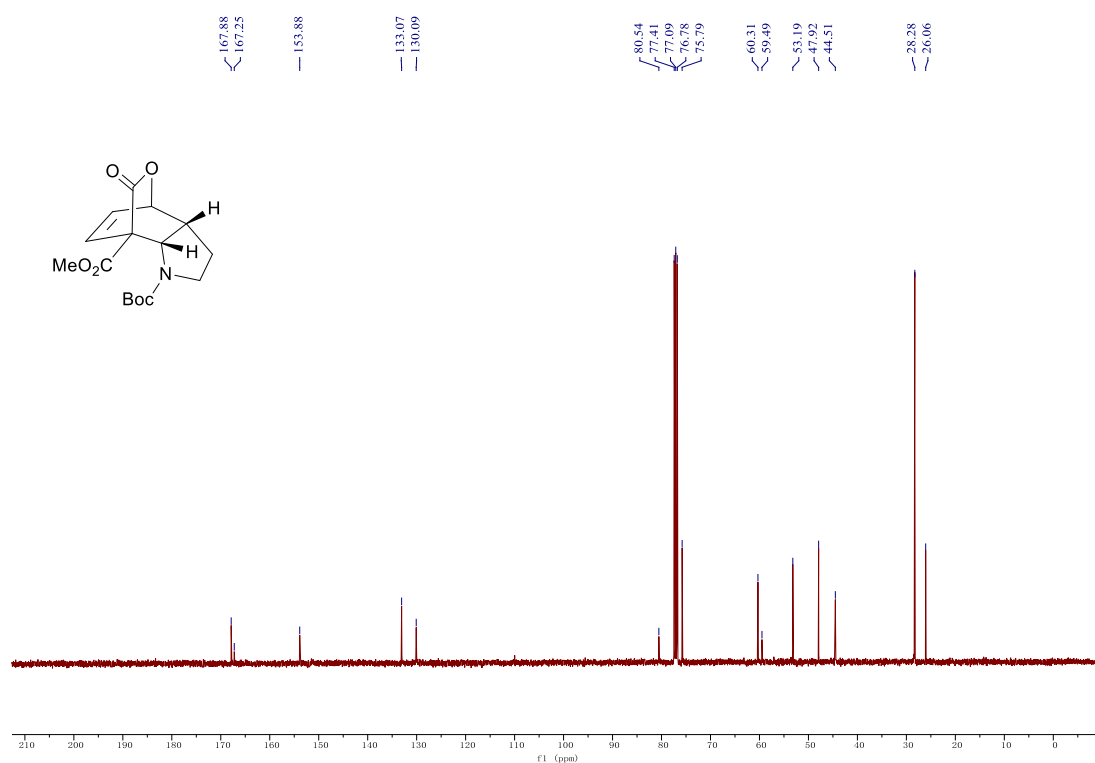

## <sup>13</sup>C NMR of Compound 3i

# Compound 3j

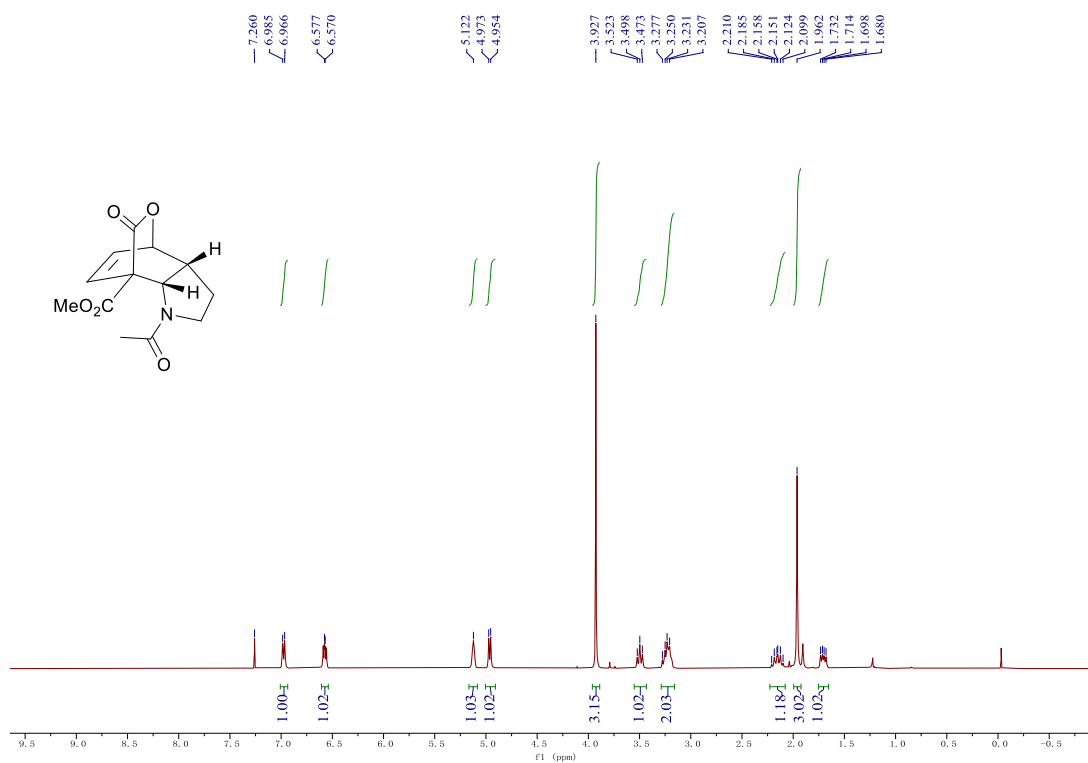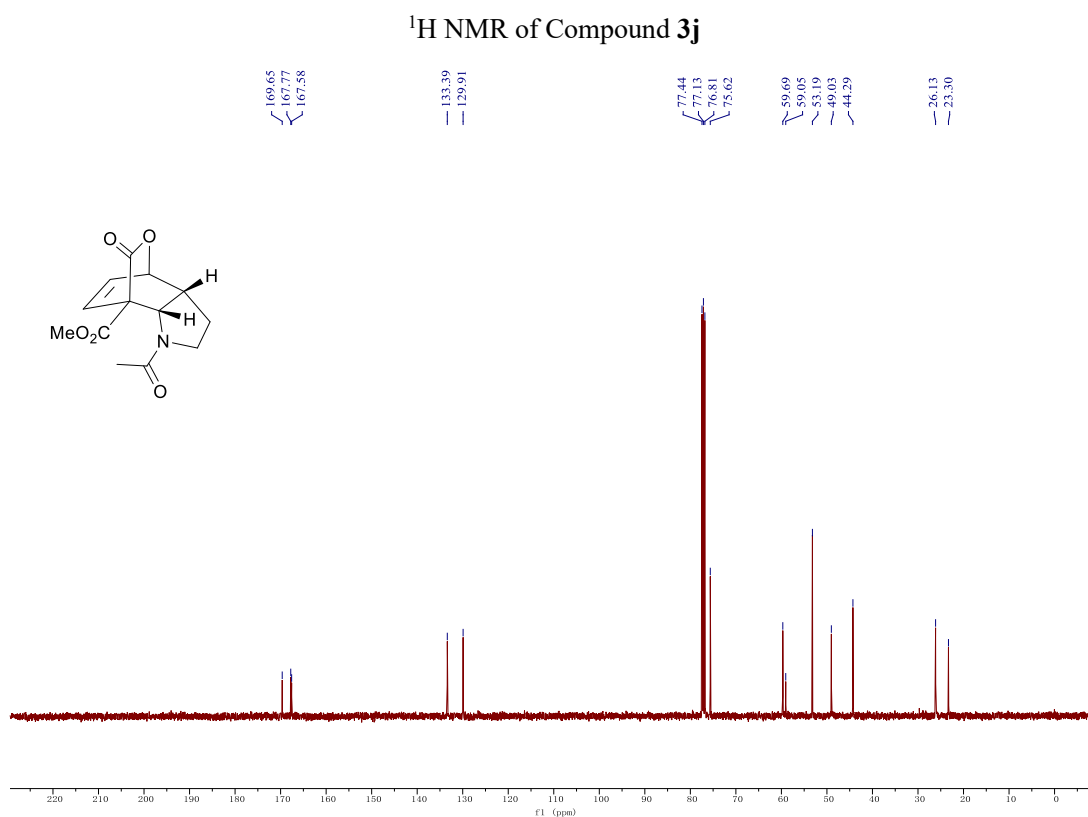

# Compound 3k

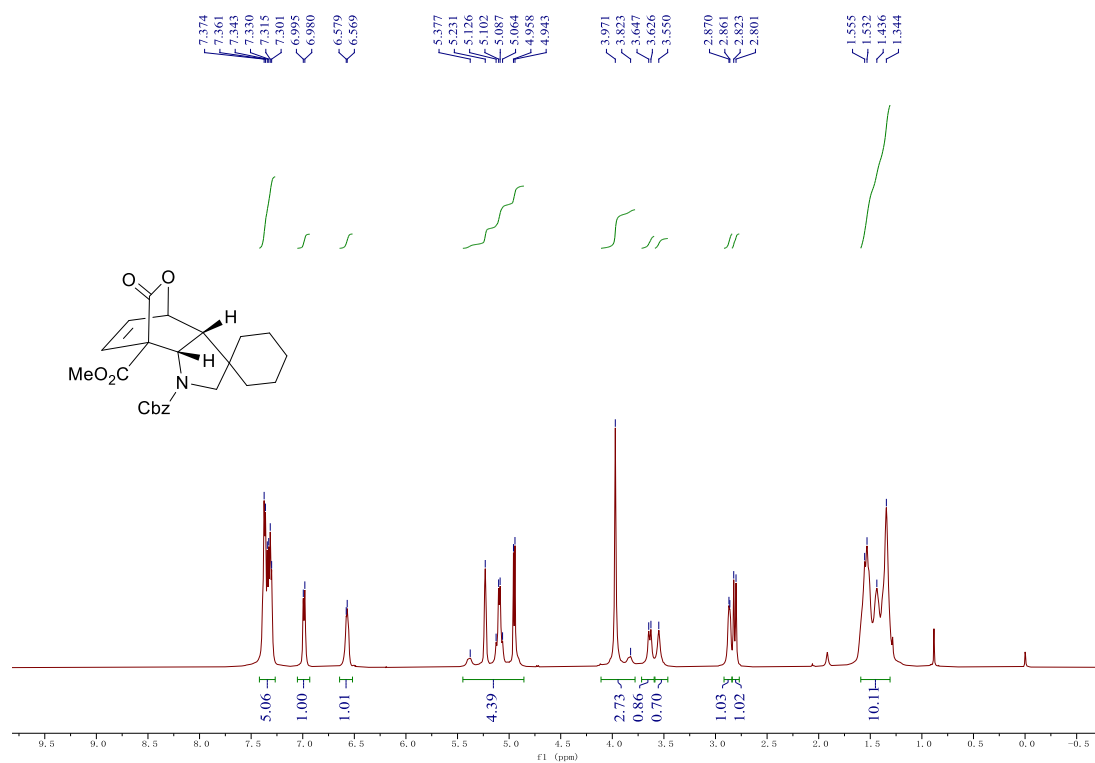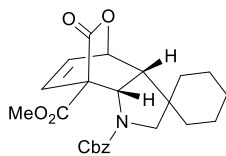

## <sup>1</sup>H NMR of Compound 3k

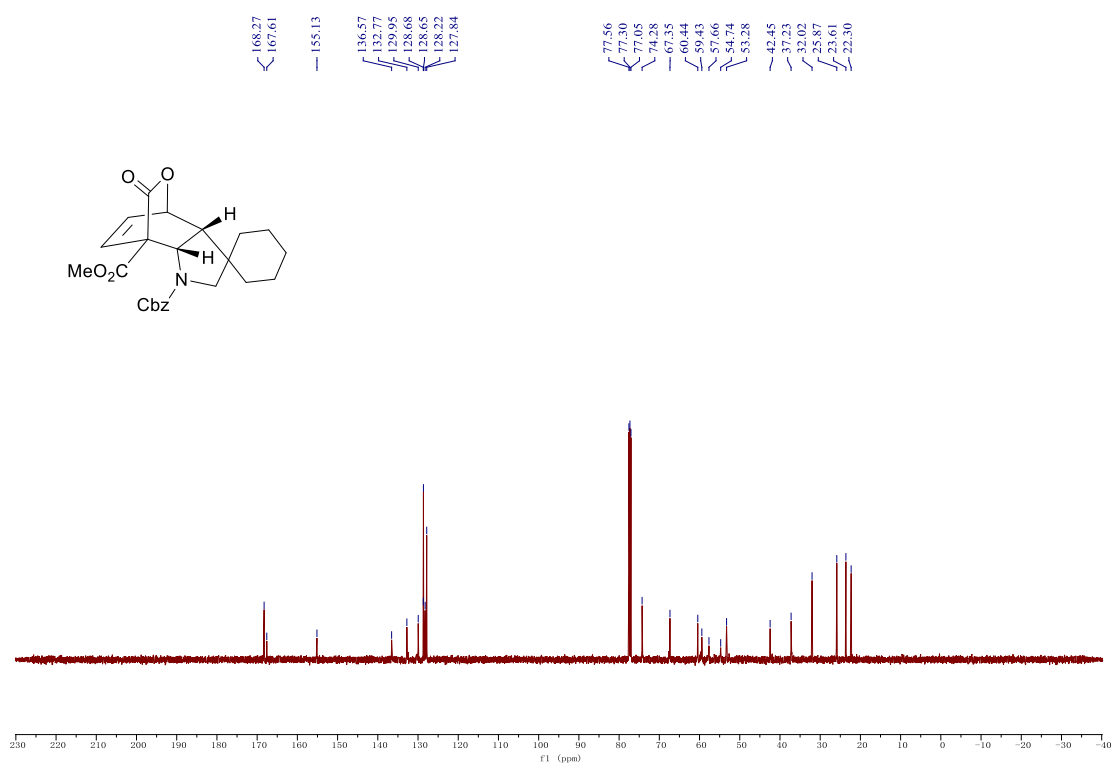

## <sup>13</sup>C NMR of Compound 3k

# Compound 31

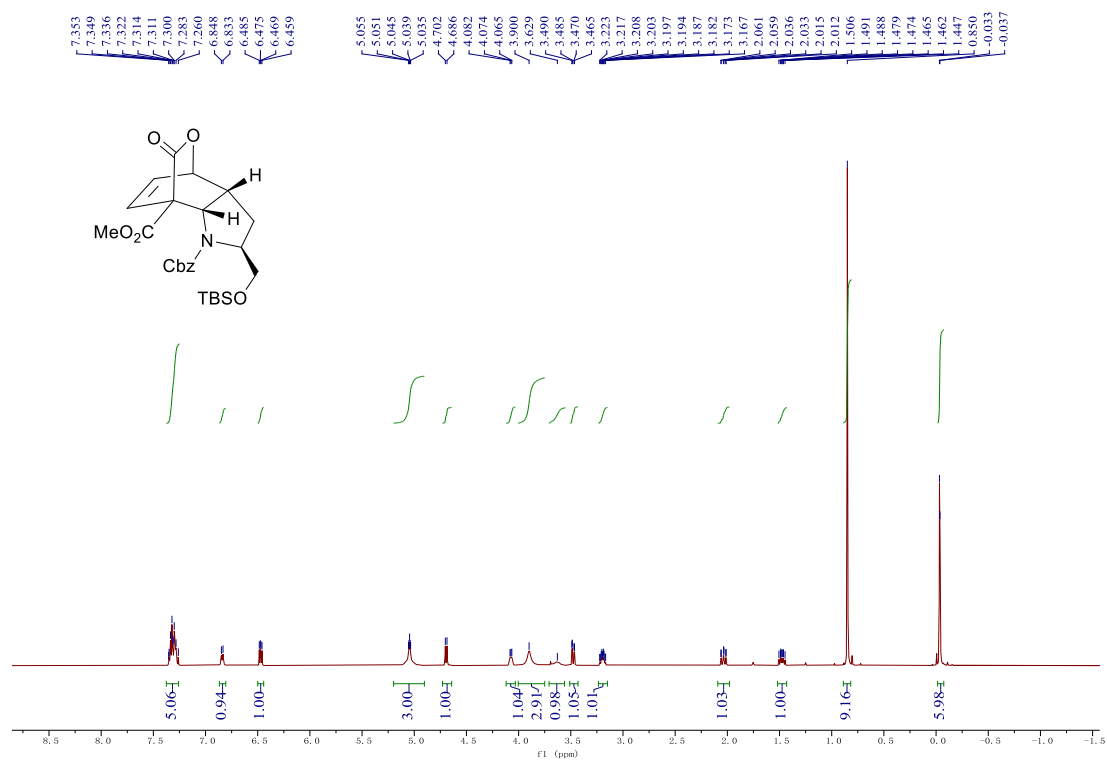

## <sup>1</sup>H NMR of Compound 31

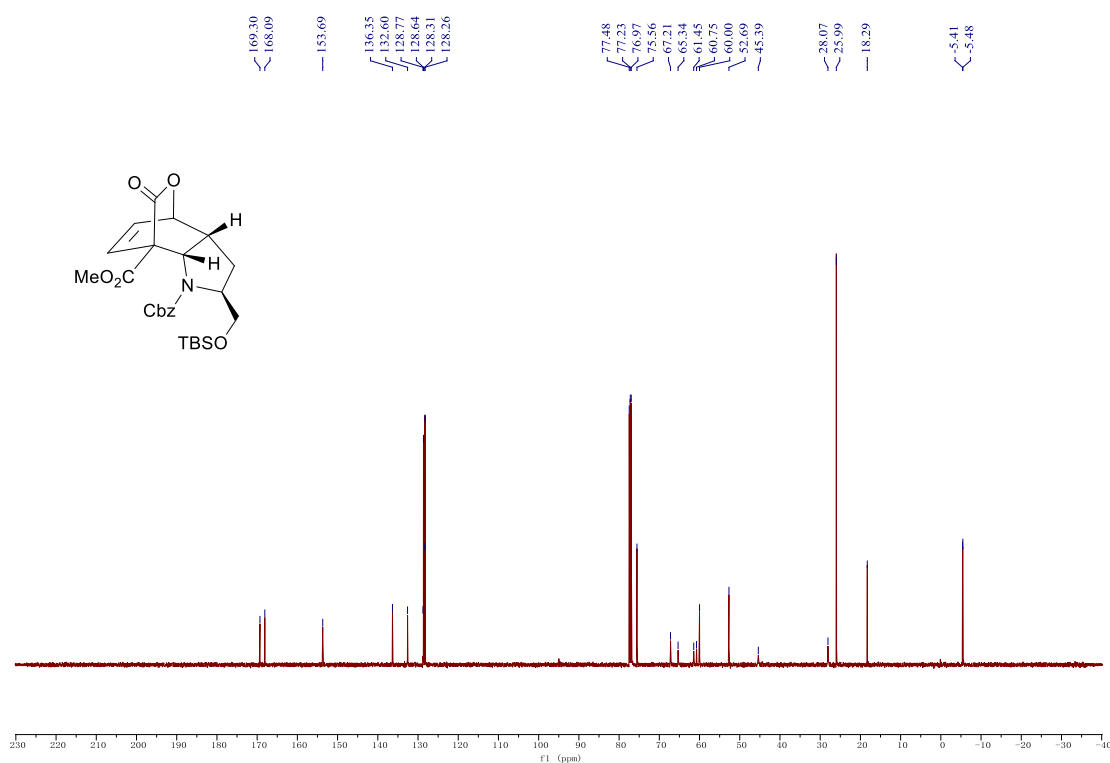

## <sup>13</sup>C NMR of Compound 31

# Compound 3m

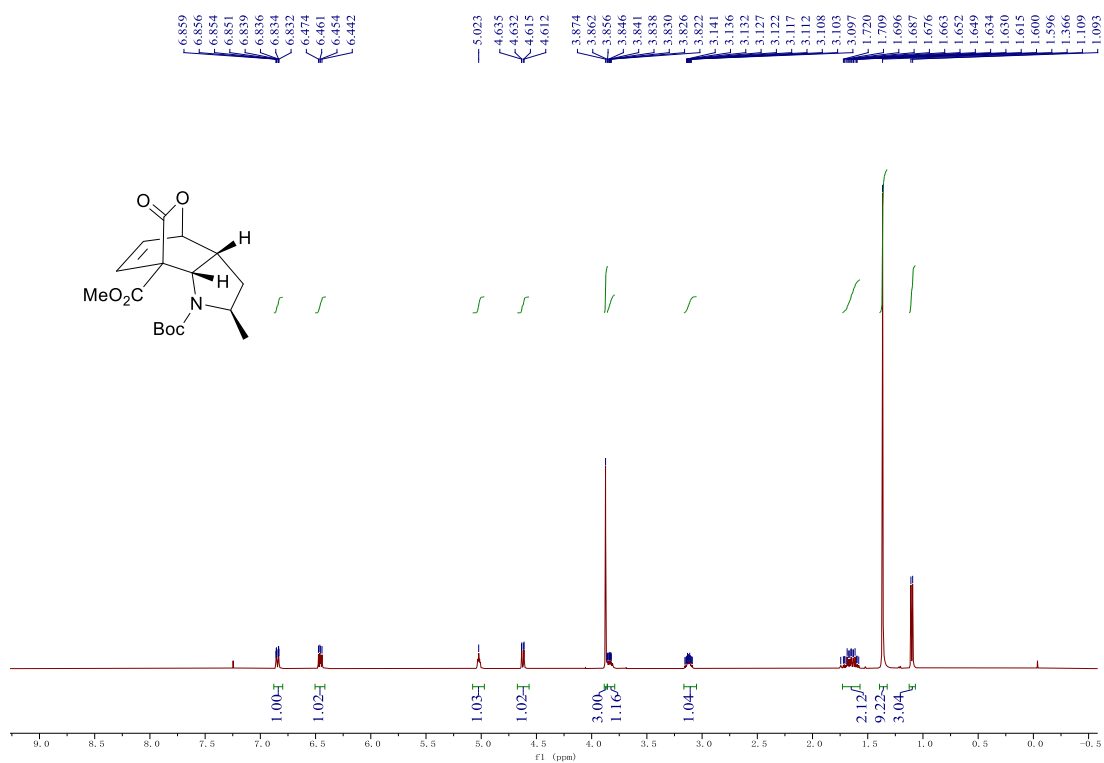

## <sup>13</sup>C NMR of Compound 3m

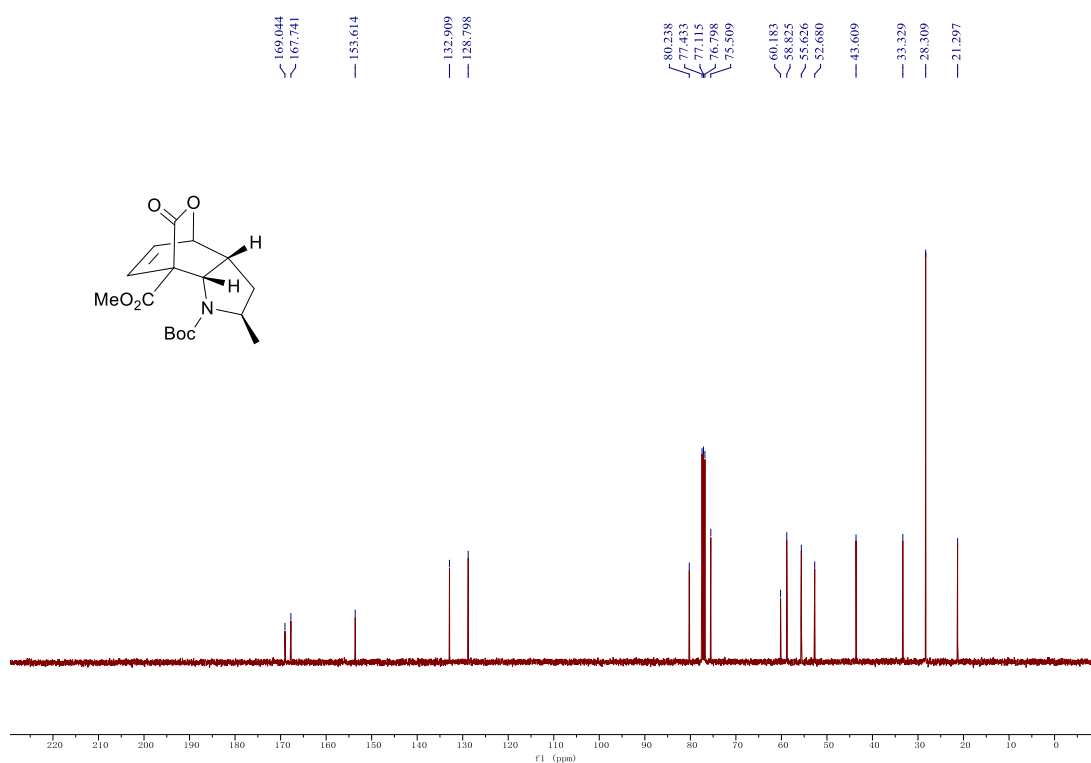

## <sup>13</sup>C NMR of Compound 3m



Compound **3n**

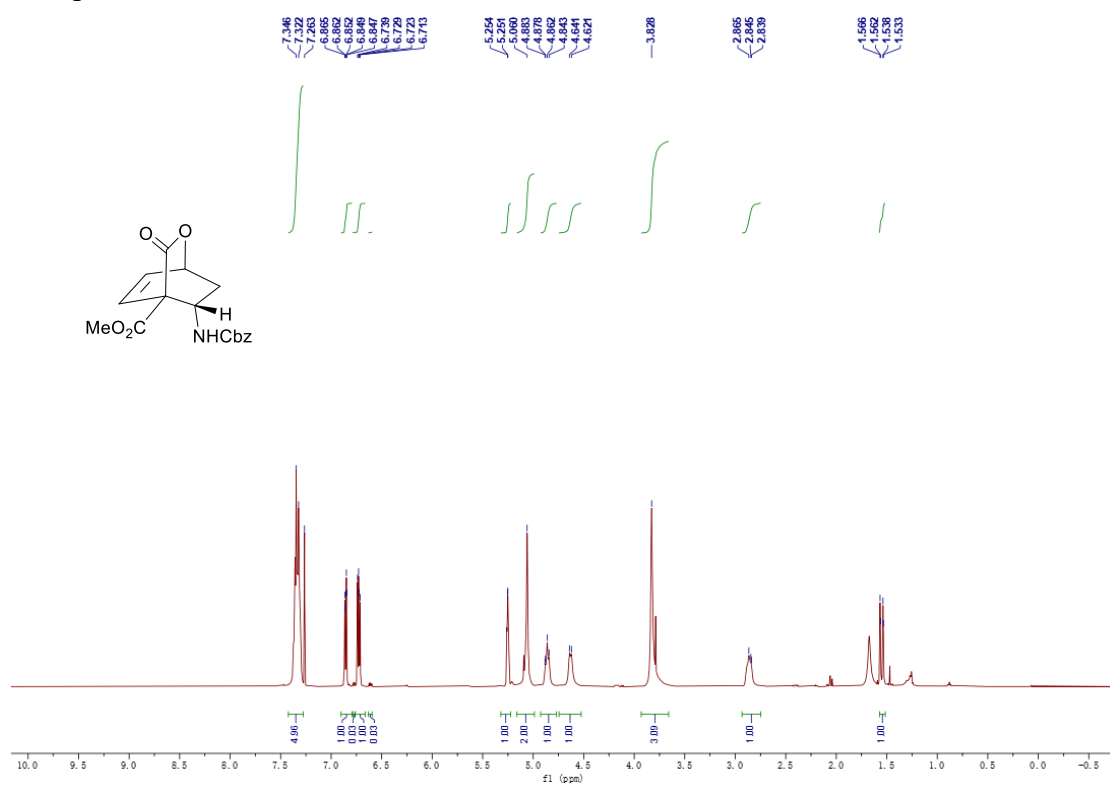

**<sup>1</sup>H NMR of Compound 3n**

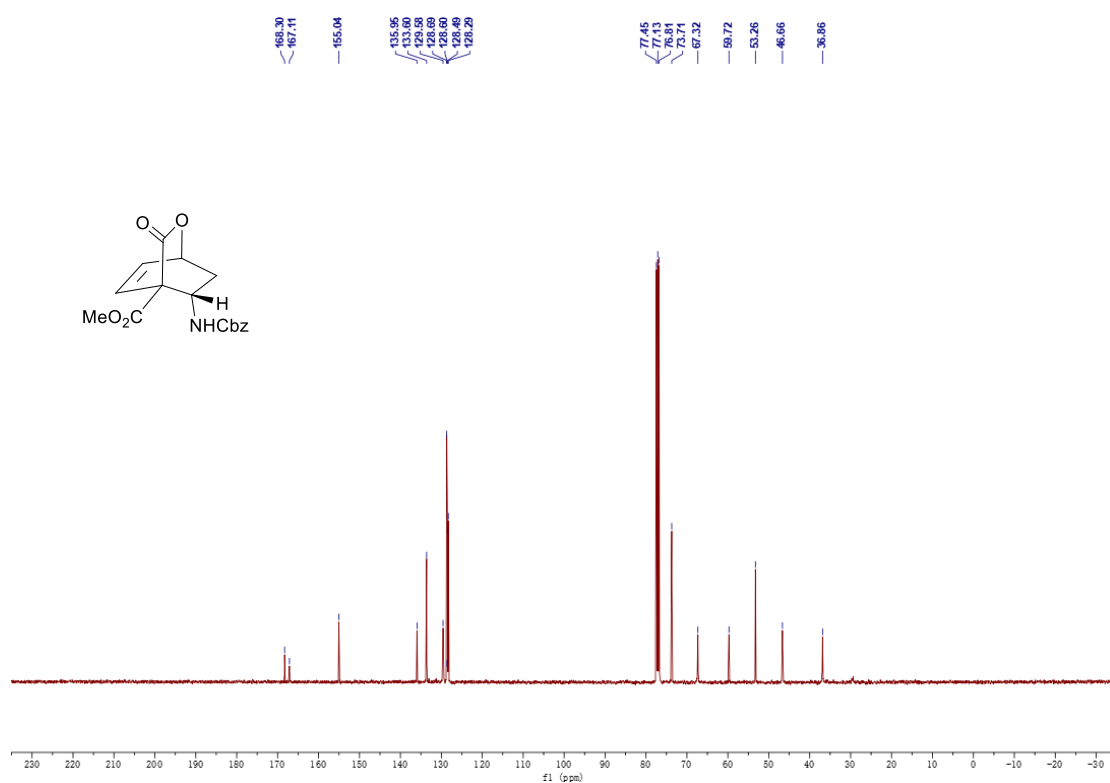

**<sup>13</sup>C NMR of Compound 3n**

# Compound 3o

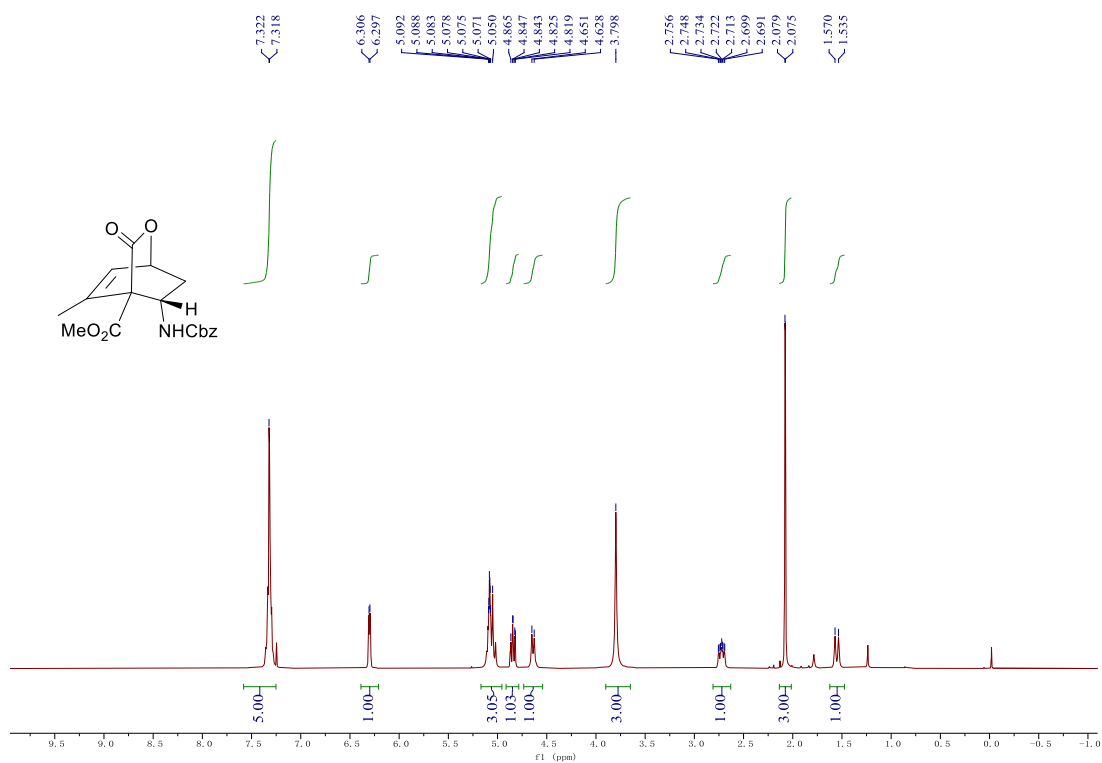

## <sup>1</sup>H NMR of Compound 3o

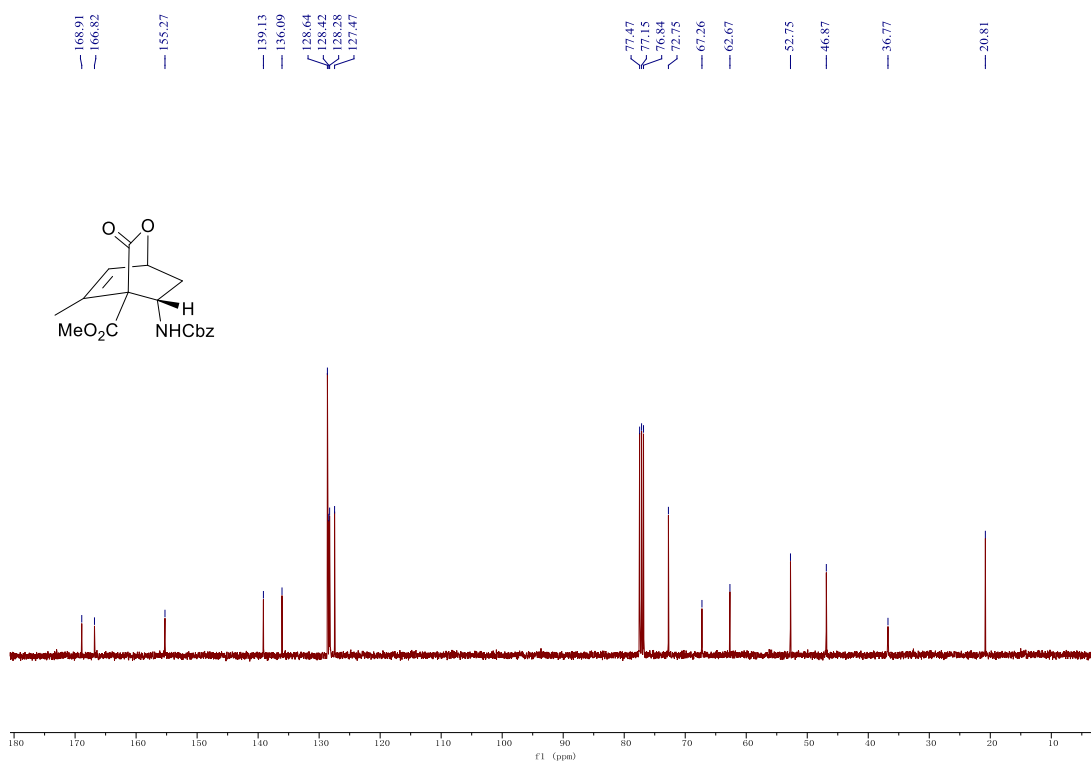

## <sup>13</sup>C NMR of Compound 3o

# Compound 3p

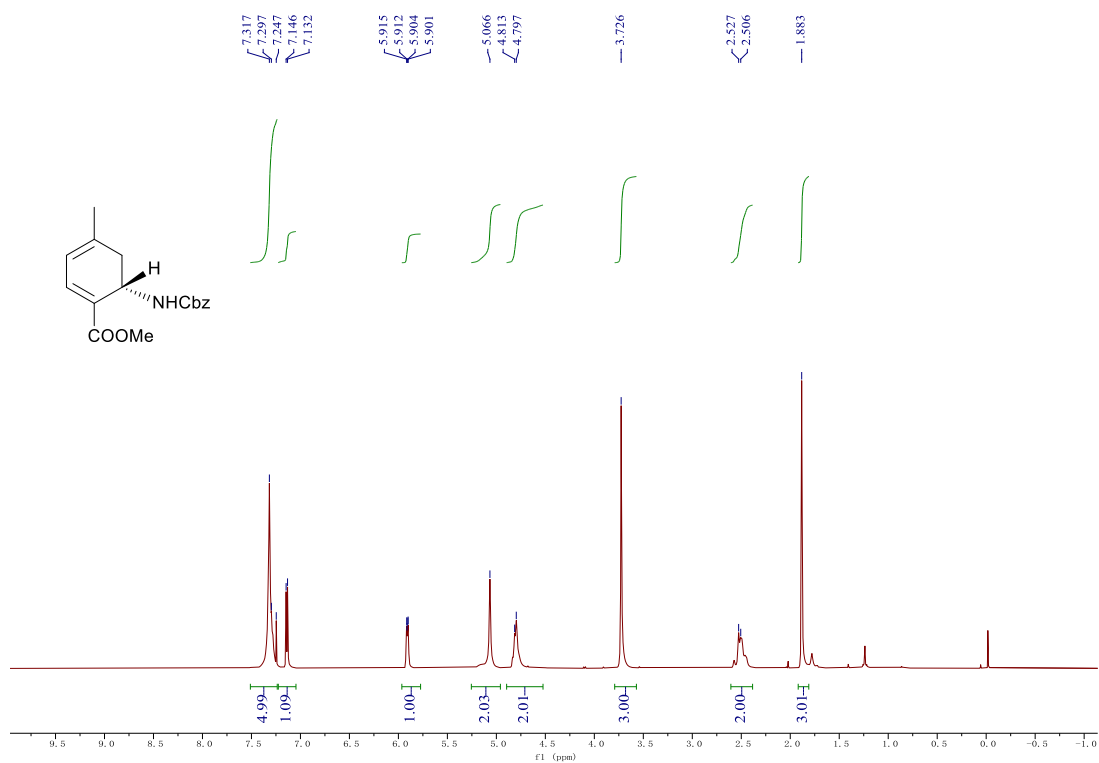

## <sup>1</sup>H NMR of Compound 3p

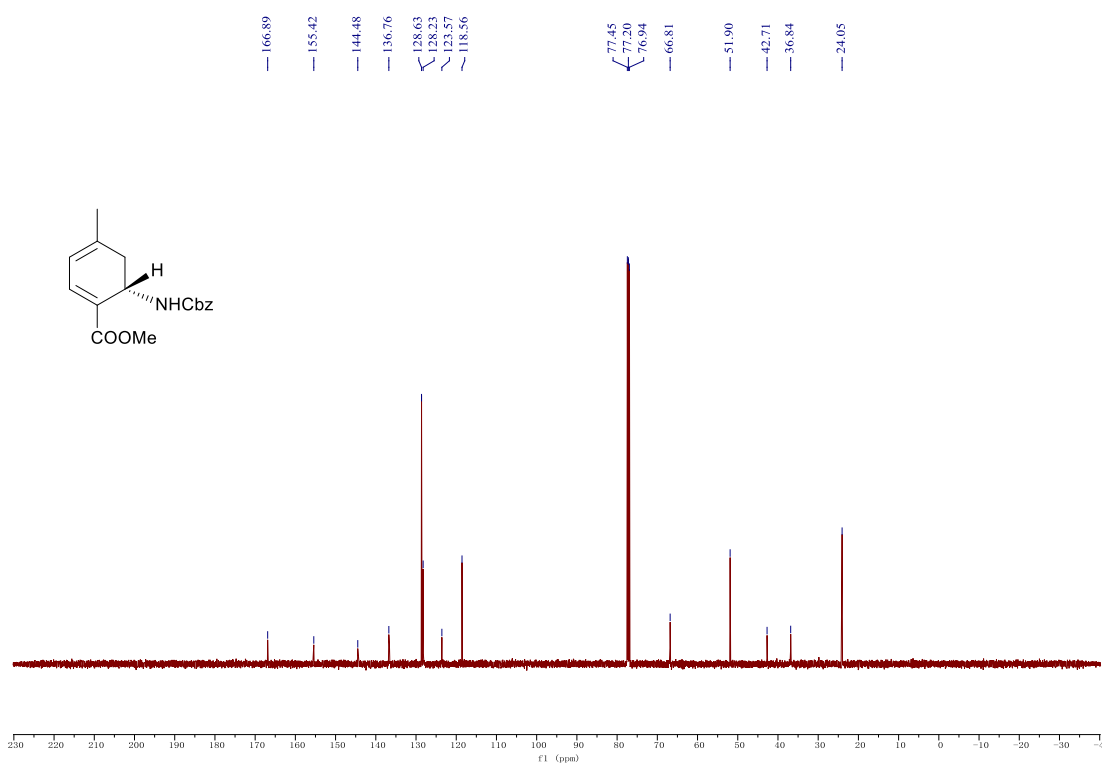

## <sup>13</sup>C NMR of Compound 3p

# Compound 3q

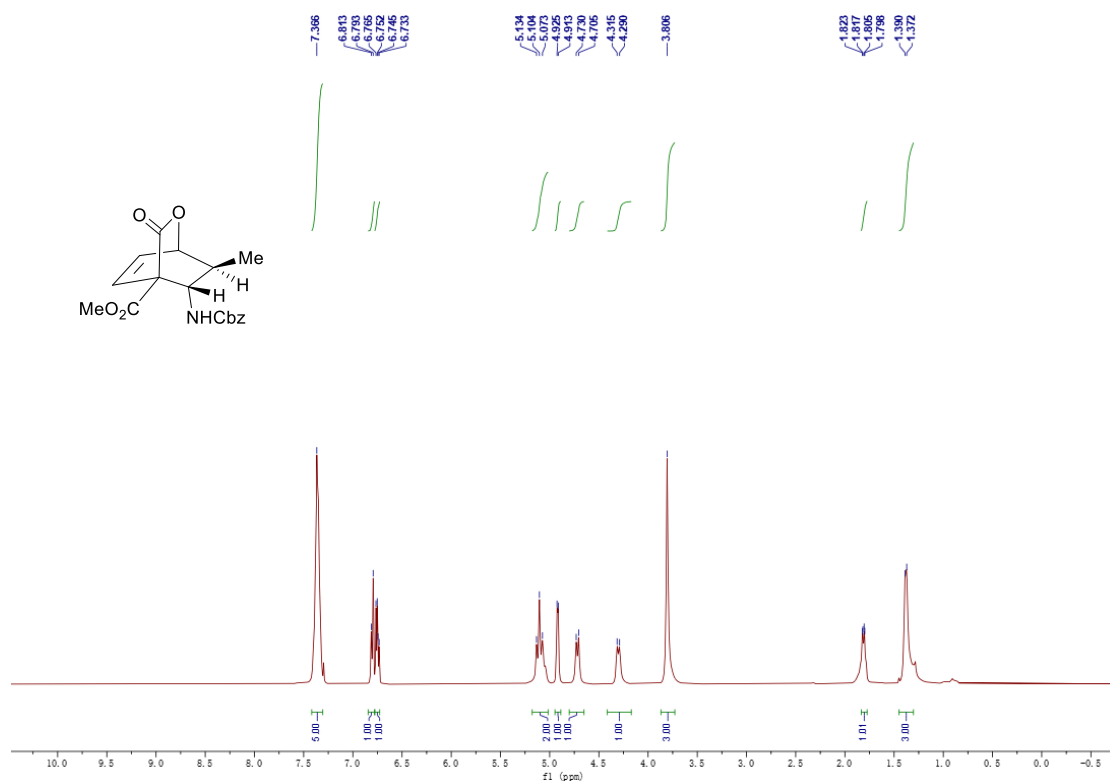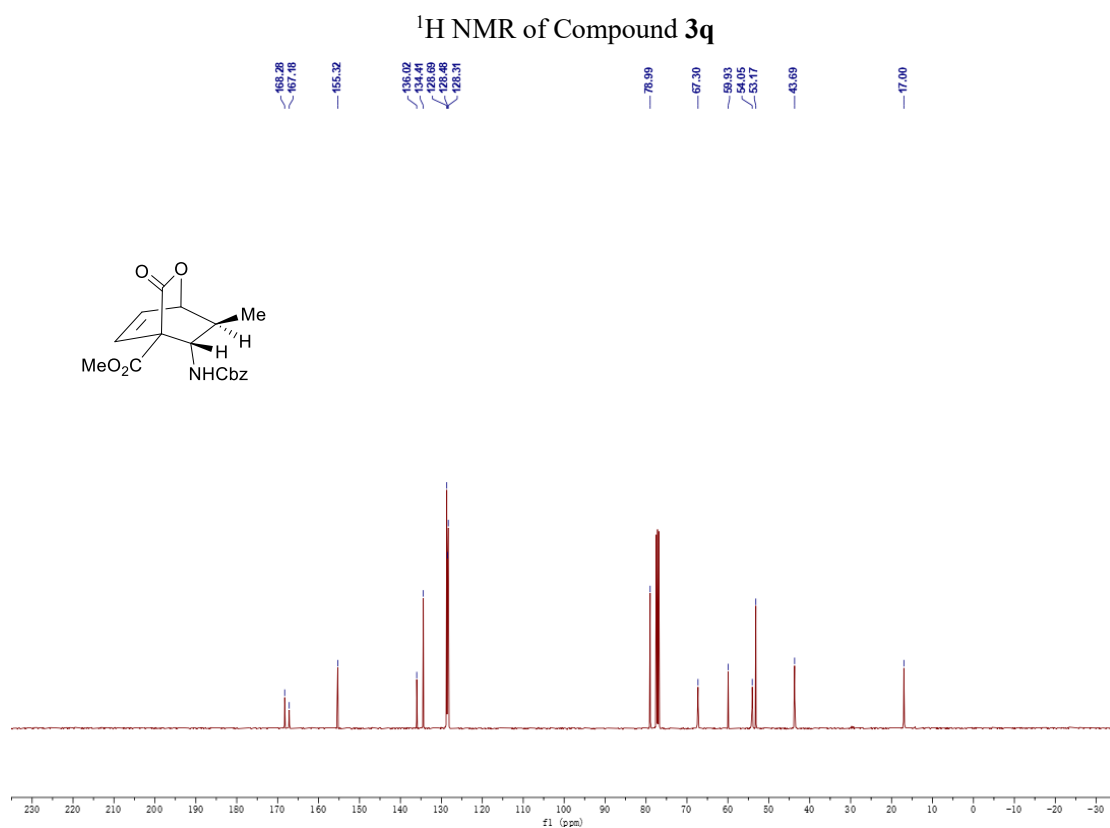

### Compound 3r

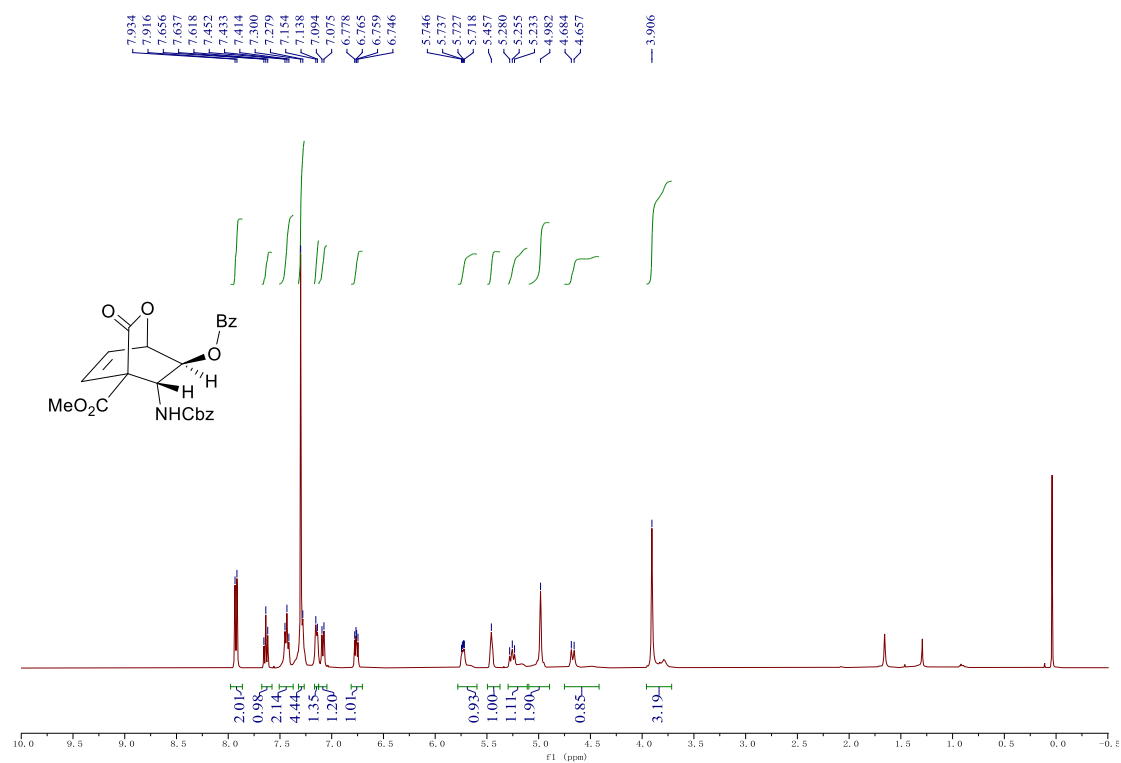

### <sup>1</sup>H NMR of Compound 3r

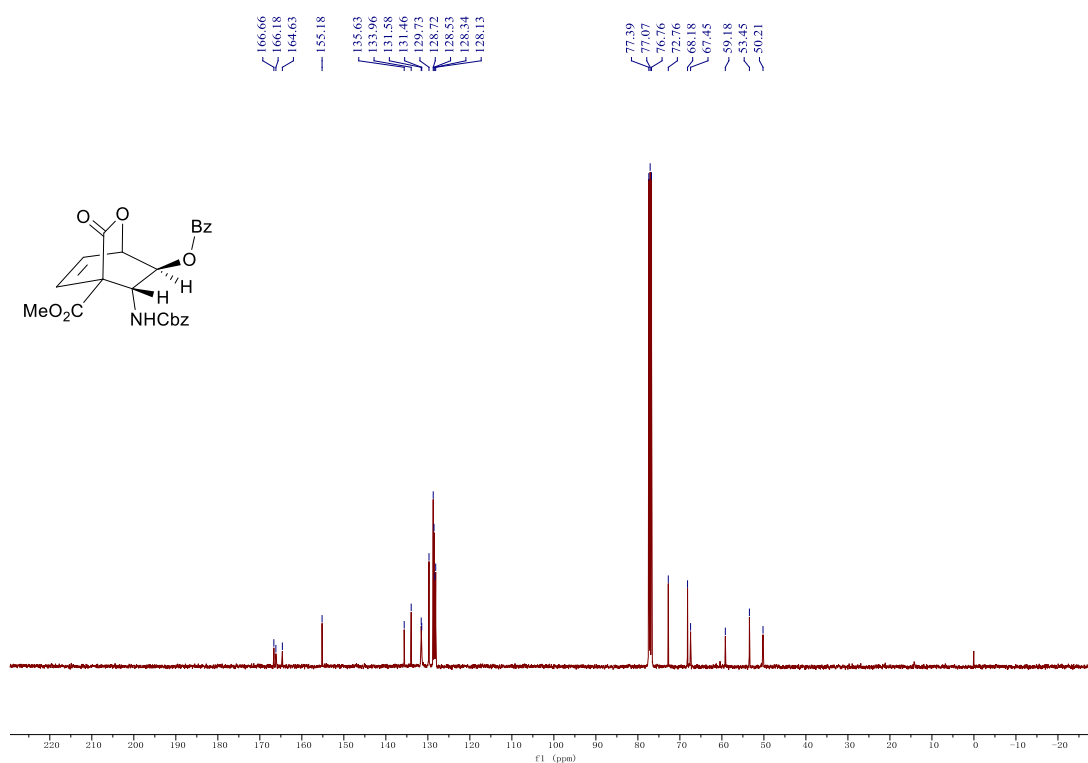

### <sup>13</sup>C NMR of Compound 3r

# Compound 3s

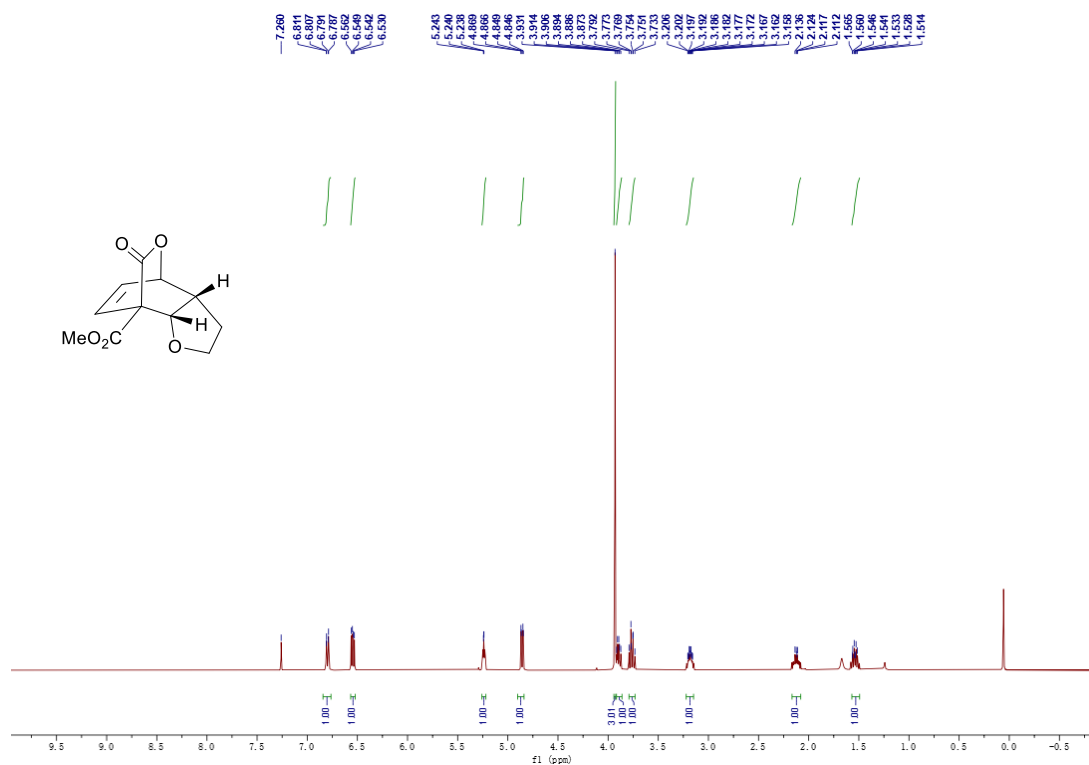

<sup>1</sup>H NMR of Compound 3s

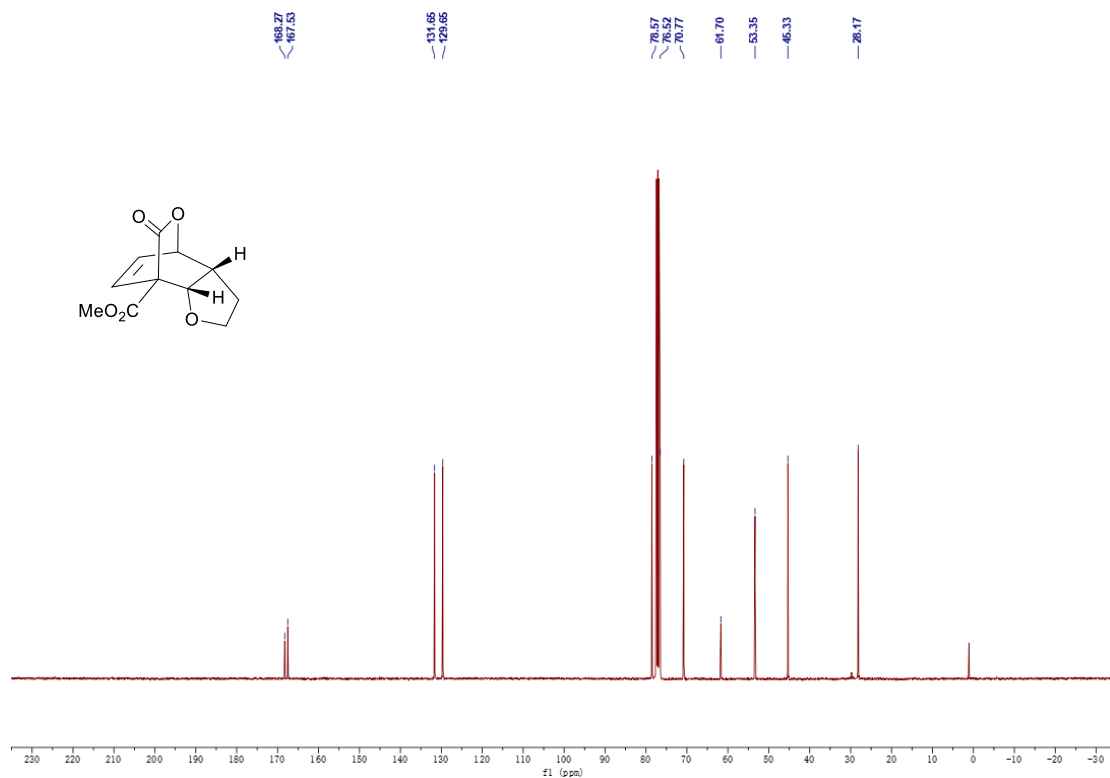

<sup>13</sup>C NMR of Compound 3s

# Compound 3t

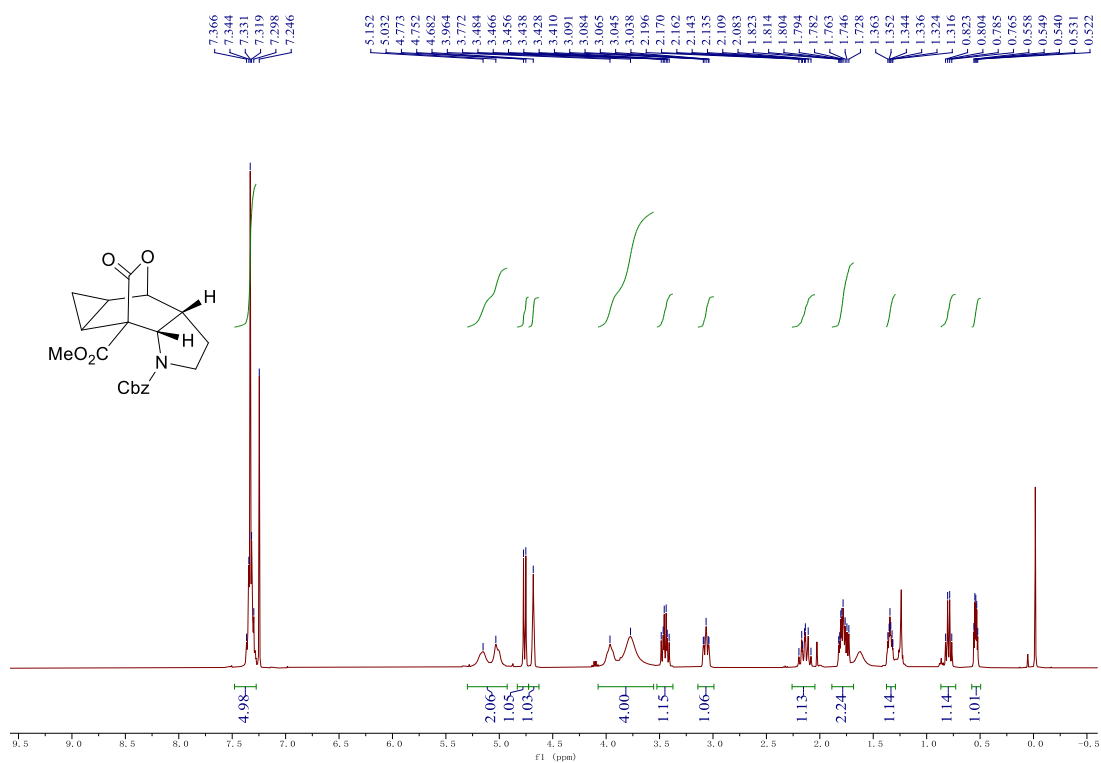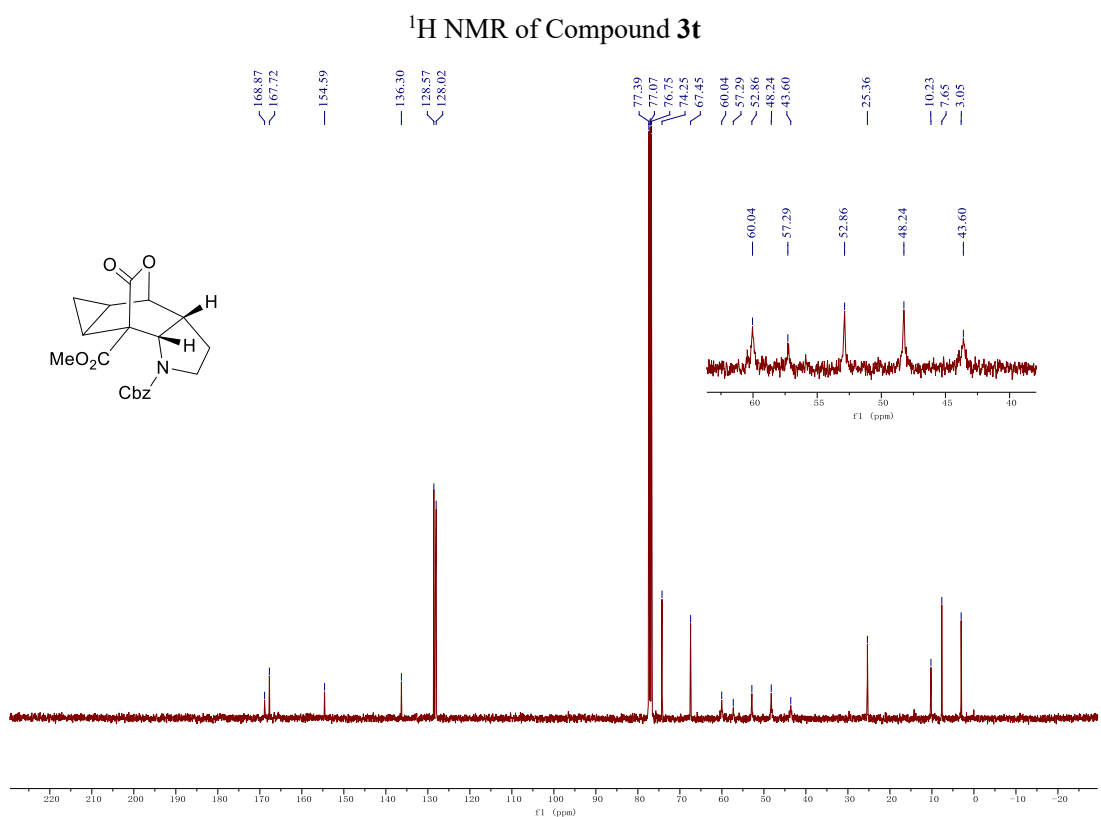

# Compound 3u

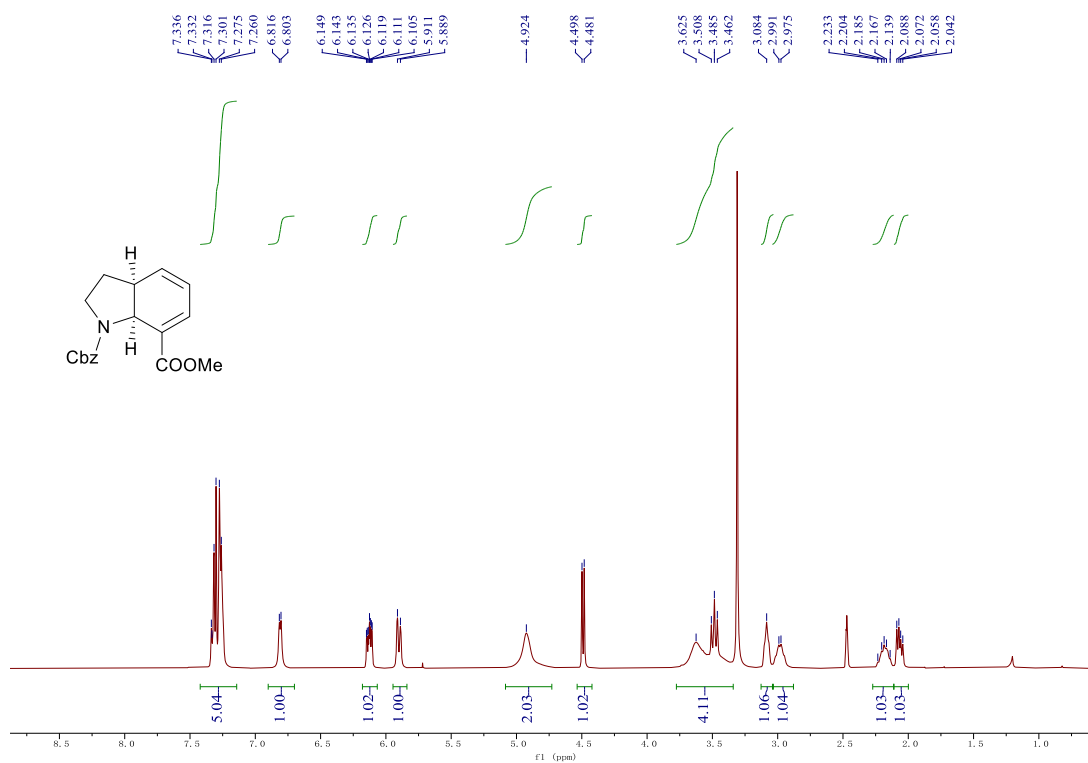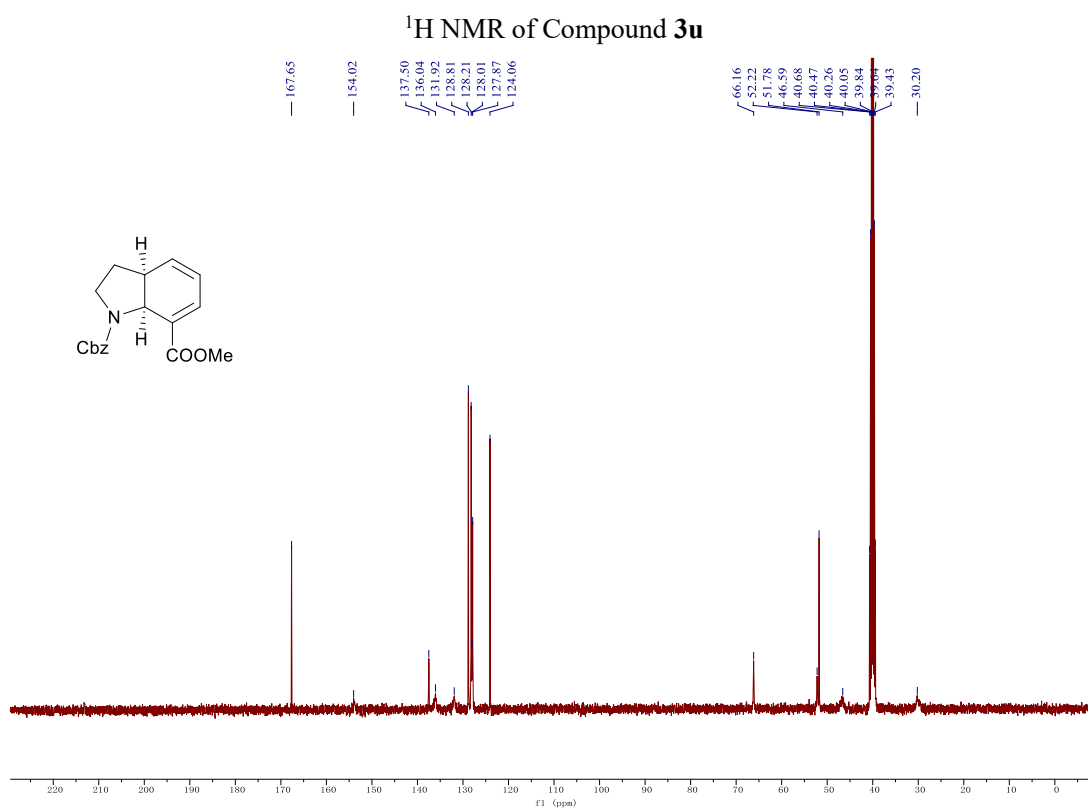



# Compound 3v

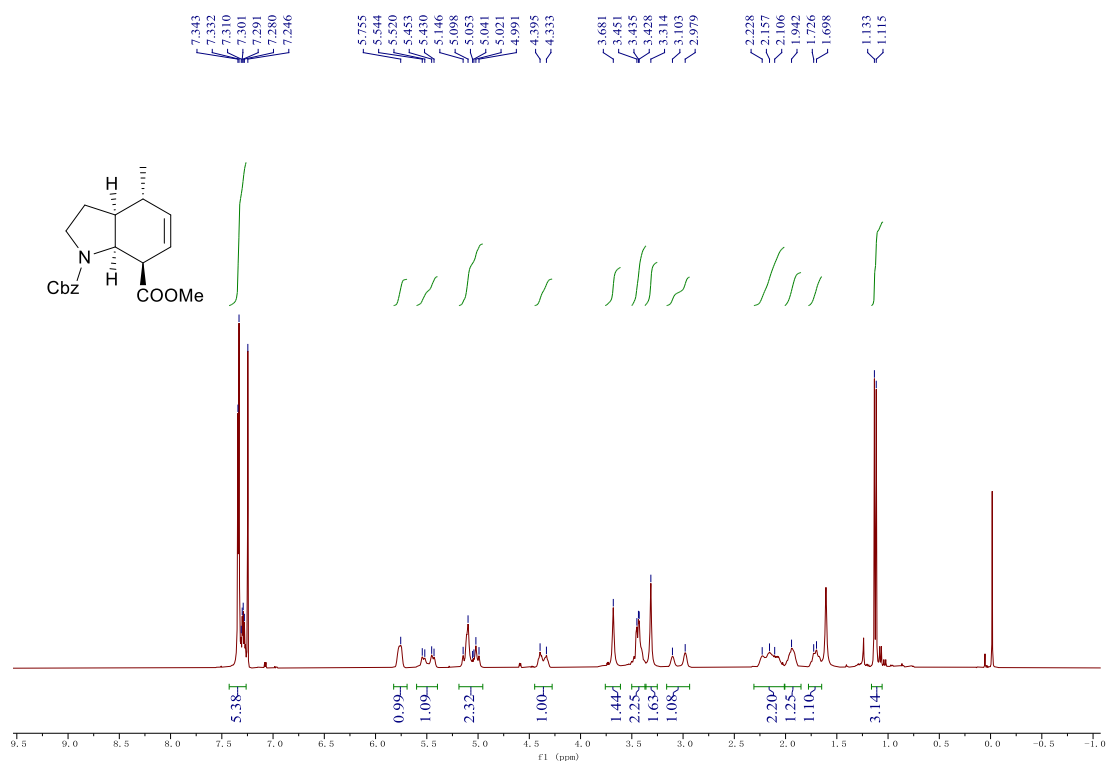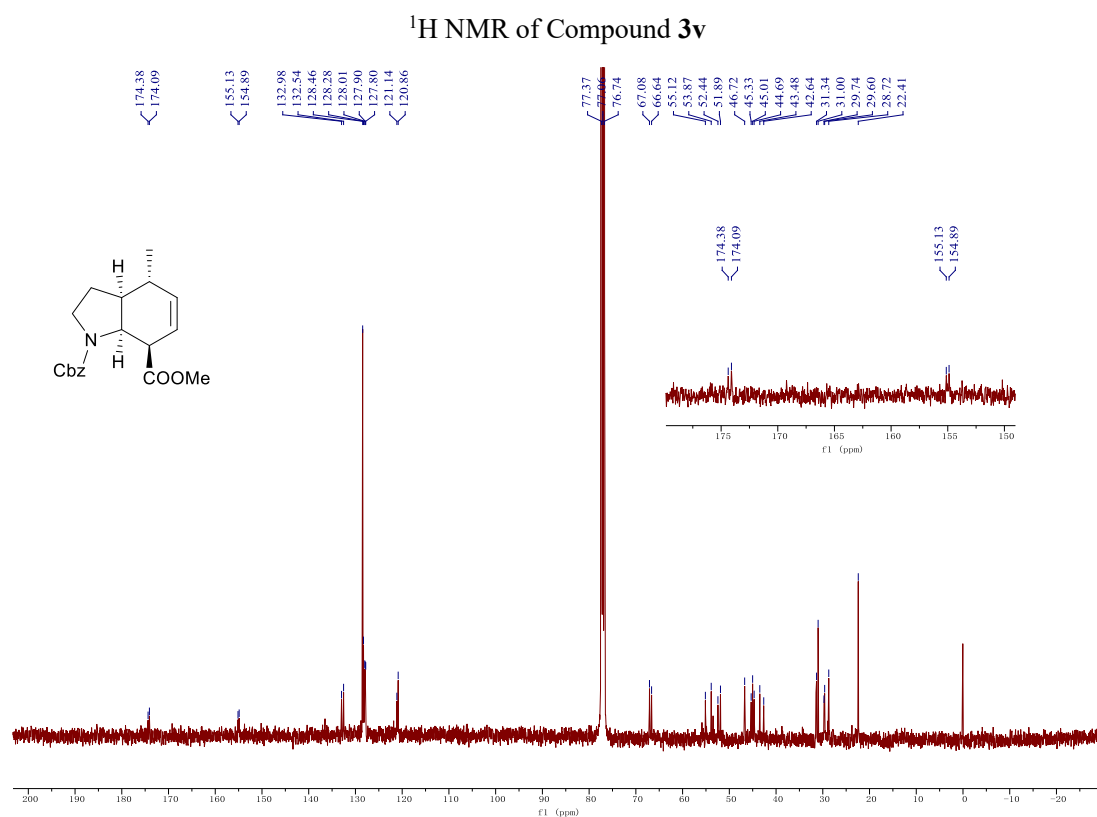

# Compound 4

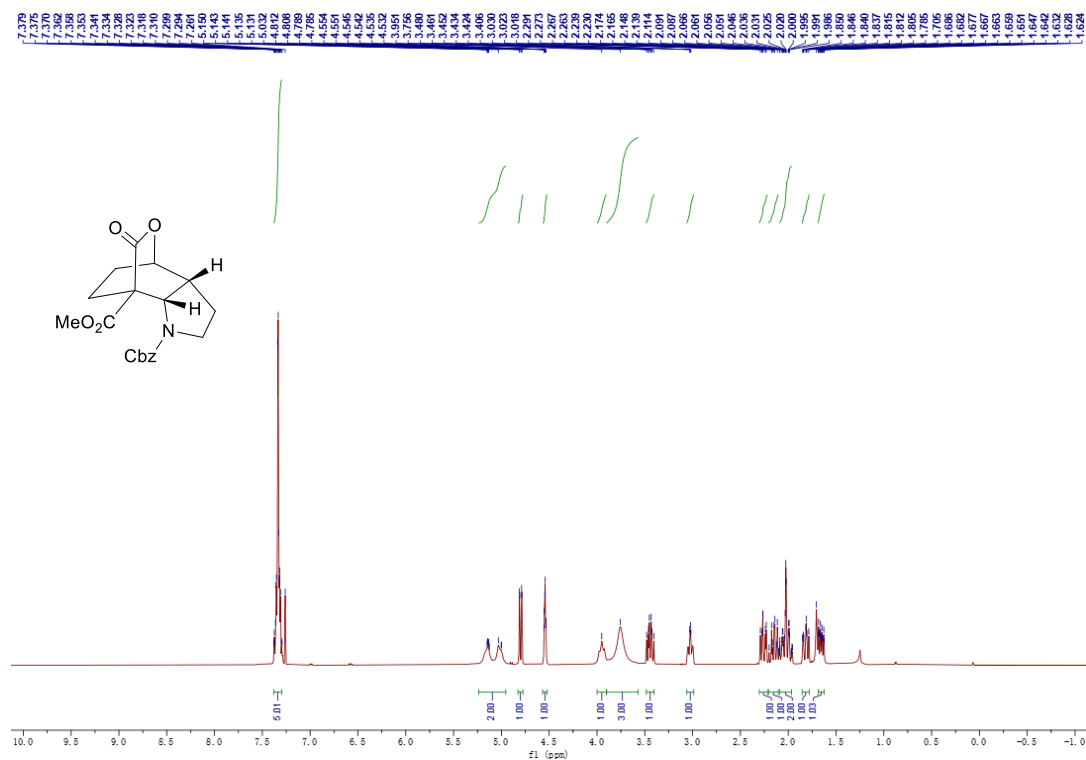

## <sup>1</sup>H NMR of Compound 4

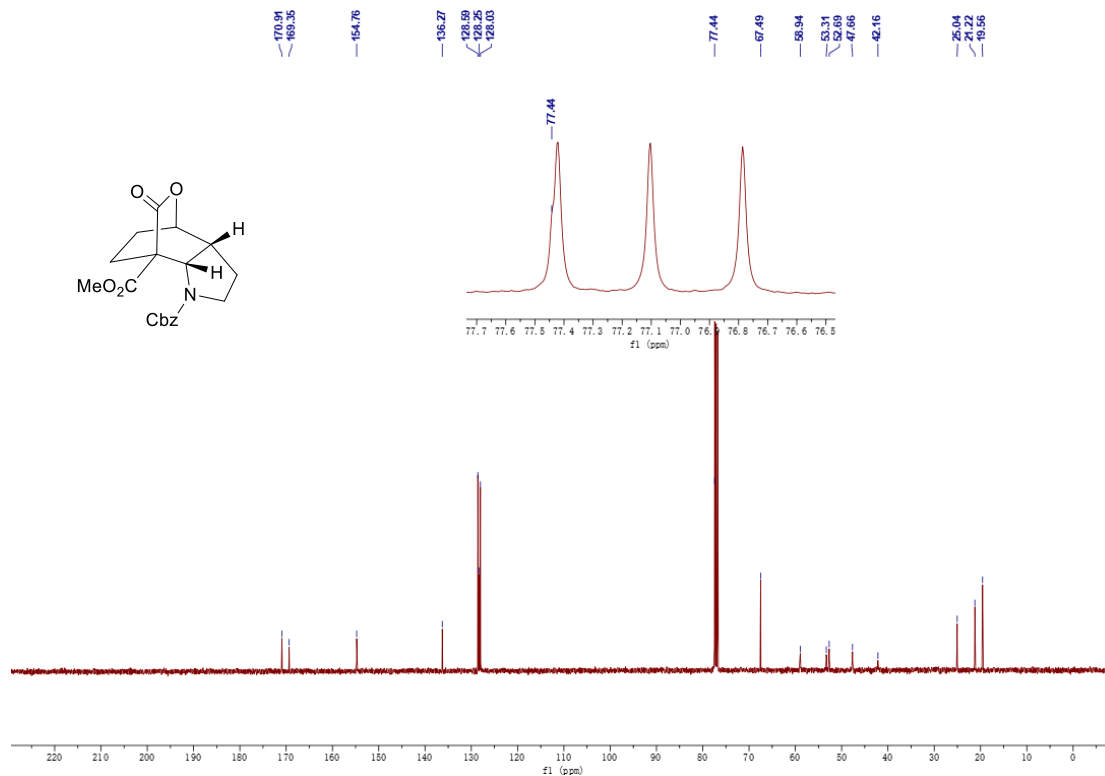

## <sup>13</sup>C NMR of Compound 4

# Compound 5

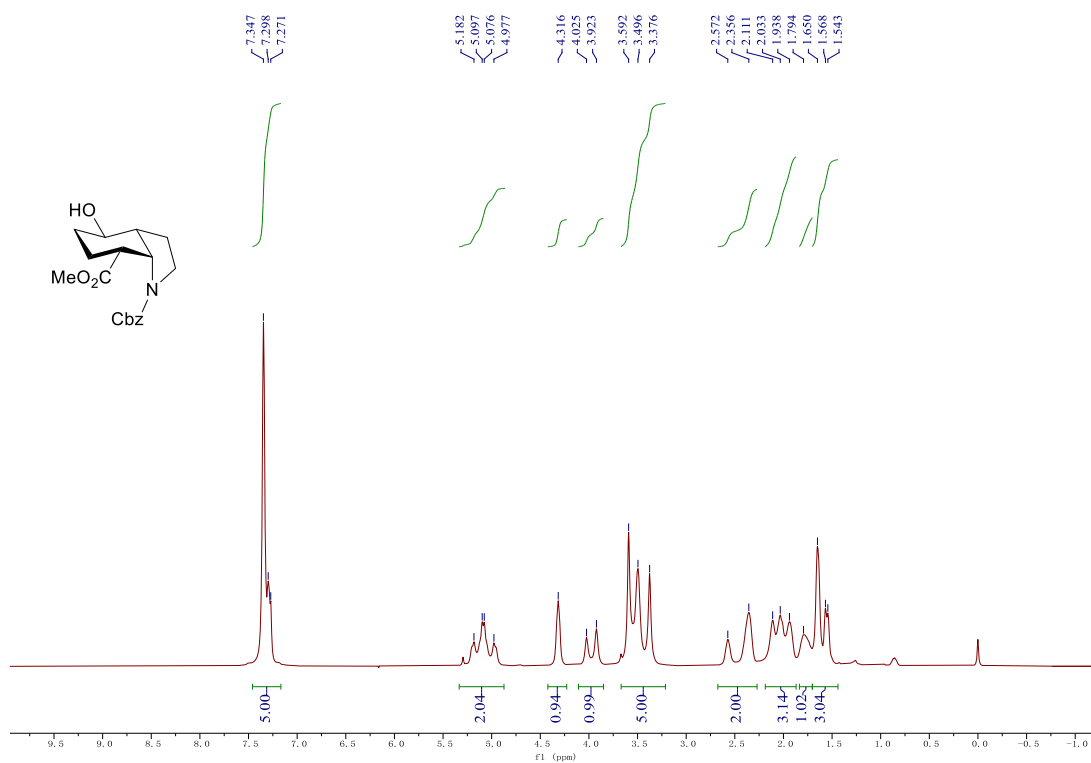

## <sup>1</sup>H NMR of Compound 5

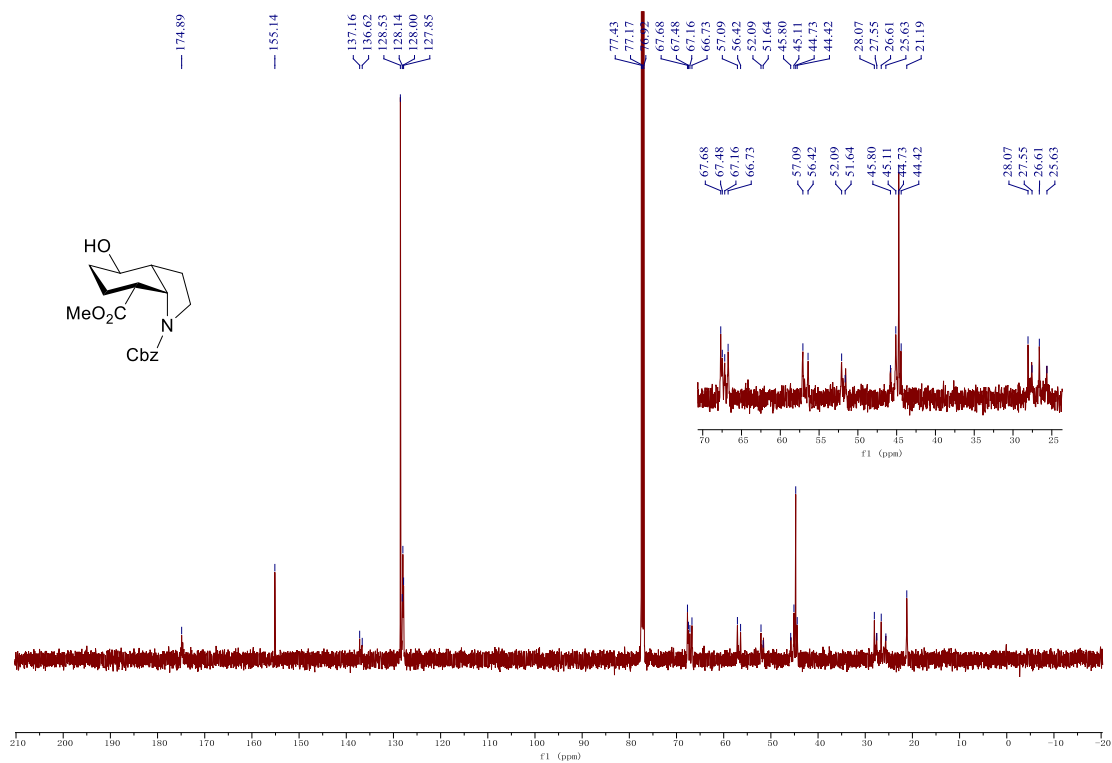

## <sup>13</sup>C NMR of Compound 5

# Compound 6

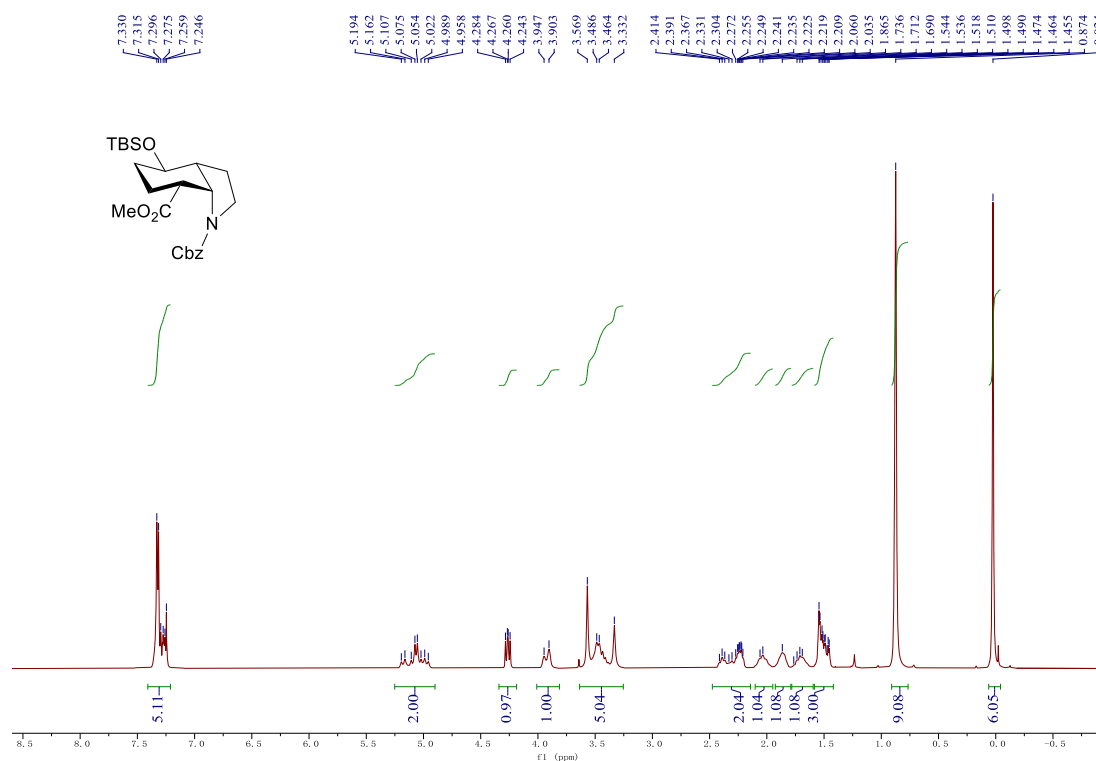

## <sup>1</sup>H NMR of Compound 6

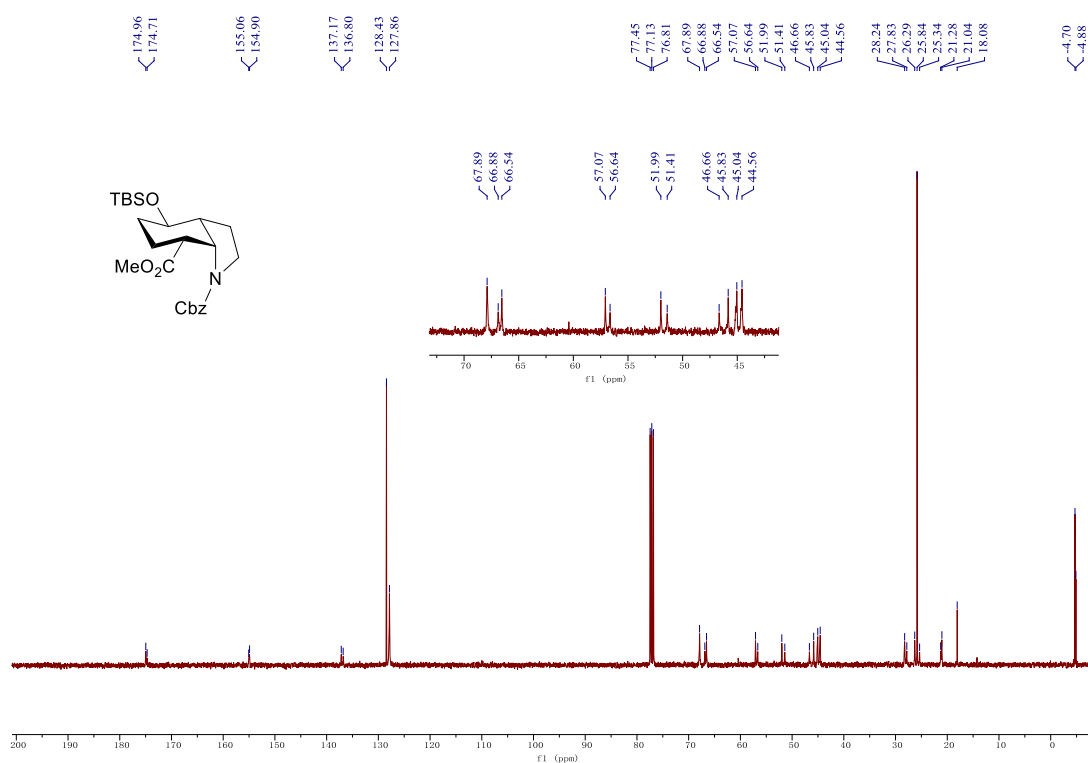

## <sup>13</sup>C NMR of Compound 6

# Compound 7

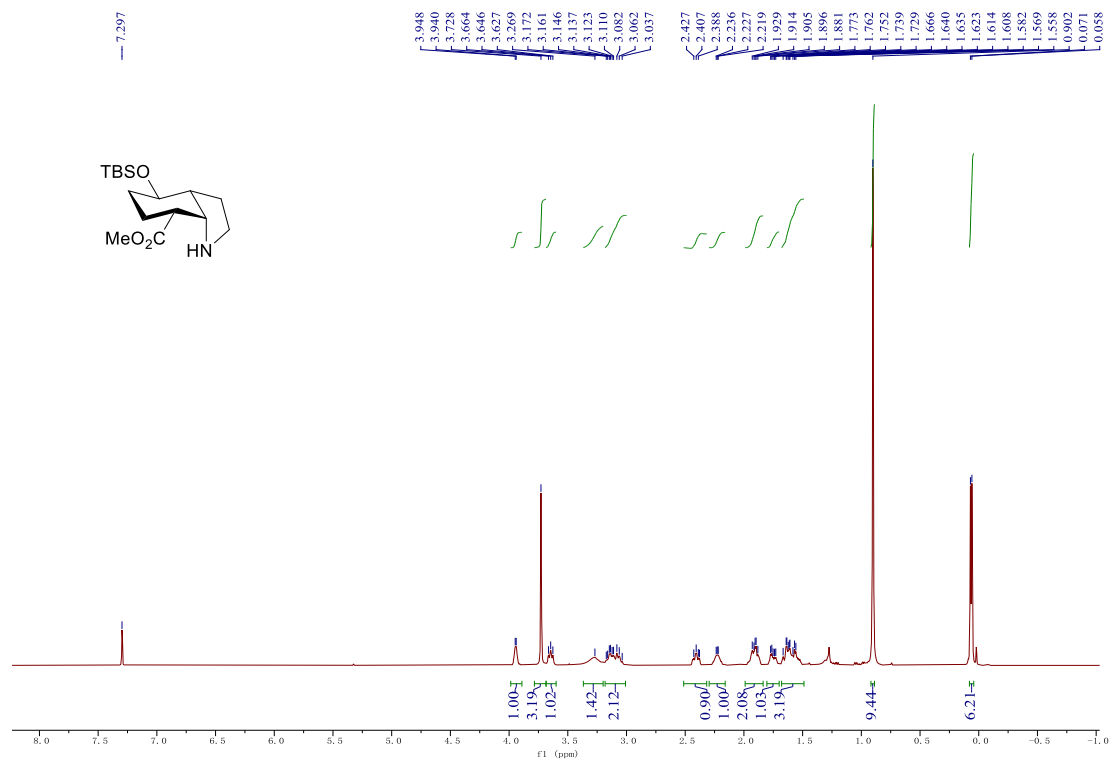

## <sup>1</sup>H NMR of Compound 7

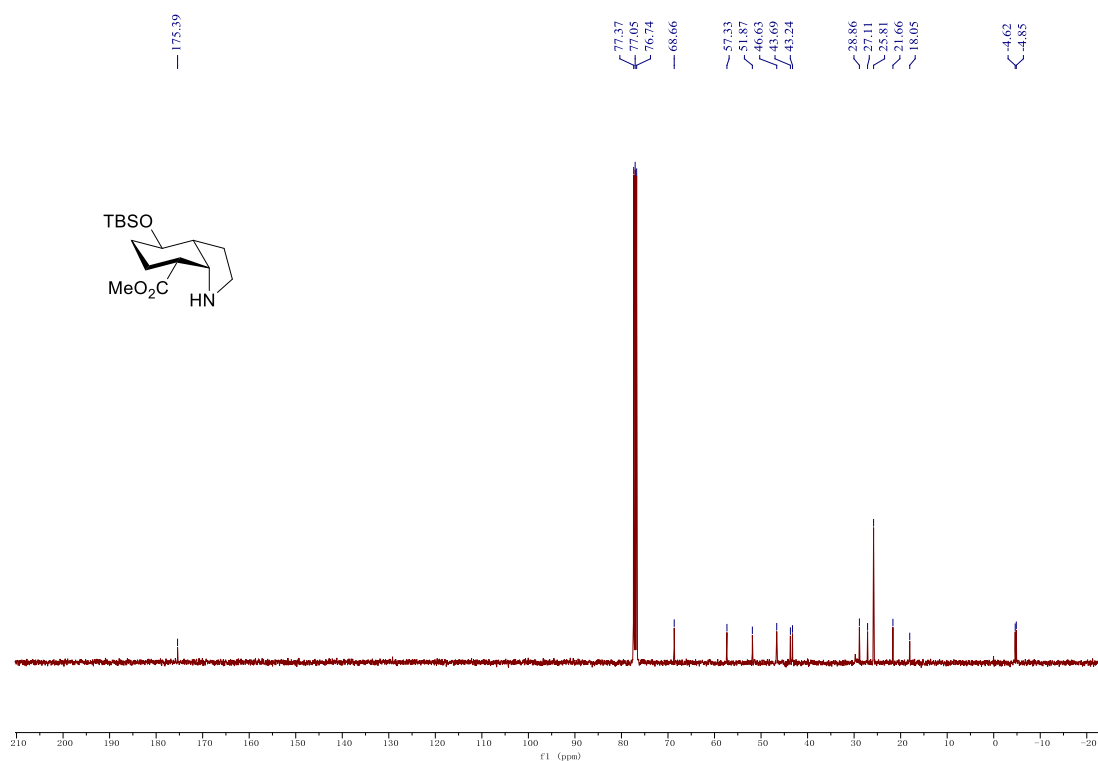

## <sup>13</sup>C NMR of Compound 7

# Compound 8

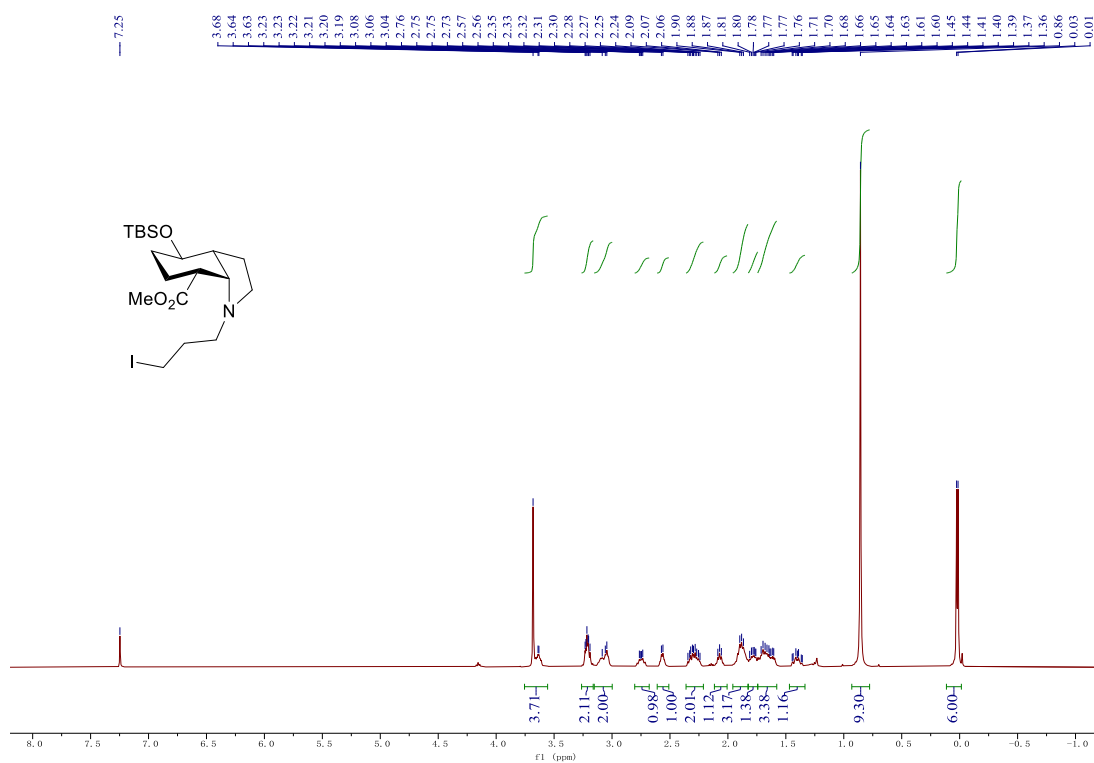

<sup>1</sup>H NMR of Compound 8

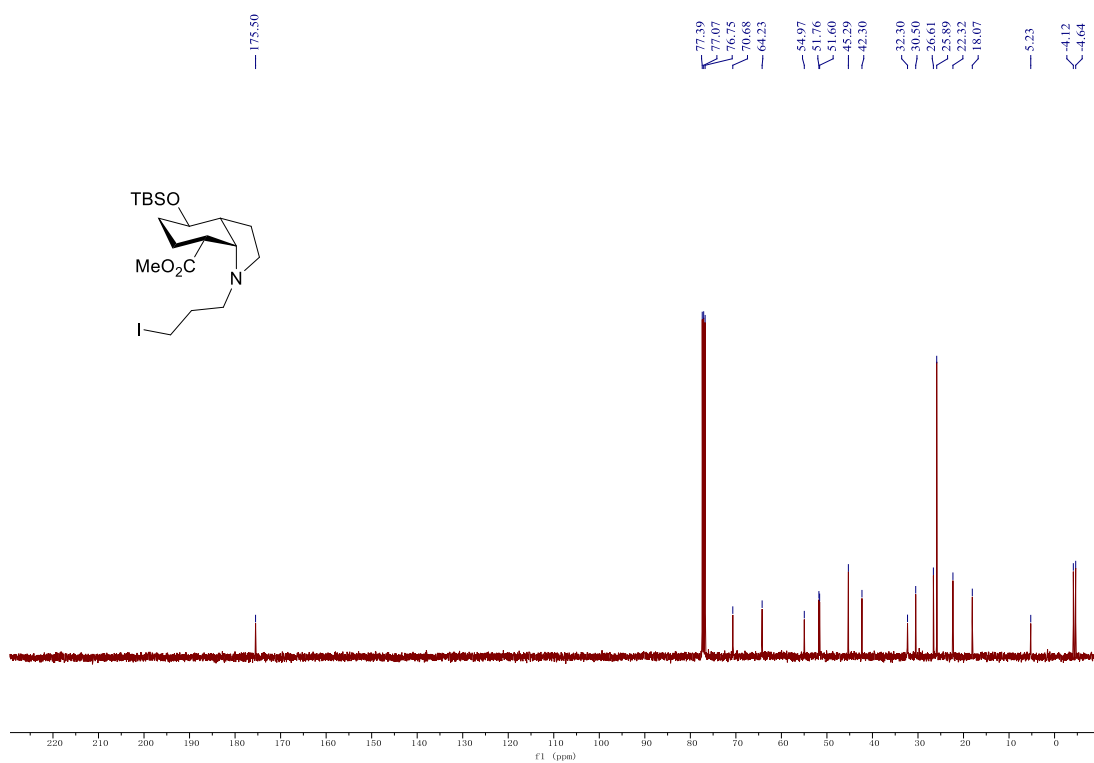

<sup>13</sup>C NMR of Compound 8

# Compound 9

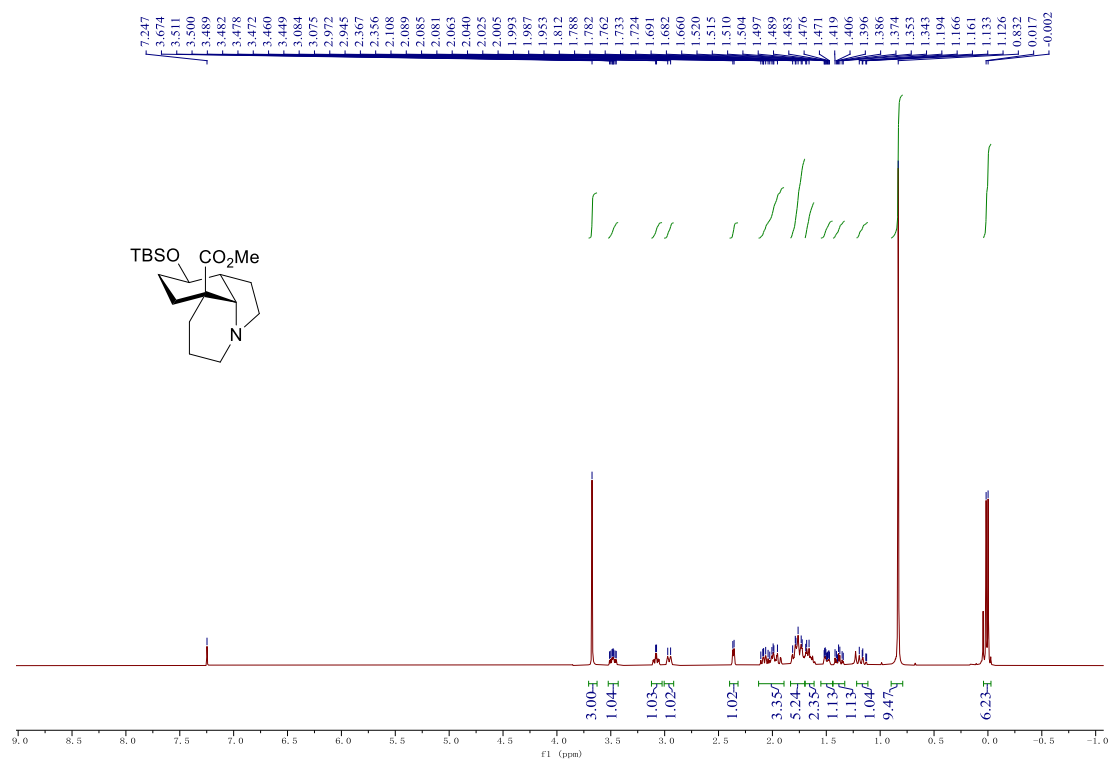

<sup>1</sup>H NMR of Compound 9

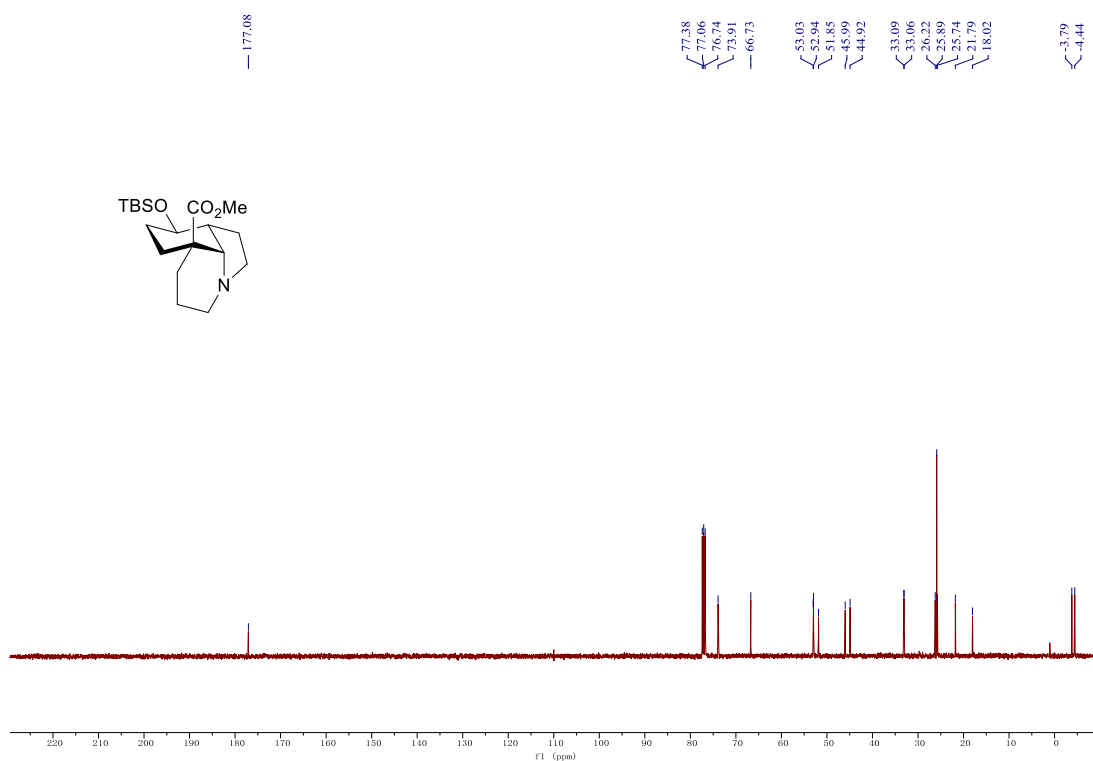

<sup>13</sup>C NMR of Compound 9

# Compound 10

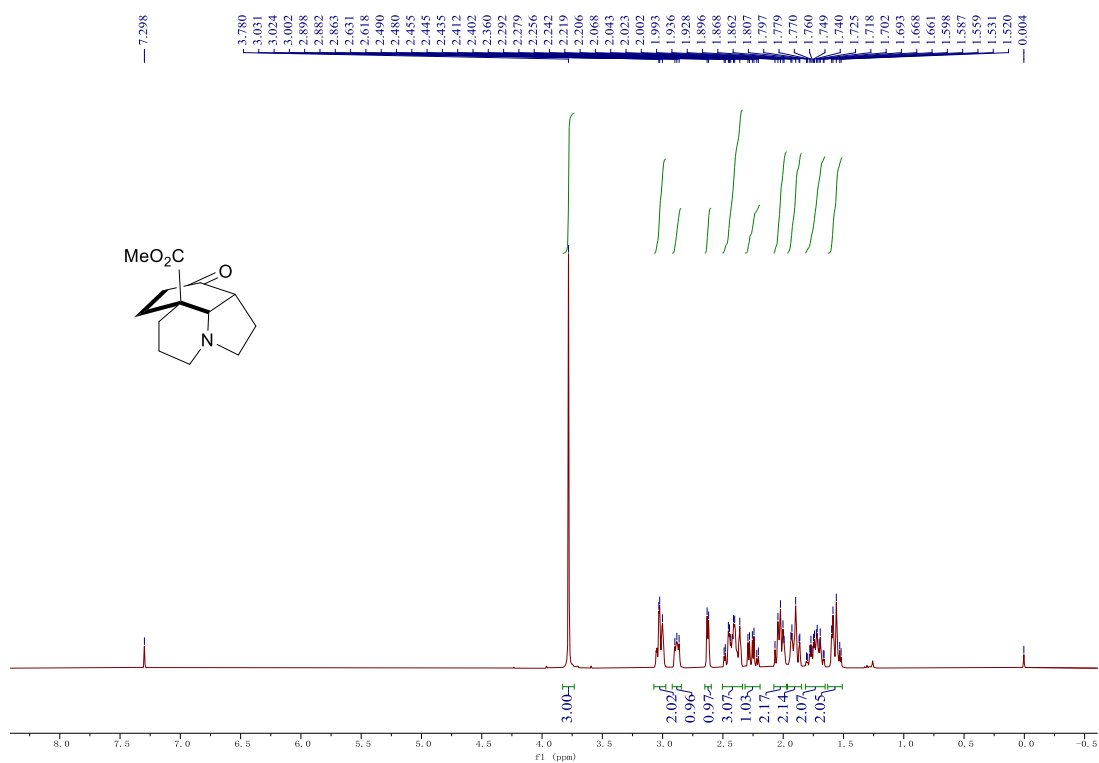

<sup>1</sup>H NMR of Compound 10

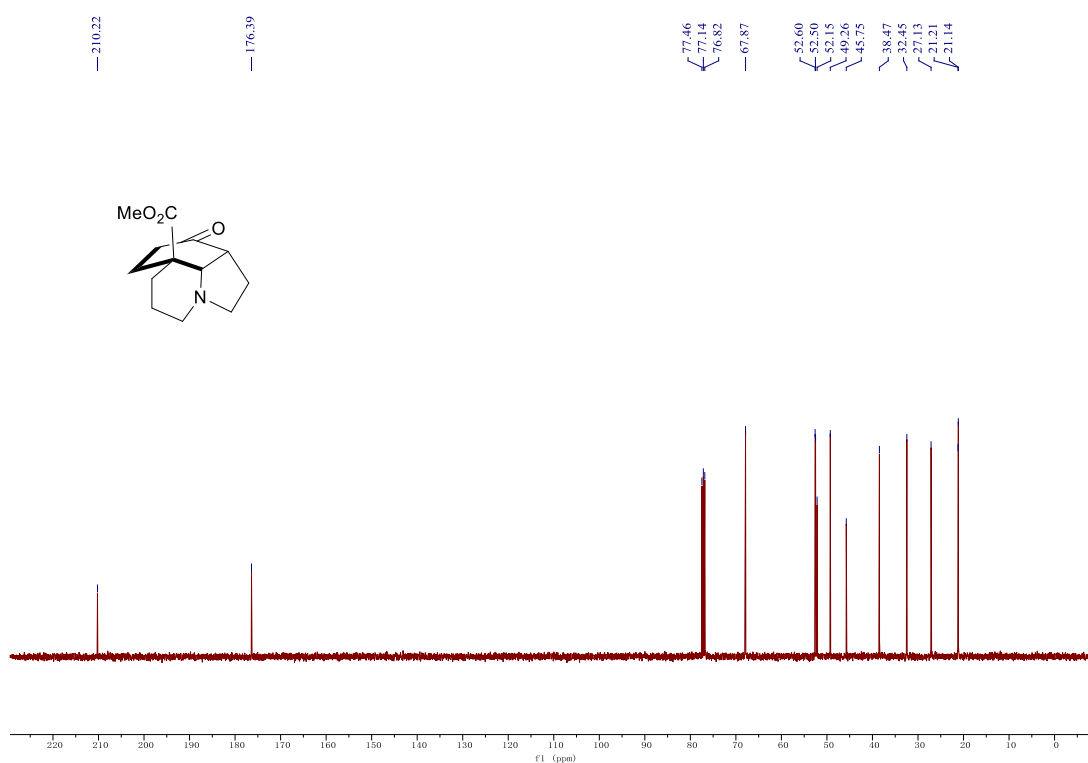

<sup>13</sup>C NMR of Compound 10
